# Supplementary material for: Novel Route to Cationic Palladium(II)–Cyclopentadienyl Complexes Containing Phosphine Ligands and Their Catalytic Activities
Source: MDPI journal article supplement (doi:10.3390/molecules28104141), 2023-05-17
Supplement: s1 [file s1]

## Supporting Information

### **Novel route to cationic palladium(II)–cyclopentadienyl complexes containing phosphine ligands and their catalytic activities**

Dmitry S. Suslov<sup>1†</sup>, Mikhail V. Bykov<sup>1</sup>, Marina V. Pakhomova<sup>1</sup>, Timur S. Orlov<sup>1,2</sup>, Zorikto D. Abramov<sup>1</sup>, Anastasia V. Suchkova<sup>1</sup>, Igor A. Ushakov<sup>3</sup>, Pavel A. Abramov<sup>4,5</sup>, Alexander S. Novikov<sup>6,7†</sup>

<sup>1</sup>*Irkutsk State University, ul. K. Marksa, 1, Irkutsk, 664003, Russia*

<sup>2</sup>*National Research Irkutsk State Technical University, Lermontov St, 83, Irkutsk, 664074, Russia*

<sup>3</sup>*A.E. Favorsky Irkutsk Institute of Chemistry SB RAS, Favorsky st., 1, Irkutsk, 664033, Russia*

<sup>4</sup>*Nikolaev Institute of Inorganic Chemistry SB RAS, pr-kt Akad. Lavrentieva, 3, Novosibirsk, 630090, Russia*

<sup>5</sup>*Russia Research School of Chemistry and Applied Biomedical Sciences, Tomsk Polytechnic University, Tomsk 634034, Russian Federation*

<sup>6</sup>*Institute of Chemistry, Saint Petersburg State University, Universitetskaya Nab., 7/9, Saint Petersburg, 199034, Russian Federation*

<sup>7</sup>*Research Institute of Chemistry, Peoples' Friendship University of Russia (RUDN University), Miklukho-Maklaya St., 6, Moscow, 117198, Russian Federation*

<sup>†</sup>*Correspondence should be addressed: e-mail: suslov@chem.isu.ru; suslov.dmitry@gmail.com.*

<sup>†</sup>*Correspondence should be addressed: [a.s.novikov@spbu.ru](mailto:a.s.novikov@spbu.ru)*

## CONTENTS

|     |                                                                                                                                                   |    |
|-----|---------------------------------------------------------------------------------------------------------------------------------------------------|----|
| S.1 | XRD details .....                                                                                                                                 | 2  |
| S.2 | Computed Cartesian coordinates for palladium complexes .....                                                                                      | 6  |
| S.3 | NMR spectra .....                                                                                                                                 | 20 |
| S.4 | FTIR spectra .....                                                                                                                                | 43 |
| S.5 | ESI-MS spectra .....                                                                                                                              | 46 |
| S.6 | UV-vis spectra .....                                                                                                                              | 56 |
| S.7 | Reaction of [Pd( $\kappa^2$ -O,O'-acac)(TOMPP) <sub>2</sub> ]BF <sub>4</sub> with BF <sub>3</sub> ·OEt <sub>2</sub> in the presence of MeCN ..... | 59 |
| S.8 | PPAs characterization .....                                                                                                                       | 64 |

## S.1 XRD details

Table S.1 – XRD experimental details

| Compound                                                                   | <b>1</b>                                                                            | <b>7</b>                                                                                  | <b>8</b>                                                                                                                     |
|----------------------------------------------------------------------------|-------------------------------------------------------------------------------------|-------------------------------------------------------------------------------------------|------------------------------------------------------------------------------------------------------------------------------|
| Chemical formula                                                           | C <sub>48</sub> H <sub>43</sub> BF <sub>4</sub> P <sub>2</sub> Pd                   | C <sub>34.80</sub> H <sub>35.20</sub> BF <sub>4</sub> N <sub>1.40</sub> P <sub>2</sub> Pd | C <sub>40</sub> H <sub>41</sub> BF <sub>4</sub> P <sub>2</sub> Pd                                                            |
| $M_r$                                                                      | 874.97                                                                              | 728.19                                                                                    | 776.88                                                                                                                       |
| Crystal system, space group                                                | Monoclinic, $P2_1/c$                                                                | Orthorhombic, $Pnma$                                                                      | Triclinic, $P1$                                                                                                              |
| $a, b, c$ (Å)                                                              | 10.4737 (2), 18.7324 (4), 21.1218 (4)                                               | 16.6490 (4), 21.1894 (4), 10.7245 (2)                                                     | 9.9489 (2), 9.9597 (3), 10.1331 (2)                                                                                          |
| $\alpha, \beta, \gamma$ (°)                                                | 90, 100.368 (1), 90                                                                 | 90, 90, 90                                                                                | 80.095 (1), 63.473 (1), 84.946 (1)                                                                                           |
| $V$ (Å <sup>3</sup> )                                                      | 4076.38 (14)                                                                        | 3783.41 (14)                                                                              | 884.90 (4)                                                                                                                   |
| $Z$                                                                        | 4                                                                                   | 4                                                                                         | 1                                                                                                                            |
| $\mu$ (mm <sup>-1</sup> )                                                  | 0.59                                                                                | 0.62                                                                                      | 0.66                                                                                                                         |
| Crystal size (mm)                                                          | 0.15 × 0.13 × 0.04                                                                  | 0.17 × 0.06 × 0.03                                                                        | 0.11 × 0.09 × 0.07                                                                                                           |
| $T_{\min}, T_{\max}$                                                       | 0.719, 0.746                                                                        | 0.695, 0.745                                                                              | 0.642, 0.746                                                                                                                 |
| No. of measured, independent and observed [ $I > 2\sigma(I)$ ] reflections | 57149, 10039, 8444                                                                  | 57062, 3970, 3210                                                                         | 10395, 7045, 6942                                                                                                            |
| $R_{\text{int}}$                                                           | 0.043                                                                               | 0.075                                                                                     | 0.021                                                                                                                        |
| $q$ values (°)                                                             | $\theta_{\max} = 29.6, \theta_{\min} = 2.2$                                         | $\theta_{\max} = 26.4, \theta_{\min} = 2.3$                                               | $\theta_{\max} = 28.3, \theta_{\min} = 2.3$                                                                                  |
| $(\sin \theta/\lambda)_{\max}$ (Å <sup>-1</sup> )                          | 0.694                                                                               | 0.625                                                                                     | 0.668                                                                                                                        |
| Range of $h, k, l$                                                         | $-14 \leq h \leq 12,$<br>$-24 \leq k \leq 23,$<br>$-28 \leq l \leq 29$              | $-20 \leq h \leq 20,$<br>$-26 \leq k \leq 26,$<br>$-13 \leq l \leq 13$                    | $-13 \leq h \leq 12,$<br>$-13 \leq k \leq 13,$<br>$-13 \leq l \leq 12$                                                       |
| $R[F^2 > 2\sigma(F^2)],$<br>$wR(F^2), S$                                   | 0.033, 0.077, 1.06                                                                  | 0.061, 0.218, 1.13                                                                        | 0.029, 0.061, 1.02                                                                                                           |
| No. of parameters, restraints                                              | 474, 6                                                                              | 215, 5                                                                                    | 426, 3                                                                                                                       |
| H-atom treatment                                                           | H-atom parameters constrained                                                       | H atoms treated by a mixture of independent and constrained refinement                    | H-atom parameters constrained                                                                                                |
| Weighting scheme                                                           | $w = 1/[\sigma^2(F_o^2) + (0.0316P)^2 + 2.8122P]$<br>where $P = (F_o^2 + 2F_c^2)/3$ | $w = 1/[\sigma^2(F_o^2) + (0.1423P)^2 + 7.1875P]$<br>where $P = (F_o^2 + 2F_c^2)/3$       | $w = 1/[\sigma^2(F_o^2) + (0.0266P)^2]$<br>where $P = (F_o^2 + 2F_c^2)/3$                                                    |
| $\Delta\rho_{\max}, \Delta\rho_{\min}$ (e Å <sup>-3</sup> )                | 0.96, -0.61                                                                         | 1.61, -1.29                                                                               | 0.49, -0.32                                                                                                                  |
| Absolute structure                                                         | —                                                                                   | —                                                                                         | Flack x determined using 2498 quotients [(I+)-(I-)]/[(I+)+(I-)] (Parsons, Flack and Wagner, Acta Cryst. B69 (2013) 249-259). |
| Absolute structure parameter                                               | —                                                                                   | —                                                                                         | -0.001 (11)                                                                                                                  |

Computer programs: *APEX3* (Bruker-AXS, 2016), *SAINT* (Bruker-AXS, 2016), *SHELXT* 2014/5 (Sheldrick, 2014), *SHELXL* 2017/1 (Sheldrick, 2017).

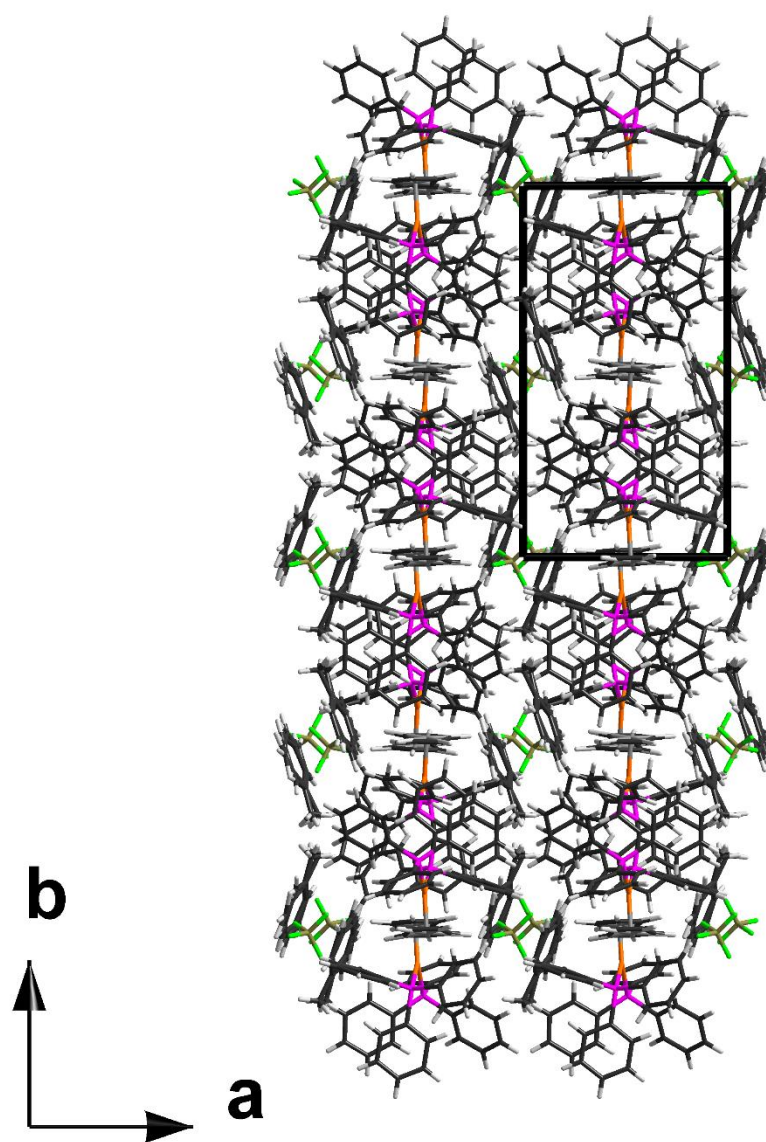

Figure S.1 – Crystal packing of **1**

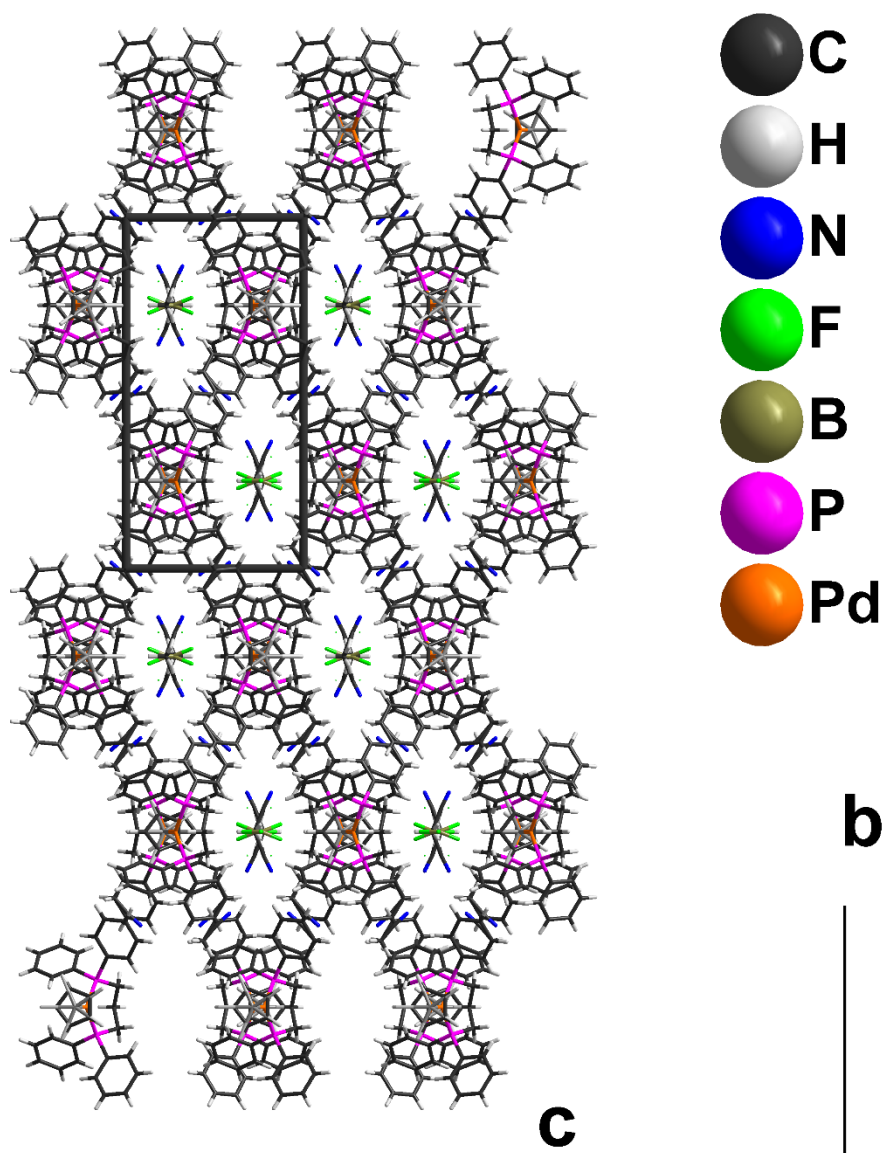

Figure S.2 – Crystal packing of **7**

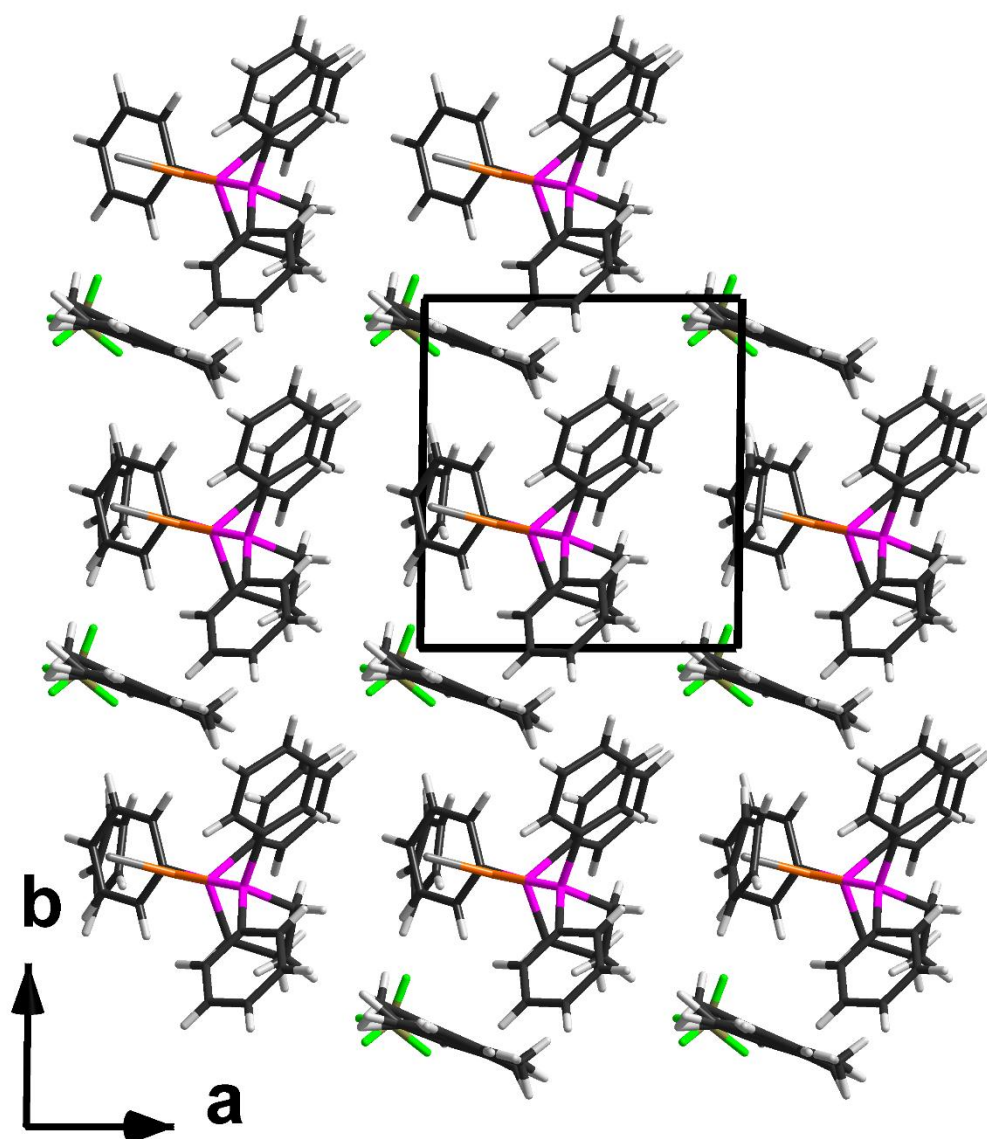

Figure S.3 – Crystal packing of **8**

## S.2 Computed Cartesian coordinates for palladium complexes

Table S.2 – Cartesian atomic coordinates (Å) for model structures

| Atom     | X         | Y         | Z         |
|----------|-----------|-----------|-----------|
| <b>7</b> |           |           |           |
| C        | 9.141966  | 15.892050 | 0.720686  |
| H        | 8.474341  | 15.892050 | 0.107245  |
| H        | 8.890566  | 15.892050 | 1.587226  |
| C        | 9.937788  | 14.620686 | 0.469733  |
| H        | 10.420892 | 14.710699 | -0.389761 |
| H        | 9.308473  | 13.861745 | 0.383165  |
| C        | 12.065530 | 12.819587 | 1.112131  |
| C        | 12.235350 | 11.639337 | 1.829600  |
| H        | 11.851491 | 11.555300 | 2.694670  |
| C        | 12.961247 | 10.586224 | 1.294447  |
| H        | 13.076574 | 9.785922  | 1.793576  |
| C        | 13.512328 | 10.702766 | 0.037536  |
| H        | 13.992136 | 9.975842  | -0.340814 |
| C        | 13.367482 | 11.870302 | -0.664919 |
| H        | 13.761364 | 11.951606 | -1.525807 |
| C        | 12.654905 | 12.934010 | -0.139419 |
| H        | 12.567897 | 13.740627 | -0.634118 |
| C        | 10.139241 | 13.590881 | 3.155148  |
| C        | 10.325710 | 14.057048 | 4.447450  |
| H        | 11.007520 | 14.695633 | 4.625380  |
| C        | 9.521563  | 13.595119 | 5.485582  |
| H        | 9.654439  | 13.920631 | 6.367854  |
| C        | 8.525953  | 12.662785 | 5.233556  |
| H        | 7.966014  | 12.363909 | 5.940408  |
| C        | 8.351138  | 12.166953 | 3.963775  |
| H        | 7.679434  | 11.516926 | 3.796709  |
| C        | 9.155285  | 12.620407 | 2.918136  |
| H        | 9.038059  | 12.268514 | 2.043511  |
| C        | 13.960187 | 15.892050 | 4.199714  |
| H        | 13.818670 | 15.892050 | 5.083413  |
| C        | 14.238225 | 17.002375 | 3.358913  |
| H        | 14.135001 | 17.777907 | 3.828647  |
| C        | 14.762668 | 16.521375 | 2.171711  |
| H        | 15.067345 | 16.993899 | 1.447808  |
| P        | 11.144674 | 14.237582 | 1.785415  |
| Pd       | 12.542358 | 15.892050 | 2.373546  |
| C        | 9.937788  | 17.163414 | 0.469733  |
| H        | 10.420892 | 17.073401 | -0.389761 |
| H        | 9.308473  | 17.922355 | 0.383165  |
| C        | 12.065530 | 18.964513 | 1.112131  |
| C        | 12.235350 | 20.144763 | 1.829600  |
| H        | 11.851491 | 20.228800 | 2.694670  |
| C        | 12.961247 | 21.197876 | 1.294447  |

| Atom | X         | Y         | Z         |
|------|-----------|-----------|-----------|
| H    | 13.076574 | 21.998178 | 1.793576  |
| C    | 13.512328 | 21.081334 | 0.037536  |
| H    | 13.992136 | 21.808258 | -0.340814 |
| C    | 13.367482 | 19.913798 | -0.664919 |
| H    | 13.761364 | 19.832494 | -1.525807 |
| C    | 12.654905 | 18.850090 | -0.139419 |
| H    | 12.567897 | 18.043473 | -0.634118 |
| C    | 10.139241 | 18.193219 | 3.155148  |
| C    | 10.325710 | 17.727052 | 4.447450  |
| H    | 11.007520 | 17.088467 | 4.625380  |
| C    | 9.521563  | 18.188981 | 5.485582  |
| H    | 9.654439  | 17.863469 | 6.367854  |
| C    | 8.525953  | 19.121315 | 5.233556  |
| H    | 7.966014  | 19.420191 | 5.940408  |
| C    | 8.351138  | 19.617147 | 3.963775  |
| H    | 7.679434  | 20.267174 | 3.796709  |
| C    | 9.155285  | 19.163693 | 2.918136  |
| H    | 9.038059  | 19.515586 | 2.043511  |
| P    | 11.144674 | 17.546518 | 1.785415  |
| C    | 14.238225 | 14.781725 | 3.358913  |
| H    | 14.135001 | 14.006193 | 3.828647  |
| C    | 14.762668 | 15.262725 | 2.171711  |
| H    | 15.067345 | 14.790201 | 1.447808  |
| C    | 17.466466 | 15.892050 | 4.641564  |
| H    | 16.798841 | 15.892050 | 5.255005  |
| H    | 17.215066 | 15.892050 | 3.775024  |
| C    | 18.262288 | 17.163414 | 4.892517  |
| H    | 18.745392 | 17.073401 | 5.752011  |
| H    | 17.632973 | 17.922355 | 4.979085  |
| C    | 20.390030 | 18.964513 | 4.250119  |
| C    | 20.559850 | 20.144763 | 3.532650  |
| H    | 20.175991 | 20.228800 | 2.667580  |
| C    | 21.285747 | 21.197876 | 4.067803  |
| H    | 21.401074 | 21.998178 | 3.568674  |
| C    | 21.836828 | 21.081334 | 5.324714  |
| H    | 22.316636 | 21.808258 | 5.703064  |
| C    | 21.691982 | 19.913798 | 6.027169  |
| H    | 22.085864 | 19.832494 | 6.888057  |
| C    | 20.979405 | 18.850090 | 5.501669  |
| H    | 20.892397 | 18.043473 | 5.996368  |
| C    | 18.463741 | 18.193219 | 2.207102  |
| C    | 18.650210 | 17.727052 | 0.914800  |
| H    | 19.332020 | 17.088467 | 0.736870  |
| C    | 17.846063 | 18.188981 | -0.123332 |
| H    | 17.978939 | 17.863469 | -1.005604 |
| C    | 16.850453 | 19.121315 | 0.128694  |
| H    | 16.290514 | 19.420191 | -0.578158 |
| C    | 16.675638 | 19.617147 | 1.398475  |
| H    | 16.003934 | 20.267174 | 1.565541  |

| Atom | X         | Y         | Z         |
|------|-----------|-----------|-----------|
| C    | 17.479785 | 19.163693 | 2.444114  |
| H    | 17.362559 | 19.515586 | 3.318739  |
| C    | 22.284687 | 15.892050 | 1.162536  |
| H    | 22.143170 | 15.892050 | 0.278837  |
| C    | 22.562725 | 14.781725 | 2.003337  |
| H    | 22.459501 | 14.006193 | 1.533604  |
| C    | 23.087168 | 15.262725 | 3.190539  |
| H    | 23.391845 | 14.790201 | 3.914443  |
| P    | 19.469174 | 17.546518 | 3.576835  |
| Pd   | 20.866858 | 15.892050 | 2.988704  |
| C    | 18.262288 | 14.620686 | 4.892517  |
| H    | 18.745392 | 14.710699 | 5.752011  |
| H    | 17.632973 | 13.861745 | 4.979085  |
| C    | 20.390030 | 12.819587 | 4.250119  |
| C    | 20.559850 | 11.639337 | 3.532650  |
| H    | 20.175991 | 11.555300 | 2.667580  |
| C    | 21.285747 | 10.586224 | 4.067803  |
| H    | 21.401074 | 9.785922  | 3.568674  |
| C    | 21.836828 | 10.702766 | 5.324714  |
| H    | 22.316636 | 9.975842  | 5.703064  |
| C    | 21.691982 | 11.870302 | 6.027169  |
| H    | 22.085864 | 11.951606 | 6.888057  |
| C    | 20.979405 | 12.934010 | 5.501669  |
| H    | 20.892397 | 13.740627 | 5.996368  |
| C    | 18.463741 | 13.590881 | 2.207102  |
| C    | 18.650210 | 14.057048 | 0.914800  |
| H    | 19.332020 | 14.695633 | 0.736870  |
| C    | 17.846063 | 13.595119 | -0.123332 |
| H    | 17.978939 | 13.920631 | -1.005604 |
| C    | 16.850453 | 12.662785 | 0.128694  |
| H    | 16.290514 | 12.363909 | -0.578158 |
| C    | 16.675638 | 12.166953 | 1.398475  |
| H    | 16.003934 | 11.516926 | 1.565541  |
| C    | 17.479785 | 12.620407 | 2.444114  |
| H    | 17.362559 | 12.268514 | 3.318739  |
| P    | 19.469174 | 14.237582 | 3.576835  |
| C    | 22.562725 | 17.002375 | 2.003337  |
| H    | 22.459501 | 17.777907 | 1.533604  |
| C    | 23.087168 | 16.521375 | 3.190539  |
| H    | 23.391845 | 16.993899 | 3.914443  |
| C    | 15.831534 | 26.486750 | -4.641564 |
| H    | 16.499159 | 26.486750 | -5.255005 |
| H    | 16.082934 | 26.486750 | -3.775024 |
| C    | 15.035712 | 27.758114 | -4.892517 |
| H    | 14.552608 | 27.668101 | -5.752011 |
| H    | 15.665027 | 28.517055 | -4.979085 |
| C    | 12.907970 | 29.559213 | -4.250119 |
| C    | 12.738150 | 30.739463 | -3.532650 |
| H    | 13.122009 | 30.823500 | -2.667580 |



| Atom | X         | Y         | Z         |
|------|-----------|-----------|-----------|
| C    | 12.012254 | 31.792576 | -4.067803 |
| H    | 11.896926 | 32.592878 | -3.568674 |
| C    | 11.461172 | 31.676034 | -5.324714 |
| H    | 10.981364 | 32.402958 | -5.703064 |
| C    | 11.606018 | 30.508498 | -6.027169 |
| H    | 11.212136 | 30.427194 | -6.888057 |
| C    | 12.318595 | 29.444790 | -5.501669 |
| H    | 12.405603 | 28.638173 | -5.996368 |
| C    | 14.834259 | 28.787919 | -2.207102 |
| C    | 14.647790 | 28.321752 | -0.914800 |
| H    | 13.965980 | 27.683167 | -0.736870 |
| C    | 15.451937 | 28.783681 | 0.123332  |
| H    | 15.319061 | 28.458169 | 1.005604  |
| C    | 16.447547 | 29.716015 | -0.128694 |
| H    | 17.007486 | 30.014891 | 0.578158  |
| C    | 16.622362 | 30.211847 | -1.398475 |
| H    | 17.294066 | 30.861874 | -1.565541 |
| C    | 15.818215 | 29.758393 | -2.444114 |
| H    | 15.935441 | 30.110286 | -3.318739 |
| C    | 11.013314 | 26.486750 | -1.162536 |
| H    | 11.154830 | 26.486750 | -0.278837 |
| C    | 10.735275 | 25.376425 | -2.003337 |
| H    | 10.838499 | 24.600893 | -1.533604 |
| C    | 10.210832 | 25.857425 | -3.190539 |
| H    | 9.906155  | 25.384901 | -3.914443 |
| P    | 13.828826 | 28.141218 | -3.576835 |
| Pd   | 12.431142 | 26.486750 | -2.988704 |
| C    | 15.035712 | 25.215386 | -4.892517 |
| H    | 14.552608 | 25.305399 | -5.752011 |
| H    | 15.665027 | 24.456445 | -4.979085 |
| C    | 12.907970 | 23.414287 | -4.250119 |
| C    | 12.738150 | 22.234037 | -3.532650 |
| H    | 13.122009 | 22.150000 | -2.667580 |
| C    | 12.012254 | 21.180924 | -4.067803 |
| H    | 11.896926 | 20.380622 | -3.568674 |
| C    | 11.461172 | 21.297466 | -5.324714 |
| H    | 10.981364 | 20.570542 | -5.703064 |
| C    | 11.606018 | 22.465002 | -6.027169 |
| H    | 11.212136 | 22.546306 | -6.888057 |
| C    | 12.318595 | 23.528710 | -5.501669 |
| H    | 12.405603 | 24.335327 | -5.996368 |
| C    | 14.834259 | 24.185581 | -2.207102 |
| C    | 14.647790 | 24.651748 | -0.914800 |
| H    | 13.965980 | 25.290333 | -0.736870 |
| C    | 15.451937 | 24.189819 | 0.123332  |
| H    | 15.319061 | 24.515331 | 1.005604  |
| C    | 16.447547 | 23.257485 | -0.128694 |
| H    | 17.007486 | 22.958609 | 0.578158  |
| C    | 16.622362 | 22.761653 | -1.398475 |

| Atom | X         | Y         | Z         |
|------|-----------|-----------|-----------|
| H    | 17.294066 | 22.111626 | -1.565541 |
| C    | 15.818215 | 23.215107 | -2.444114 |
| H    | 15.935441 | 22.863214 | -3.318739 |
| P    | 13.828826 | 24.832282 | -3.576835 |
| C    | 10.735275 | 27.597075 | -2.003337 |
| H    | 10.838499 | 28.372607 | -1.533604 |
| C    | 10.210832 | 27.116075 | -3.190539 |
| H    | 9.906155  | 27.588599 | -3.914443 |
| 8    |           |           |           |
| C    | 5.814225  | 2.107158  | 3.143239  |
| H    | 5.376353  | 1.552299  | 3.837020  |
| H    | 5.370704  | 1.899813  | 2.283152  |
| C    | 7.252533  | 1.656694  | 3.037448  |
| H    | 7.678981  | 2.166469  | 2.304041  |
| H    | 7.255127  | 0.702884  | 2.772075  |
| C    | 8.646072  | 3.240563  | 4.569621  |
| H    | 8.519565  | 3.789311  | 3.755104  |
| H    | 9.616289  | 3.206398  | 4.763460  |
| C    | 8.654421  | 5.612911  | 6.264961  |
| C    | 9.507417  | 6.197552  | 5.324500  |
| H    | 9.698846  | 5.746743  | 4.510189  |
| C    | 10.075657 | 7.441820  | 5.582701  |
| H    | 10.650298 | 7.838219  | 4.938265  |
| C    | 9.817747  | 8.096770  | 6.743709  |
| H    | 10.207905 | 8.947787  | 6.906528  |
| C    | 8.978310  | 7.519518  | 7.700308  |
| H    | 8.802624  | 7.975131  | 8.514897  |
| C    | 8.406245  | 6.289855  | 7.460038  |
| H    | 7.837727  | 5.899006  | 8.113726  |
| C    | 8.335647  | 2.991982  | 7.347075  |
| C    | 9.696827  | 2.994250  | 7.685067  |
| H    | 10.283968 | 3.610530  | 7.263805  |
| C    | 10.192437 | 2.114280  | 8.621046  |
| H    | 11.118966 | 2.111414  | 8.830036  |
| C    | 9.346019  | 1.247862  | 9.245032  |
| H    | 9.691132  | 0.636526  | 9.884922  |
| C    | 7.981270  | 1.242509  | 8.959038  |
| H    | 7.399152  | 0.641032  | 9.408909  |
| C    | 7.479488  | 2.126137  | 8.007818  |
| H    | 6.549807  | 2.135273  | 7.811550  |
| C    | 3.787919  | 4.123186  | 2.906555  |
| C    | 3.384293  | 5.423434  | 2.620561  |
| H    | 4.000070  | 6.141334  | 2.707148  |
| C    | 2.076176  | 5.674720  | 2.207260  |
| H    | 1.801305  | 6.564216  | 2.017662  |
| C    | 1.180618  | 4.631623  | 2.072781  |
| H    | 0.296407  | 4.803875  | 1.772613  |
| C    | 1.563032  | 3.352972  | 2.370429  |
| H    | 0.938997  | 2.640625  | 2.297864  |

| Atom | X         | Y         | Z         |
|------|-----------|-----------|-----------|
| C    | 2.875772  | 3.097717  | 2.783730  |
| H    | 3.141165  | 2.207656  | 2.981433  |
| C    | 3.361022  | 4.646271  | 6.196825  |
| H    | 2.611720  | 4.349445  | 5.604675  |
| C    | 3.910700  | 5.963588  | 6.221928  |
| H    | 3.637061  | 6.729090  | 5.639927  |
| C    | 4.820075  | 6.011559  | 7.245767  |
| H    | 5.332643  | 6.818916  | 7.537247  |
| C    | 4.862805  | 4.716872  | 7.865270  |
| H    | 5.382465  | 4.487934  | 8.688600  |
| C    | 3.877715  | 3.903701  | 7.274456  |
| H    | 3.579365  | 3.000411  | 7.581930  |
| C    | 6.485867  | 4.843588  | 2.400015  |
| C    | 7.104502  | 5.998550  | 2.829453  |
| H    | 7.019627  | 6.266261  | 3.736976  |
| C    | 7.847409  | 6.774597  | 1.954438  |
| H    | 8.259342  | 7.573021  | 2.261043  |
| C    | 7.988154  | 6.387976  | 0.638330  |
| H    | 8.505420  | 6.914472  | 0.039716  |
| C    | 7.368632  | 5.221386  | 0.190961  |
| H    | 7.467925  | 4.948659  | -0.713307 |
| C    | 6.609135  | 4.458958  | 1.064183  |
| H    | 6.172895  | 3.674486  | 0.753768  |
| C    | 8.134962  | 1.803249  | 4.294385  |
| H    | 8.917003  | 1.203041  | 4.201272  |
| H    | 7.616441  | 1.497286  | 5.080294  |
| P    | 5.471063  | 3.851823  | 3.535113  |
| P    | 7.788989  | 4.041005  | 5.964265  |
| Pd   | 5.567994  | 4.376724  | 5.734215  |
| C    | 0.390965  | 3.456766  | 12.108553 |
| H    | -0.046907 | 2.901907  | 12.802334 |
| H    | -0.052556 | 3.249422  | 11.248466 |
| C    | 1.829273  | 3.006302  | 12.002762 |
| H    | 2.255721  | 3.516078  | 11.269355 |
| H    | 1.831867  | 2.052493  | 11.737389 |
| C    | 3.222812  | 4.590172  | 13.534935 |
| H    | 3.096305  | 5.138920  | 12.720418 |
| H    | 4.193029  | 4.556006  | 13.728774 |
| C    | 3.231161  | 6.962519  | 15.230275 |
| C    | 4.084157  | 7.547161  | 14.289814 |
| H    | 4.275586  | 7.096352  | 13.475503 |
| C    | 4.652397  | 8.791428  | 14.548015 |
| H    | 5.227038  | 9.187827  | 13.903579 |
| C    | 4.394487  | 9.446378  | 15.709023 |
| H    | 4.784645  | 10.297395 | 15.871842 |
| C    | 3.555050  | 8.869126  | 16.665622 |
| H    | 3.379364  | 9.324739  | 17.480211 |
| C    | 2.982985  | 7.639463  | 16.425352 |
| H    | 2.414467  | 7.248614  | 17.079040 |

| Atom | X         | Y        | Z         |
|------|-----------|----------|-----------|
| C    | 2.912387  | 4.341591 | 16.312389 |
| C    | 4.273567  | 4.343858 | 16.650381 |
| H    | 4.860708  | 4.960139 | 16.229119 |
| C    | 4.769177  | 3.463889 | 17.586360 |
| H    | 5.695706  | 3.461023 | 17.795350 |
| C    | 3.922759  | 2.597471 | 18.210346 |
| H    | 4.267872  | 1.986134 | 18.850236 |
| C    | 2.558010  | 2.592118 | 17.924352 |
| H    | 1.975892  | 1.990640 | 18.374223 |
| C    | 2.056228  | 3.475746 | 16.973132 |
| H    | 1.126547  | 3.484882 | 16.776864 |
| C    | -1.635341 | 5.472795 | 11.871869 |
| C    | -2.038967 | 6.773043 | 11.585875 |
| H    | -1.423190 | 7.490943 | 11.672462 |
| C    | -3.347084 | 7.024329 | 11.172574 |
| H    | -3.621955 | 7.913825 | 10.982976 |
| C    | -4.242642 | 5.981232 | 11.038095 |
| H    | -5.126853 | 6.153484 | 10.737927 |
| C    | -3.860229 | 4.702580 | 11.335743 |
| H    | -4.484263 | 3.990234 | 11.263178 |
| C    | -2.547488 | 4.447326 | 11.749044 |
| H    | -2.282095 | 3.557264 | 11.946747 |
| C    | -2.062238 | 5.995880 | 15.162139 |
| H    | -2.811540 | 5.699054 | 14.569989 |
| C    | -1.512560 | 7.313196 | 15.187242 |
| H    | -1.786199 | 8.078699 | 14.605241 |
| C    | -0.603185 | 7.361167 | 16.211081 |
| H    | -0.090617 | 8.168524 | 16.502561 |
| C    | -0.560455 | 6.066480 | 16.830584 |
| H    | -0.040795 | 5.837542 | 17.653914 |
| C    | -1.545545 | 5.253310 | 16.239770 |
| H    | -1.843895 | 4.350019 | 16.547244 |
| C    | 1.062607  | 6.193197 | 11.365329 |
| C    | 1.681242  | 7.348158 | 11.794767 |
| H    | 1.596367  | 7.615870 | 12.702290 |
| C    | 2.424149  | 8.124206 | 10.919752 |
| H    | 2.836082  | 8.922629 | 11.226357 |
| C    | 2.564894  | 7.737585 | 9.603644  |
| H    | 3.082160  | 8.264080 | 9.005030  |
| C    | 1.945372  | 6.570995 | 9.156275  |
| H    | 2.044665  | 6.298268 | 8.252007  |
| C    | 1.185875  | 5.808567 | 10.029497 |
| H    | 0.749635  | 5.024094 | 9.719082  |
| C    | 2.711702  | 3.152857 | 13.259699 |
| H    | 3.493743  | 2.552649 | 13.166586 |
| H    | 2.193181  | 2.846895 | 14.045608 |
| P    | 0.047803  | 5.201431 | 12.500427 |
| P    | 2.365729  | 5.390613 | 14.929579 |
| Pd   | 0.144734  | 5.726333 | 14.699529 |

| Atom | X         | Y         | Z         |
|------|-----------|-----------|-----------|
| C    | 1.288585  | 0.757549  | -5.822075 |
| H    | 0.850713  | 0.202690  | -5.128294 |
| H    | 0.845064  | 0.550205  | -6.682162 |
| C    | 2.726893  | 0.307085  | -5.927866 |
| H    | 3.153341  | 0.816860  | -6.661273 |
| H    | 2.729488  | -0.646724 | -6.193239 |
| C    | 4.120432  | 1.890955  | -4.395693 |
| H    | 3.993925  | 2.439702  | -5.210210 |
| H    | 5.090649  | 1.856789  | -4.201854 |
| C    | 4.128781  | 4.263302  | -2.700353 |
| C    | 4.981777  | 4.847944  | -3.640814 |
| H    | 5.173206  | 4.397135  | -4.455125 |
| C    | 5.550017  | 6.092211  | -3.382613 |
| H    | 6.124658  | 6.488610  | -4.027049 |
| C    | 5.292107  | 6.747161  | -2.221605 |
| H    | 5.682265  | 7.598178  | -2.058786 |
| C    | 4.452670  | 6.169909  | -1.265006 |
| H    | 4.276984  | 6.625522  | -0.450417 |
| C    | 3.880605  | 4.940246  | -1.505276 |
| H    | 3.312087  | 4.549397  | -0.851588 |
| C    | 3.810007  | 1.642374  | -1.618239 |
| C    | 5.171187  | 1.644641  | -1.280247 |
| H    | 5.758328  | 2.260922  | -1.701509 |
| C    | 5.666797  | 0.764672  | -0.344268 |
| H    | 6.593326  | 0.761806  | -0.135278 |
| C    | 4.820379  | -0.101746 | 0.279718  |
| H    | 5.165492  | -0.713083 | 0.919608  |
| C    | 3.455630  | -0.107099 | -0.006276 |
| H    | 2.873512  | -0.708577 | 0.443595  |
| C    | 2.953848  | 0.776529  | -0.957496 |
| H    | 2.024167  | 0.785665  | -1.153764 |
| C    | -0.737721 | 2.773578  | -6.058759 |
| C    | -1.141347 | 4.073826  | -6.344753 |
| H    | -0.525570 | 4.791726  | -6.258166 |
| C    | -2.449464 | 4.325112  | -6.758054 |
| H    | -2.724335 | 5.214608  | -6.947652 |
| C    | -3.345022 | 3.282015  | -6.892533 |
| H    | -4.229233 | 3.454266  | -7.192701 |
| C    | -2.962608 | 2.003363  | -6.594885 |
| H    | -3.586643 | 1.291016  | -6.667450 |
| C    | -1.649868 | 1.748109  | -6.181584 |
| H    | -1.384475 | 0.858047  | -5.983881 |
| C    | -1.164618 | 3.296663  | -2.768489 |
| H    | -1.913920 | 2.999837  | -3.360639 |
| C    | -0.614940 | 4.613979  | -2.743386 |
| H    | -0.888579 | 5.379481  | -3.325387 |
| C    | 0.294435  | 4.661950  | -1.719547 |
| H    | 0.807003  | 5.469307  | -1.428067 |
| C    | 0.337165  | 3.367263  | -1.100044 |

| Atom     | X         | Y         | Z         |
|----------|-----------|-----------|-----------|
| H        | 0.856825  | 3.138325  | -0.276714 |
| C        | -0.647925 | 2.554093  | -1.690858 |
| H        | -0.946275 | 1.650802  | -1.383384 |
| C        | 1.960227  | 3.493979  | -6.565299 |
| C        | 2.578862  | 4.648941  | -6.135861 |
| H        | 2.493987  | 4.916652  | -5.228338 |
| C        | 3.321769  | 5.424989  | -7.010876 |
| H        | 3.733702  | 6.223412  | -6.704271 |
| C        | 3.462514  | 5.038368  | -8.326984 |
| H        | 3.979780  | 5.564863  | -8.925598 |
| C        | 2.842992  | 3.871778  | -8.774353 |
| H        | 2.942285  | 3.599050  | -9.678621 |
| C        | 2.083495  | 3.109350  | -7.901131 |
| H        | 1.647255  | 2.324877  | -8.211546 |
| C        | 3.609322  | 0.453640  | -4.670929 |
| H        | 4.391363  | -0.146568 | -4.764042 |
| H        | 3.090801  | 0.147677  | -3.885020 |
| P        | 0.945423  | 2.502214  | -5.430201 |
| P        | 3.263349  | 2.691396  | -3.001049 |
| Pd       | 1.042354  | 3.027115  | -3.231099 |
| C        | 5.444138  | -1.154883 | 4.948853  |
| H        | 6.302341  | -1.545824 | 4.830986  |
| C        | 5.094386  | -0.534814 | 6.168136  |
| H        | 5.716512  | -0.504561 | 6.885460  |
| C        | 3.926963  | -0.011981 | 6.299926  |
| H        | 3.709345  | 0.371585  | 7.141330  |
| C        | 2.933763  | 0.033441  | 5.276984  |
| C        | 1.616994  | 0.673104  | 5.440153  |
| H        | 1.554821  | 1.068334  | 6.334586  |
| H        | 1.509047  | 1.375015  | 4.764580  |
| H        | 0.912045  | 0.001821  | 5.329368  |
| C        | 3.279422  | -0.596929 | 4.107907  |
| H        | 2.652699  | -0.635471 | 3.394501  |
| C        | 4.527666  | -1.180090 | 3.951014  |
| H        | 4.744981  | -1.603875 | 3.129388  |
| <b>1</b> |           |           |           |
| C        | 4.131747  | 9.614030  | 14.260867 |
| H        | 5.127456  | 9.696864  | 14.214576 |
| C        | 3.206414  | 9.720242  | 13.153041 |
| H        | 3.459042  | 9.937032  | 12.210288 |
| C        | 1.884451  | 9.721366  | 13.663530 |
| H        | 1.048642  | 9.917569  | 13.150070 |
| C        | 1.971141  | 9.423896  | 15.027327 |
| H        | 1.201863  | 9.396678  | 15.665885 |
| C        | 3.377051  | 9.394861  | 15.397572 |
| H        | 3.733797  | 9.307268  | 16.327485 |
| C        | 2.324095  | 6.442072  | 10.791120 |
| C        | 1.538230  | 7.581377  | 10.645266 |
| H        | 1.562423  | 8.256155  | 11.313514 |

| Atom | X         | Y        | Z         |
|------|-----------|----------|-----------|
| C    | 0.718776  | 7.744911 | 9.535778  |
| H    | 0.200659  | 8.535399 | 9.440827  |
| C    | 0.657441  | 6.760523 | 8.571521  |
| H    | 0.091124  | 6.867710 | 7.816342  |
| C    | 1.423193  | 5.617097 | 8.708233  |
| H    | 1.378581  | 4.937598 | 8.045740  |
| C    | 2.253401  | 5.455999 | 9.803593  |
| H    | 2.778657  | 4.668788 | 9.884768  |
| C    | 5.095479  | 6.829833 | 11.506469 |
| C    | 5.375483  | 6.704701 | 10.142049 |
| H    | 4.701580  | 6.410864 | 9.540349  |
| C    | 6.647053  | 7.013598 | 9.672282  |
| H    | 6.838082  | 6.935802 | 8.744946  |
| C    | 7.627600  | 7.429270 | 10.535564 |
| H    | 8.492630  | 7.635495 | 10.201263 |
| C    | 7.368882  | 7.551030 | 11.886687 |
| H    | 8.054690  | 7.831492 | 12.481822 |
| C    | 6.098097  | 7.259929 | 12.369335 |
| H    | 5.913454  | 7.355670 | 13.296173 |
| C    | 3.702123  | 4.520877 | 12.447249 |
| C    | 4.971940  | 4.001803 | 12.731269 |
| H    | 5.728425  | 4.576213 | 12.742426 |
| C    | 5.124455  | 2.645390 | 12.996798 |
| H    | 5.985586  | 2.297735 | 13.195363 |
| C    | 4.034059  | 1.801120 | 12.974359 |
| H    | 4.146998  | 0.874747 | 13.152563 |
| C    | 2.776582  | 2.304460 | 12.691585 |
| H    | 2.025375  | 1.722463 | 12.676481 |
| C    | 2.608682  | 3.657314 | 12.430004 |
| H    | 1.742667  | 3.996764 | 12.237921 |
| C    | 3.772622  | 4.963711 | 15.768648 |
| C    | 4.986122  | 5.663928 | 15.790879 |
| H    | 4.990262  | 6.601204 | 15.635780 |
| C    | 6.179220  | 5.005110 | 16.036255 |
| H    | 6.997059  | 5.487806 | 16.044670 |
| C    | 6.175284  | 3.638019 | 16.269580 |
| H    | 6.991829  | 3.182073 | 16.436543 |
| C    | 4.986363  | 2.941361 | 16.258984 |
| H    | 4.988164  | 2.005790 | 16.424202 |
| C    | 3.782542  | 3.593249 | 16.009245 |
| H    | 2.968461  | 3.103378 | 16.002846 |
| C    | 1.718249  | 6.571326 | 17.026691 |
| C    | 2.553874  | 6.617782 | 18.145113 |
| H    | 3.449350  | 6.308042 | 18.082450 |
| C    | 2.074032  | 7.116439 | 19.348097 |
| H    | 2.643624  | 7.141203 | 20.108158 |
| C    | 0.773463  | 7.578380 | 19.449696 |
| H    | 0.450267  | 7.916106 | 20.276846 |
| C    | -0.057818 | 7.545785 | 18.337300 |

| Atom | X         | Y         | Z         |
|------|-----------|-----------|-----------|
| H    | -0.949109 | 7.867158  | 18.403017 |
| C    | 0.410140  | 7.046005  | 17.130576 |
| H    | -0.162537 | 7.026579  | 16.372550 |
| C    | 0.867610  | 4.975513  | 14.857995 |
| C    | 0.435282  | 3.831900  | 15.527636 |
| H    | 0.916162  | 3.517064  | 16.284435 |
| C    | -0.690984 | 3.152476  | 15.094437 |
| H    | -0.969240 | 2.361800  | 15.541826 |
| C    | -1.411822 | 3.621535  | 14.013829 |
| H    | -2.175990 | 3.145095  | 13.712231 |
| C    | -1.024428 | 4.783693  | 13.367667 |
| H    | -1.534379 | 5.115425  | 12.637981 |
| C    | 0.113279  | 5.464054  | 13.789854 |
| H    | 0.377916  | 6.263347  | 13.349923 |
| P    | 3.480906  | 6.317877  | 12.195432 |
| P    | 2.297014  | 5.968143  | 15.401520 |
| Pd   | 2.864715  | 7.630081  | 13.965626 |
| C    | 0.640024  | 18.980230 | 16.904523 |
| H    | -0.355685 | 19.063064 | 16.950814 |
| C    | 1.565357  | 19.086442 | 18.012348 |
| H    | 1.312729  | 19.303232 | 18.955101 |
| C    | 2.887320  | 19.087566 | 17.501859 |
| H    | 3.723129  | 19.283769 | 18.015319 |
| C    | 2.800631  | 18.790096 | 16.138062 |
| H    | 3.569908  | 18.762878 | 15.499504 |
| C    | 1.394720  | 18.761061 | 15.767817 |
| H    | 1.037975  | 18.673468 | 14.837904 |
| C    | 2.447677  | 15.808272 | 20.374269 |
| C    | 3.233541  | 16.947577 | 20.520123 |
| H    | 3.209348  | 17.622355 | 19.851875 |
| C    | 4.052995  | 17.111111 | 21.629611 |
| H    | 4.571112  | 17.901599 | 21.724562 |
| C    | 4.114330  | 16.126723 | 22.593868 |
| H    | 4.680647  | 16.233910 | 23.349047 |
| C    | 3.348579  | 14.983297 | 22.457156 |
| H    | 3.393190  | 14.303798 | 23.119649 |
| C    | 2.518370  | 14.822199 | 21.361797 |
| H    | 1.993114  | 14.034988 | 21.280621 |
| C    | -0.323707 | 16.196033 | 19.658920 |
| C    | -0.603712 | 16.070901 | 21.023341 |
| H    | 0.070191  | 15.777064 | 21.625040 |
| C    | -1.875281 | 16.379798 | 21.493107 |
| H    | -2.066311 | 16.302002 | 22.420443 |
| C    | -2.855829 | 16.795470 | 20.629826 |
| H    | -3.720859 | 17.001695 | 20.964126 |
| C    | -2.597111 | 16.917230 | 19.278702 |
| H    | -3.282919 | 17.197692 | 18.683568 |
| C    | -1.326326 | 16.626129 | 18.796054 |
| H    | -1.141683 | 16.721870 | 17.869216 |



| Atom | X         | Y         | Z         |
|------|-----------|-----------|-----------|
| C    | 1.069648  | 13.887077 | 18.718141 |
| C    | -0.200169 | 13.368003 | 18.434120 |
| H    | -0.956654 | 13.942413 | 18.422963 |
| C    | -0.352684 | 12.011590 | 18.168591 |
| H    | -1.213815 | 11.663935 | 17.970026 |
| C    | 0.737713  | 11.167320 | 18.191030 |
| H    | 0.624774  | 10.240947 | 18.012826 |
| C    | 1.995190  | 11.670660 | 18.473804 |
| H    | 2.746396  | 11.088663 | 18.488909 |
| C    | 2.163090  | 13.023514 | 18.735385 |
| H    | 3.029104  | 13.362964 | 18.927468 |
| C    | 0.999150  | 14.329911 | 15.396741 |
| C    | -0.214351 | 15.030128 | 15.374510 |
| H    | -0.218491 | 15.967404 | 15.529610 |
| C    | -1.407449 | 14.371310 | 15.129134 |
| H    | -2.225288 | 14.854006 | 15.120720 |
| C    | -1.403513 | 13.004219 | 14.895809 |
| H    | -2.220058 | 12.548273 | 14.728846 |
| C    | -0.214592 | 12.307561 | 14.906406 |
| H    | -0.216393 | 11.371990 | 14.741188 |
| C    | 0.989229  | 12.959449 | 15.156144 |
| H    | 1.803310  | 12.469578 | 15.162544 |
| C    | 3.053522  | 15.937526 | 14.138698 |
| C    | 2.217897  | 15.983982 | 13.020276 |
| H    | 1.322421  | 15.674242 | 13.082940 |
| C    | 2.697739  | 16.482639 | 11.817292 |
| H    | 2.128148  | 16.507403 | 11.057231 |
| C    | 3.998309  | 16.944580 | 11.715693 |
| H    | 4.321505  | 17.282306 | 10.888543 |
| C    | 4.829589  | 16.911985 | 12.828090 |
| H    | 5.720880  | 17.233358 | 12.762372 |
| C    | 4.361631  | 16.412205 | 14.034814 |
| H    | 4.934308  | 16.392779 | 14.792839 |
| C    | 3.904161  | 14.341713 | 16.307394 |
| C    | 4.336489  | 13.198100 | 15.637753 |
| H    | 3.855609  | 12.883264 | 14.880954 |
| C    | 5.462755  | 12.518676 | 16.070952 |
| H    | 5.741011  | 11.728000 | 15.623563 |
| C    | 6.183594  | 12.987735 | 17.151560 |
| H    | 6.947761  | 12.511295 | 17.453158 |
| C    | 5.796199  | 14.149893 | 17.797723 |
| H    | 6.306150  | 14.481625 | 18.527408 |
| C    | 4.658492  | 14.830254 | 17.375536 |
| H    | 4.393855  | 15.629547 | 17.815466 |
| P    | 1.290865  | 15.684077 | 18.969957 |
| P    | 2.474757  | 15.334343 | 15.763869 |
| Pd   | 1.907056  | 16.996281 | 17.199763 |
| C    | 2.540667  | 9.118370  | 6.516060  |
| H    | 1.544958  | 9.035536  | 6.562351  |

| Atom | X         | Y         | Z         |
|------|-----------|-----------|-----------|
| C    | 3.466000  | 9.012158  | 7.623885  |
| H    | 3.213372  | 8.795368  | 8.566638  |
| C    | 4.787963  | 9.011034  | 7.113396  |
| H    | 5.623772  | 8.814831  | 7.626856  |
| C    | 4.701274  | 9.308504  | 5.749599  |
| H    | 5.470551  | 9.335722  | 5.111041  |
| C    | 3.295363  | 9.337539  | 5.379354  |
| H    | 2.938618  | 9.425132  | 4.449441  |
| C    | 4.348320  | 12.290328 | 9.985806  |
| C    | 5.134184  | 11.151023 | 10.131660 |
| H    | 5.109991  | 10.476245 | 9.463412  |
| C    | 5.953638  | 10.987489 | 11.241148 |
| H    | 6.471755  | 10.197001 | 11.336099 |
| C    | 6.014973  | 11.971877 | 12.205405 |
| H    | 6.581290  | 11.864690 | 12.960584 |
| C    | 5.249221  | 13.115303 | 12.068693 |
| H    | 5.293833  | 13.794802 | 12.731186 |
| C    | 4.419013  | 13.276401 | 10.973334 |
| H    | 3.893757  | 14.063612 | 10.892158 |
| C    | 1.576936  | 11.902567 | 9.270457  |
| C    | 1.296931  | 12.027699 | 10.634877 |
| H    | 1.970834  | 12.321536 | 11.236577 |
| C    | 0.025361  | 11.718802 | 11.104644 |
| H    | -0.165668 | 11.796598 | 12.031980 |
| C    | -0.955186 | 11.303130 | 10.241362 |
| H    | -1.820216 | 11.096905 | 10.575663 |
| C    | -0.696468 | 11.181370 | 8.890239  |
| H    | -1.382276 | 10.900908 | 8.295105  |
| C    | 0.574317  | 11.472471 | 8.407591  |
| H    | 0.758960  | 11.376730 | 7.480753  |
| C    | 2.970291  | 14.211523 | 8.329677  |
| C    | 1.700474  | 14.730597 | 8.045657  |
| H    | 0.943989  | 14.156187 | 8.034500  |
| C    | 1.547959  | 16.087010 | 7.780128  |
| H    | 0.686828  | 16.434665 | 7.581563  |
| C    | 2.638355  | 16.931280 | 7.802567  |
| H    | 2.525417  | 17.857653 | 7.624363  |
| C    | 3.895832  | 16.427940 | 8.085341  |
| H    | 4.647039  | 17.009937 | 8.100446  |
| C    | 4.063732  | 15.075086 | 8.346922  |
| H    | 4.929747  | 14.735636 | 8.539005  |
| C    | 2.899793  | 13.768689 | 5.008278  |
| C    | 1.686292  | 13.068472 | 4.986047  |
| H    | 1.682152  | 12.131196 | 5.141146  |
| C    | 0.493194  | 13.727290 | 4.740671  |
| H    | -0.324645 | 13.244594 | 4.732257  |
| C    | 0.497130  | 15.094381 | 4.507346  |
| H    | -0.319415 | 15.550327 | 4.340383  |
| C    | 1.686051  | 15.791039 | 4.517943  |

| Atom | X        | Y         | Z        |
|------|----------|-----------|----------|
| H    | 1.684250 | 16.726610 | 4.352724 |
| C    | 2.889872 | 15.139151 | 4.767681 |
| H    | 3.703953 | 15.629022 | 4.774081 |
| C    | 4.954165 | 12.161074 | 3.750235 |
| C    | 4.118540 | 12.114618 | 2.631813 |
| H    | 3.223064 | 12.424358 | 2.694476 |
| C    | 4.598382 | 11.615961 | 1.428829 |
| H    | 4.028790 | 11.591197 | 0.668768 |
| C    | 5.898952 | 11.154020 | 1.327230 |
| H    | 6.222147 | 10.816294 | 0.500080 |
| C    | 6.730232 | 11.186615 | 2.439627 |
| H    | 7.621523 | 10.865242 | 2.373909 |
| C    | 6.262274 | 11.686395 | 3.646351 |
| H    | 6.834951 | 11.705821 | 4.404376 |
| C    | 5.804804 | 13.756887 | 5.918931 |
| C    | 6.237132 | 14.900500 | 5.249290 |
| H    | 5.756252 | 15.215336 | 4.492491 |
| C    | 7.363398 | 15.579924 | 5.682489 |
| H    | 7.641654 | 16.370600 | 5.235100 |
| C    | 8.084236 | 15.110865 | 6.763097 |
| H    | 8.848404 | 15.587305 | 7.064695 |
| C    | 7.696842 | 13.948707 | 7.409260 |
| H    | 8.206793 | 13.616975 | 8.138945 |
| C    | 6.559135 | 13.268346 | 6.987073 |
| H    | 6.294498 | 12.469053 | 7.427003 |
| P    | 3.191508 | 12.414523 | 8.581494 |
| P    | 4.375400 | 12.764257 | 5.375406 |
| Pd   | 3.807699 | 11.102319 | 6.811300 |

### S.3 NMR spectra

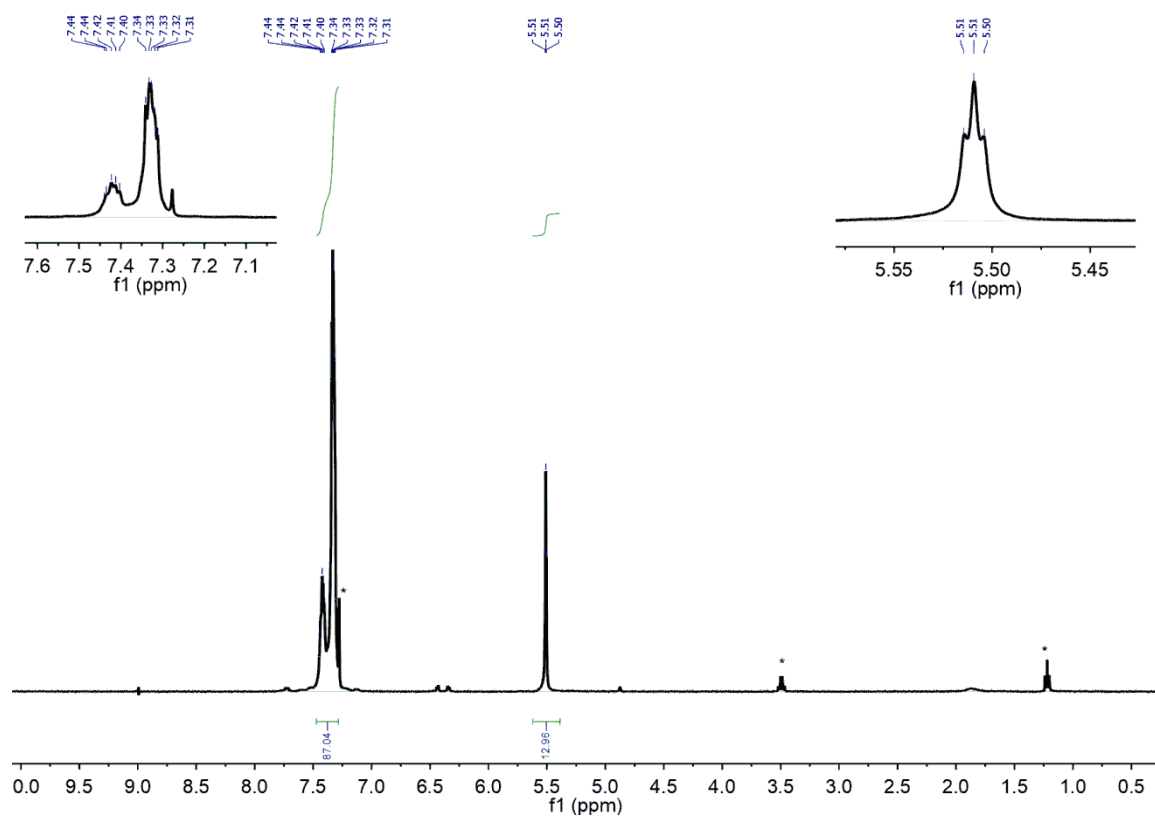

Figure S.4 –  $^1\text{H}$  NMR (400 MHz,  $\text{CDCl}_3$ ,  $25^\circ\text{C}$ ) spectrum of **1**

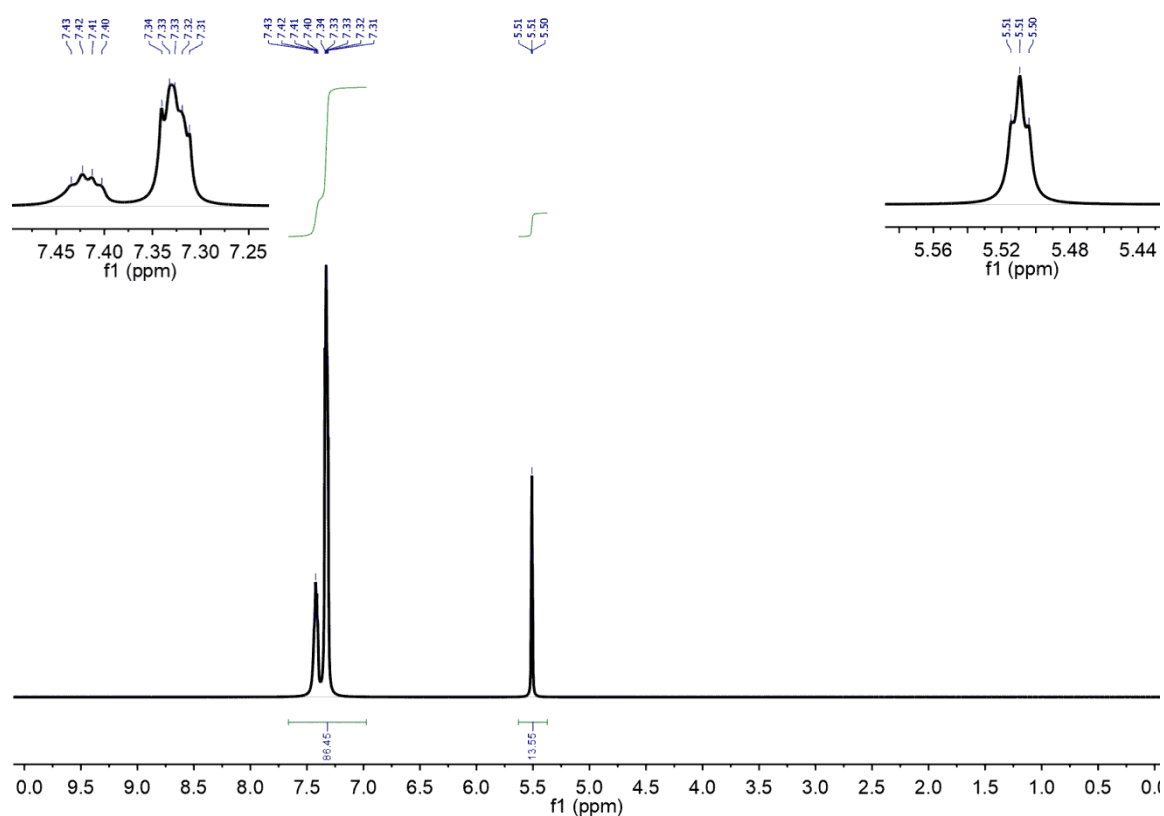

Figure S.5 –  $^1\text{H}$  (deconvoluted) NMR (400 MHz,  $\text{CDCl}_3$ ,  $25^\circ\text{C}$ ) spectrum of **1**

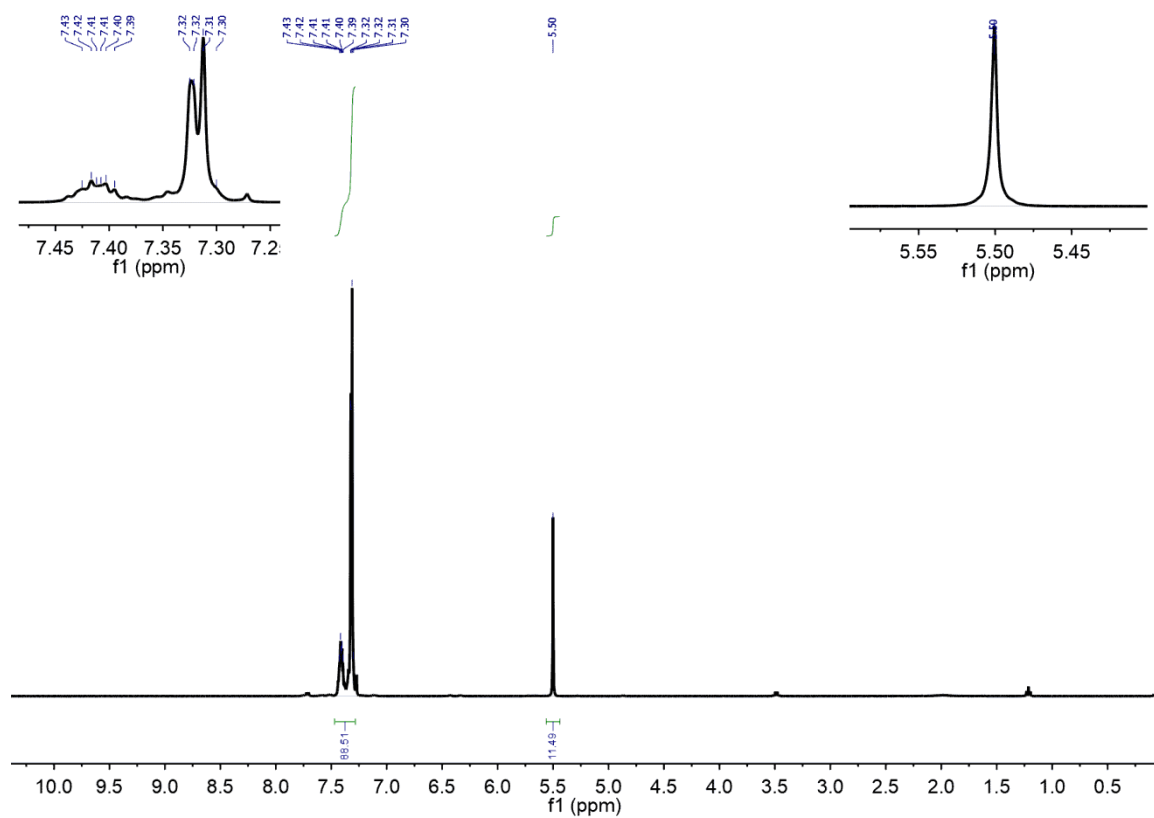

Figure S.6 –  $^1\text{H}\{^{31}\text{P}\}$  NMR (400 MHz,  $\text{CDCl}_3$ ,  $25^\circ\text{C}$ ) spectrum of **1**

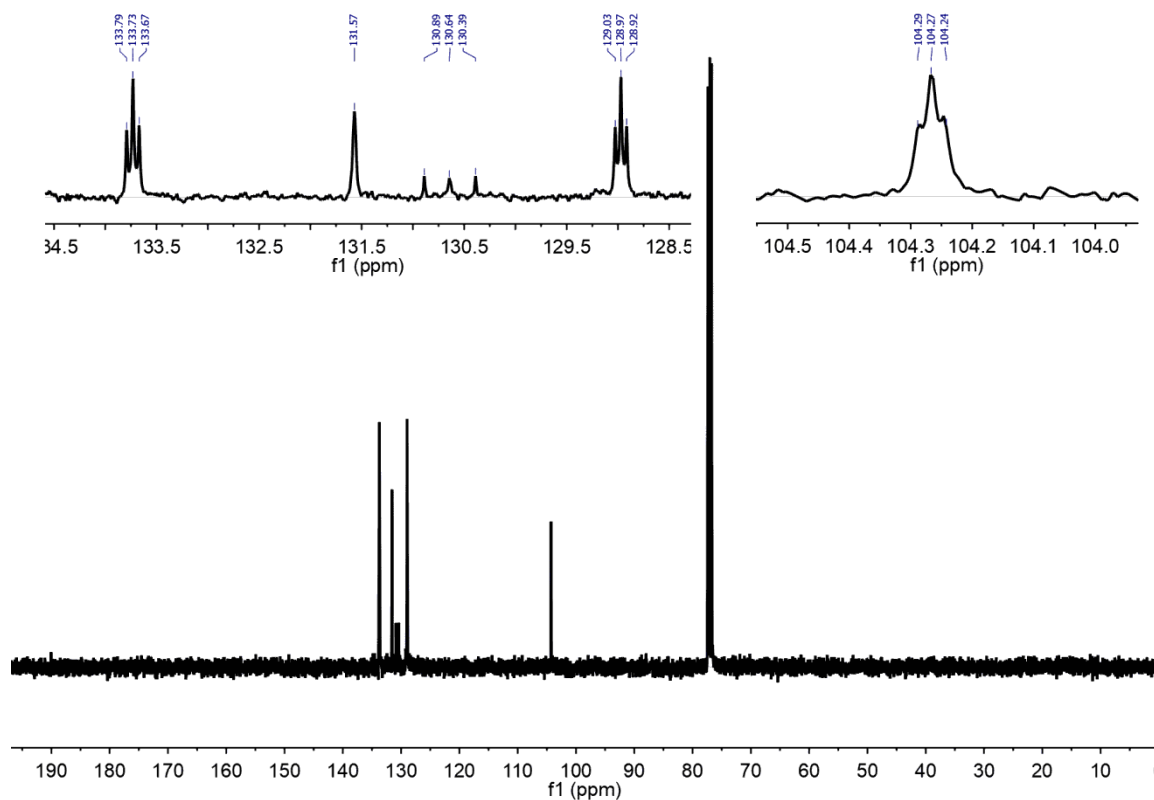

Figure S.7 –  $^{13}\text{C}\{^1\text{H}\}$  NMR (101 MHz,  $\text{CDCl}_3$ ,  $25^\circ\text{C}$ ) spectrum of **1**

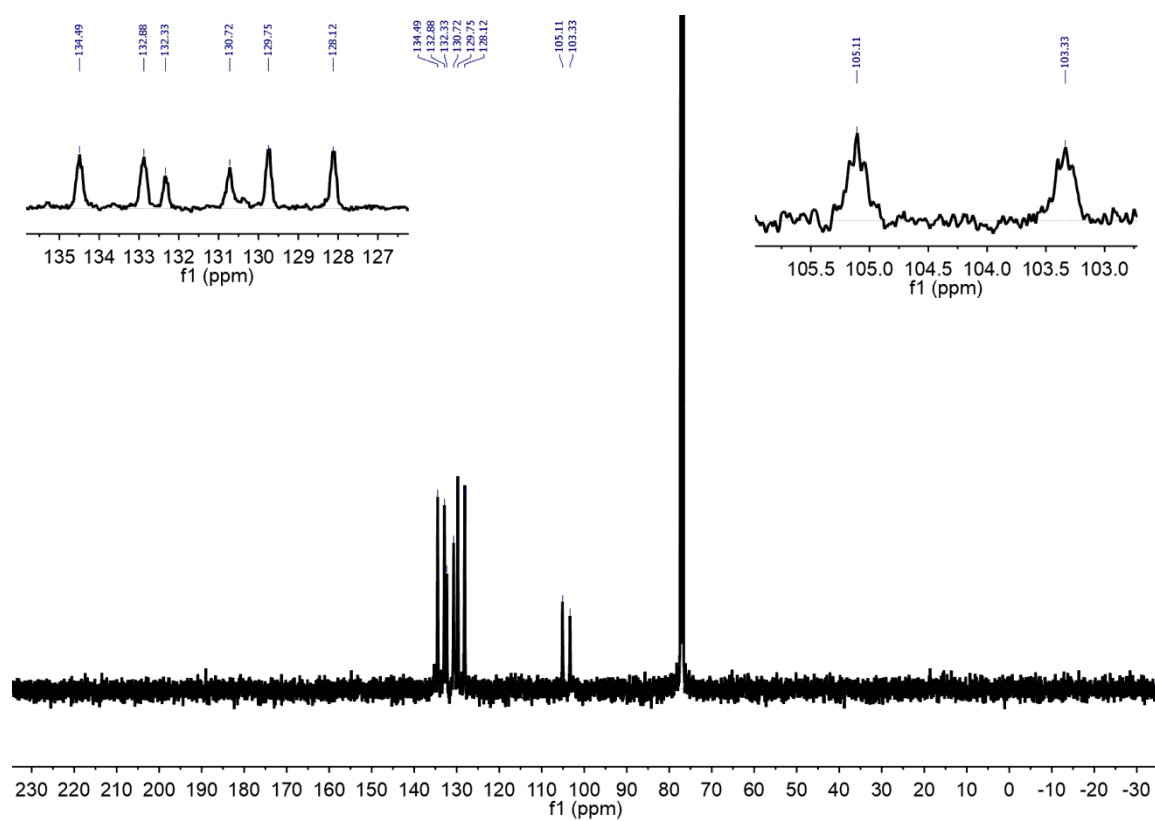

Figure S.8 –  $^{13}\text{C}\{^1\text{H}, \text{gated decoupling mode}\}$  NMR (101 MHz,  $\text{CDCl}_3$ ,  $25^\circ\text{C}$ ) spectrum of **1**

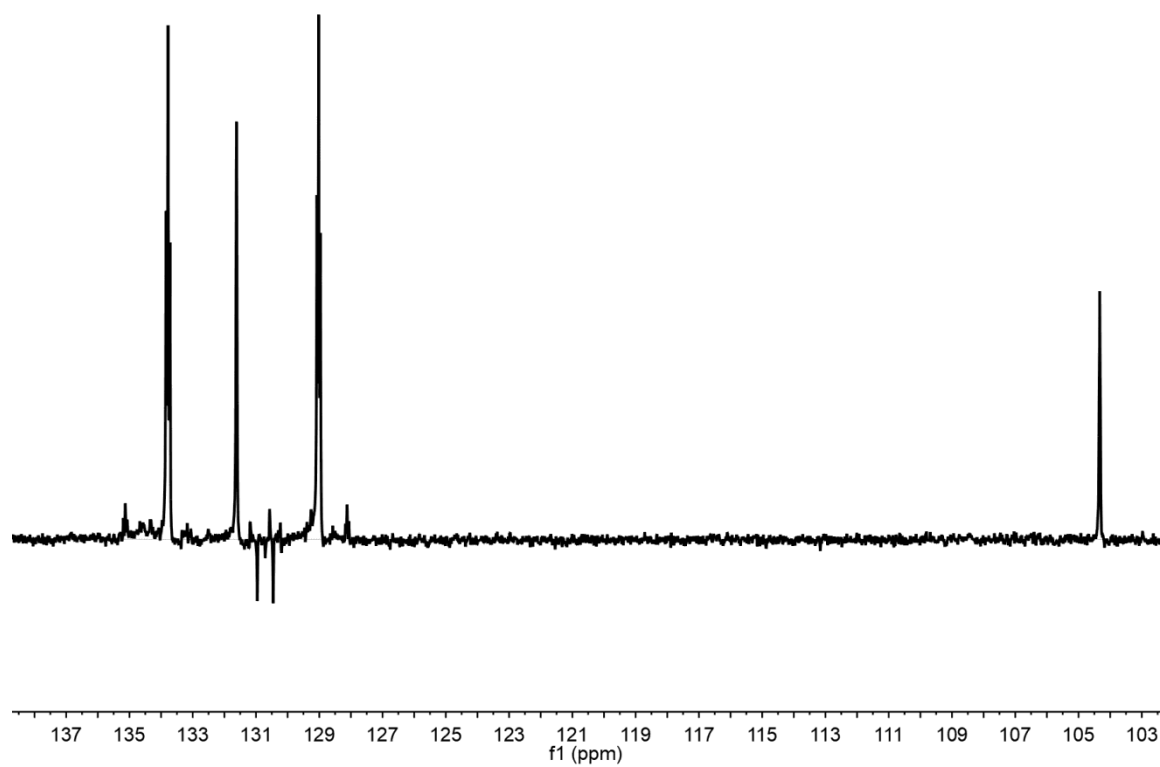

Figure S.9 – J-modulated  $^{13}\text{C}$  NMR (101 MHz,  $\text{CDCl}_3$ ,  $25^\circ\text{C}$ ) spectrum of **1**

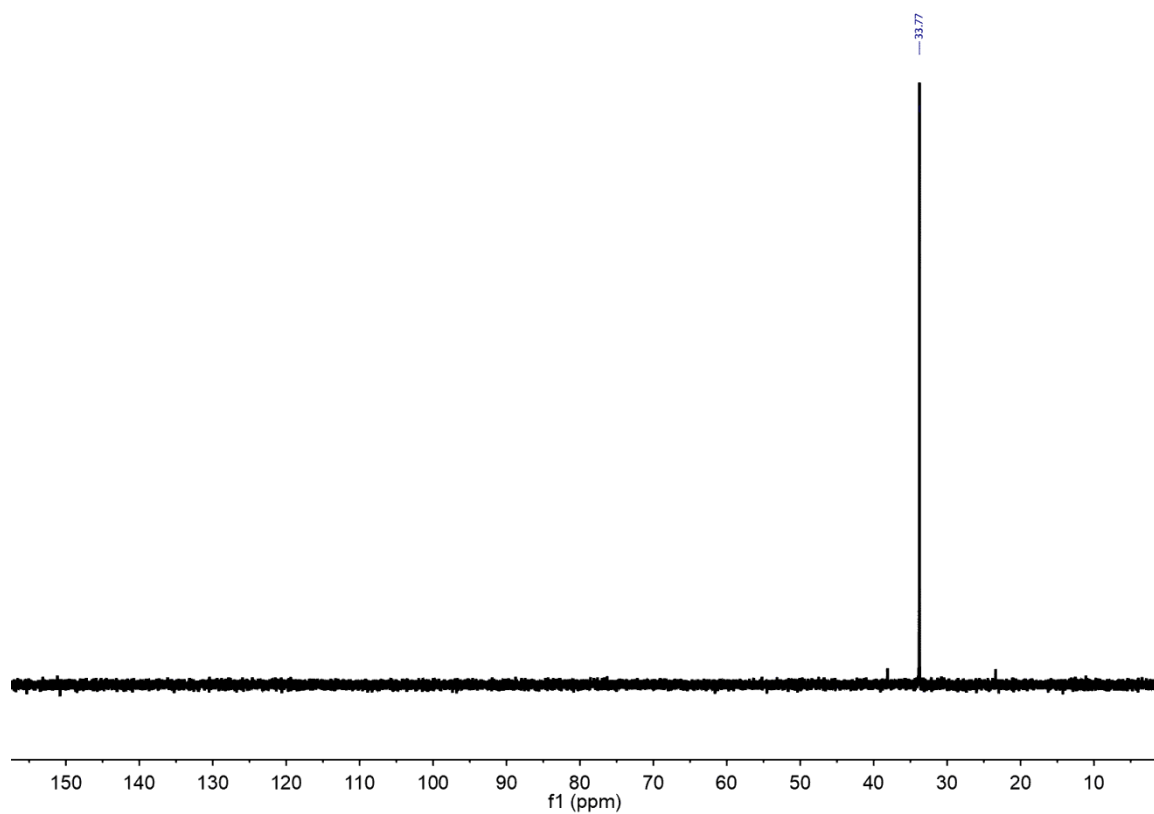

Figure S.10 –  $^{31}\text{P}\{^1\text{H}\}$  NMR (162 MHz,  $\text{CDCl}_3$ , 25°C) spectrum of **1**

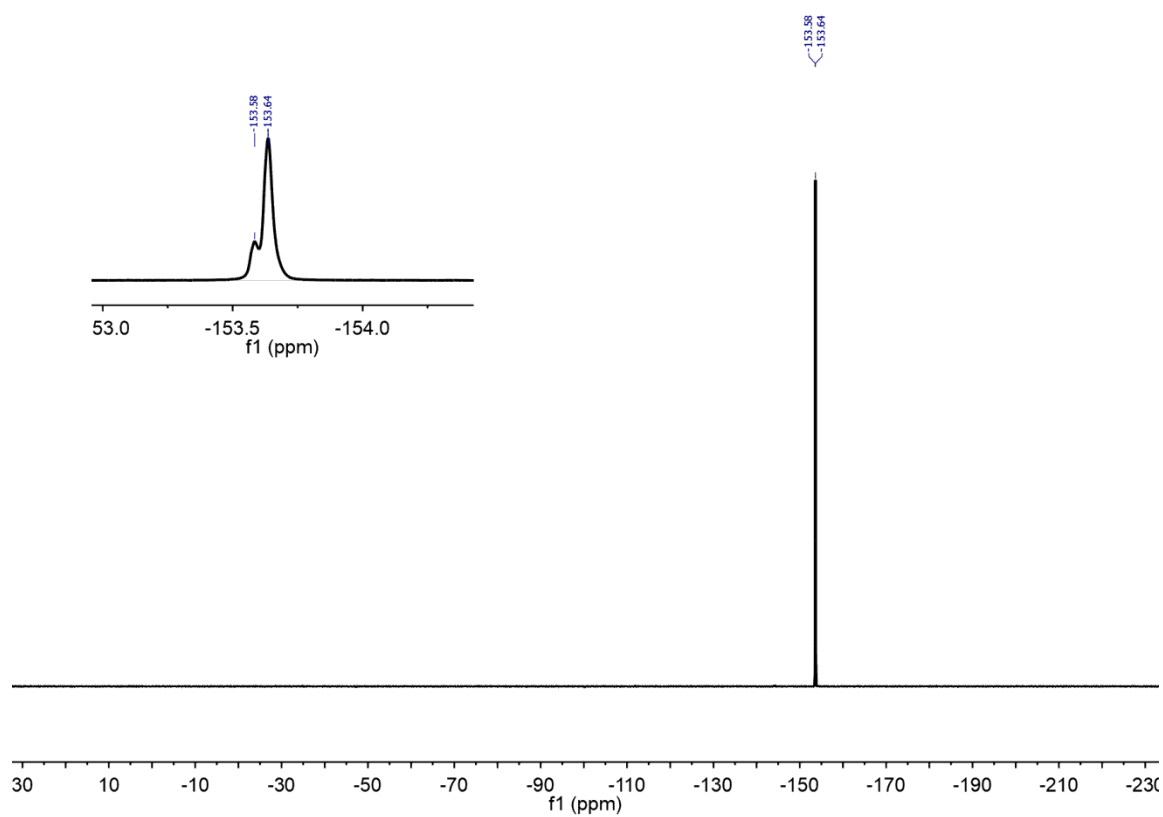

Figure S.11 –  $^{19}\text{F}$  NMR (376 MHz,  $\text{CDCl}_3$ , 25°C) spectrum of **1**

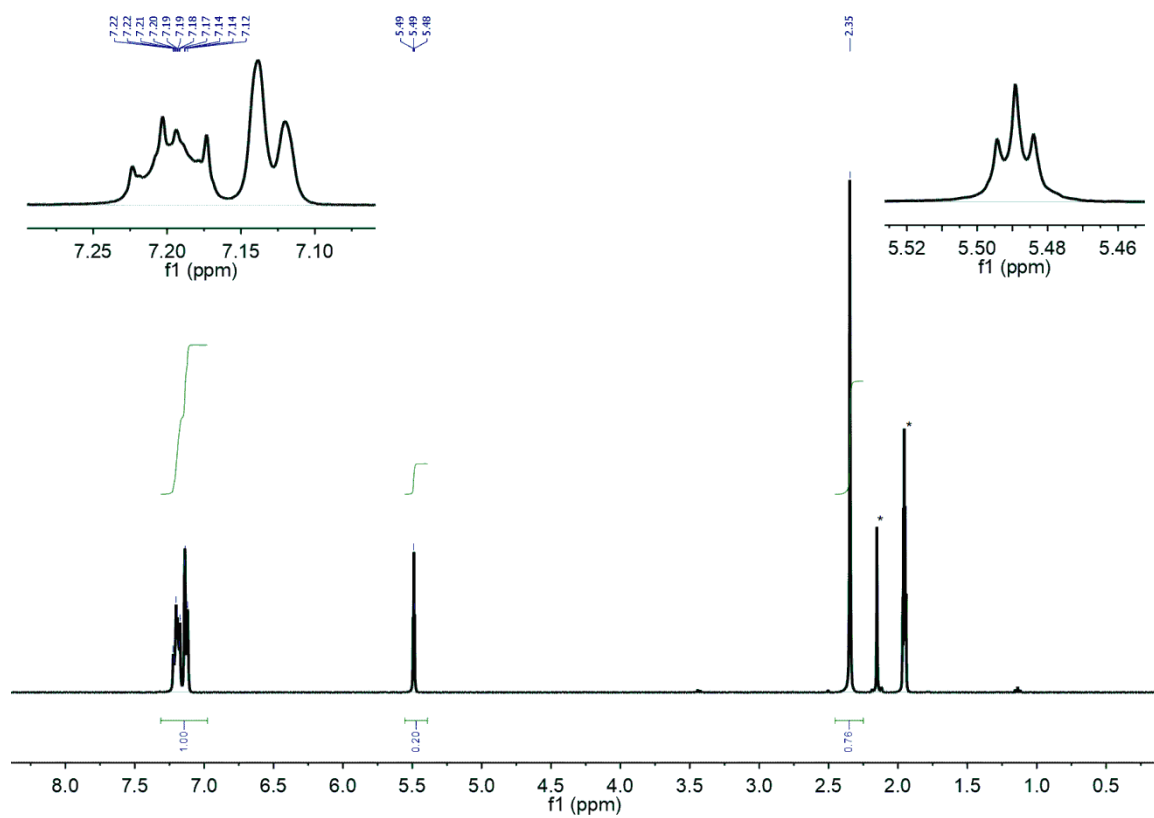

Figure S.12 –  $^1\text{H}$  NMR (400 MHz,  $\text{CD}_3\text{CN}$ ,  $25^\circ\text{C}$ ) spectrum of **2**

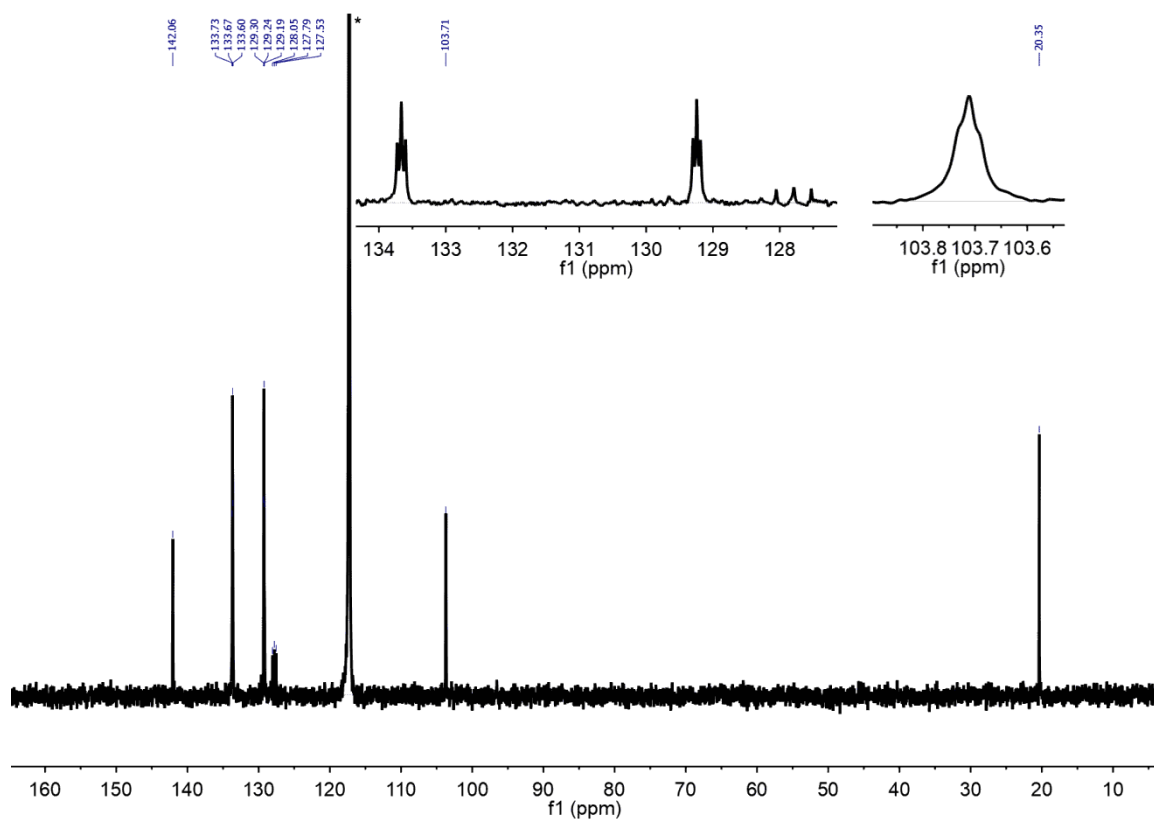

Figure S.13 –  $^{13}\text{C}\{^1\text{H}\}$  NMR (101 MHz,  $\text{CD}_3\text{CN}$ ,  $25^\circ\text{C}$ ) spectrum of **2**



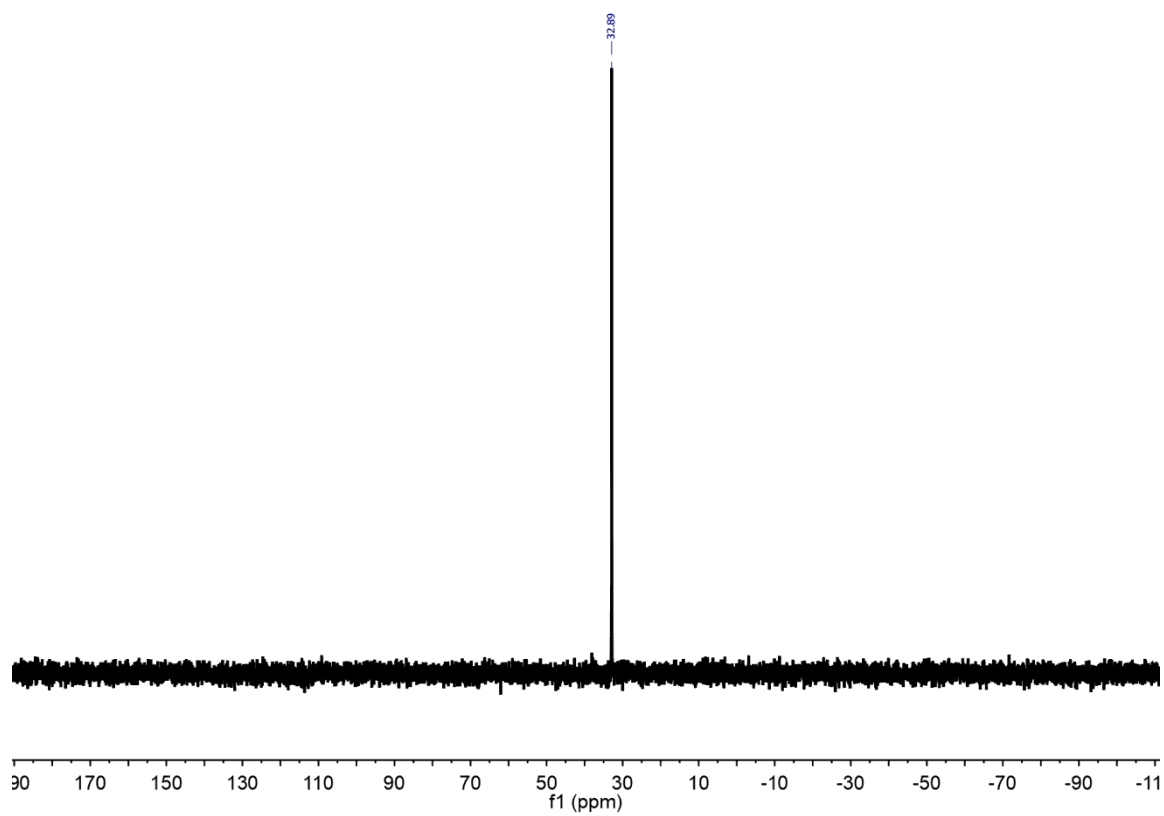

Figure S.14 –  $^{31}\text{P}\{^1\text{H}\}$  NMR (162 MHz,  $\text{CD}_3\text{CN}$ ,  $25^\circ\text{C}$ ) spectrum of **2**

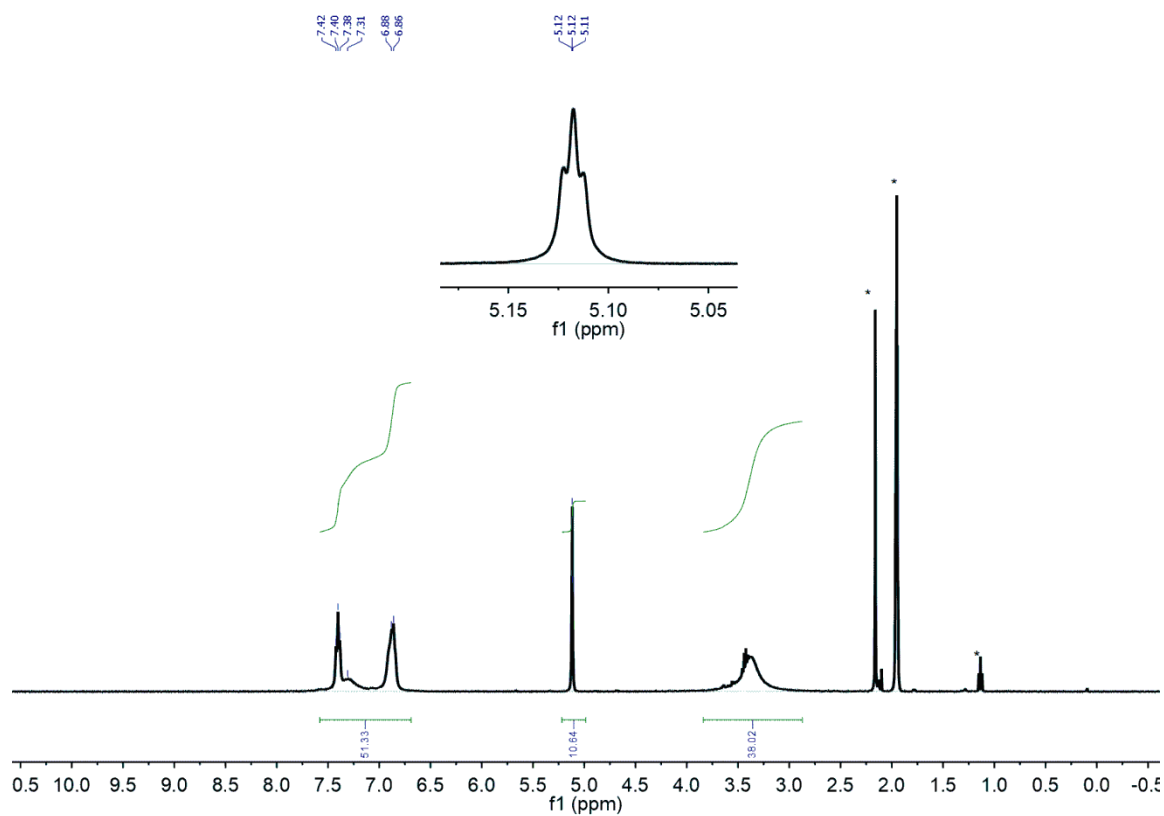

Figure S.15 –  $^1\text{H}$  NMR (400 MHz,  $\text{CD}_3\text{CN}$ ,  $25^\circ\text{C}$ ) spectrum of **3**

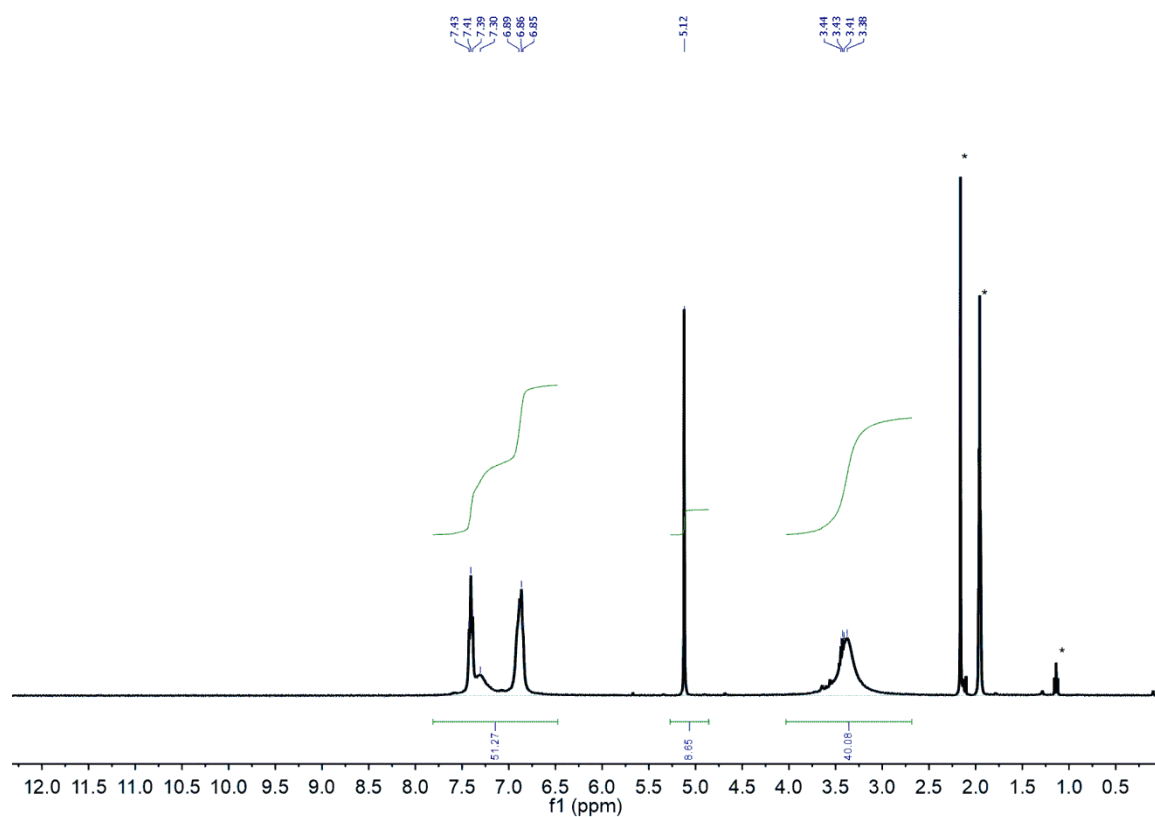

Figure S.16 –  $^1\text{H}\{^{31}\text{P}\}$  NMR (400 MHz,  $\text{CD}_3\text{CN}$ ,  $25^\circ\text{C}$ ) spectrum of **3**

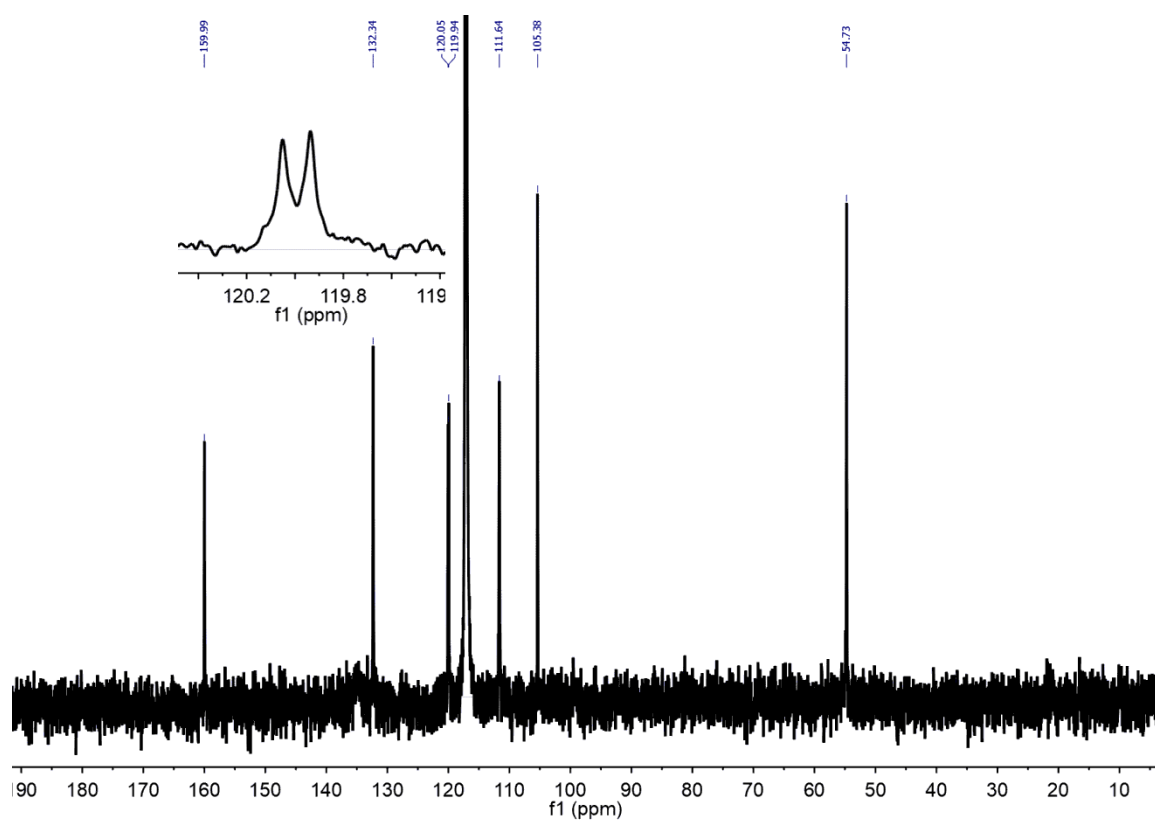

Figure S.17 –  $^{13}\text{C}\{^1\text{H}\}$  NMR (101 MHz,  $\text{CD}_3\text{CN}$ ,  $25^\circ\text{C}$ ) spectrum of **3**

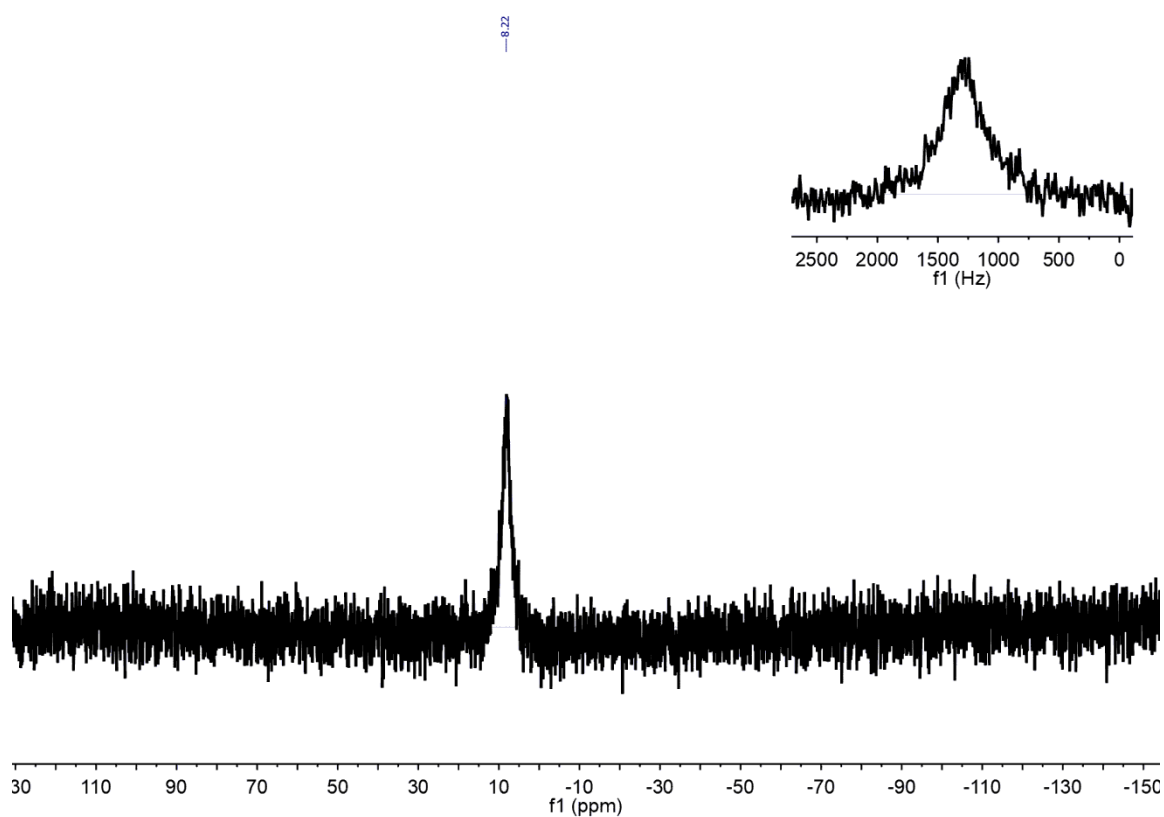

Figure S.18 –  $^{31}\text{P}\{^1\text{H}\}$  NMR (162 MHz,  $\text{CD}_3\text{CN}$ ,  $25^\circ\text{C}$ ) spectrum of **3**

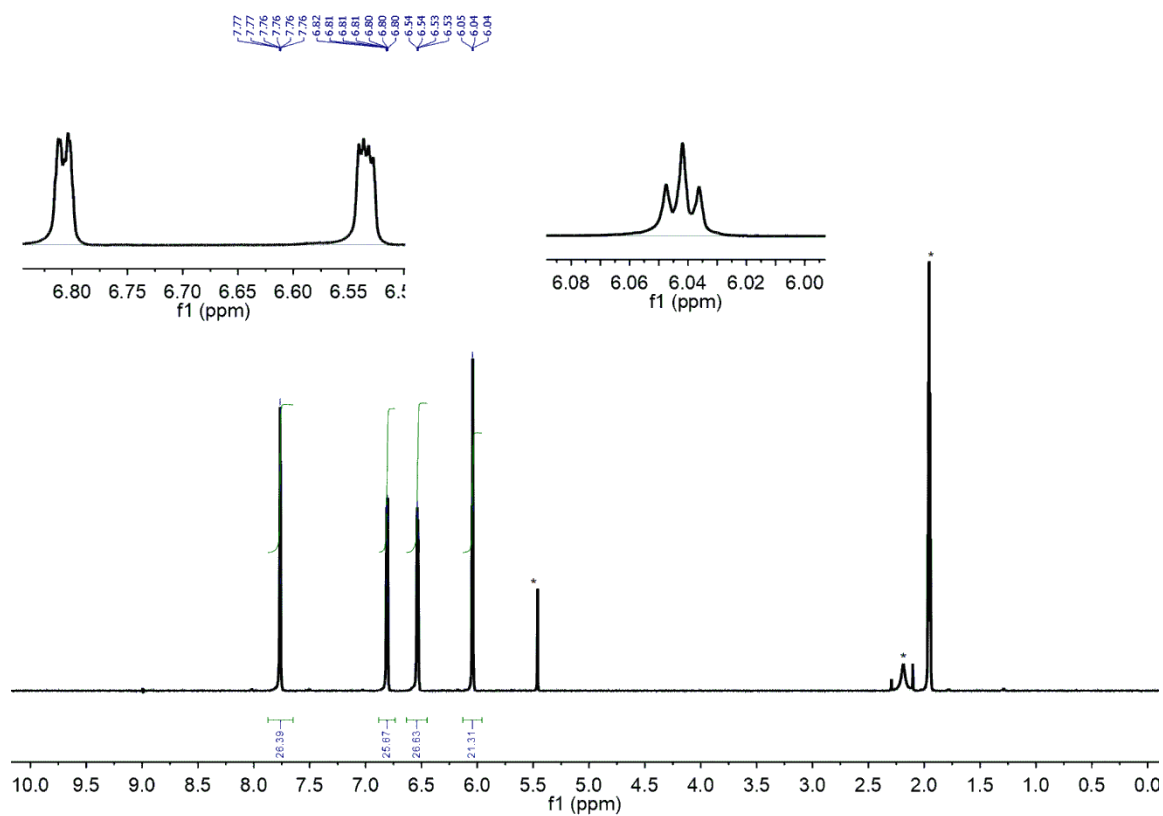

Figure S.19 –  $^1\text{H}$  NMR (400 MHz,  $\text{CD}_3\text{CN}$ ,  $25^\circ\text{C}$ ) spectrum of **4**

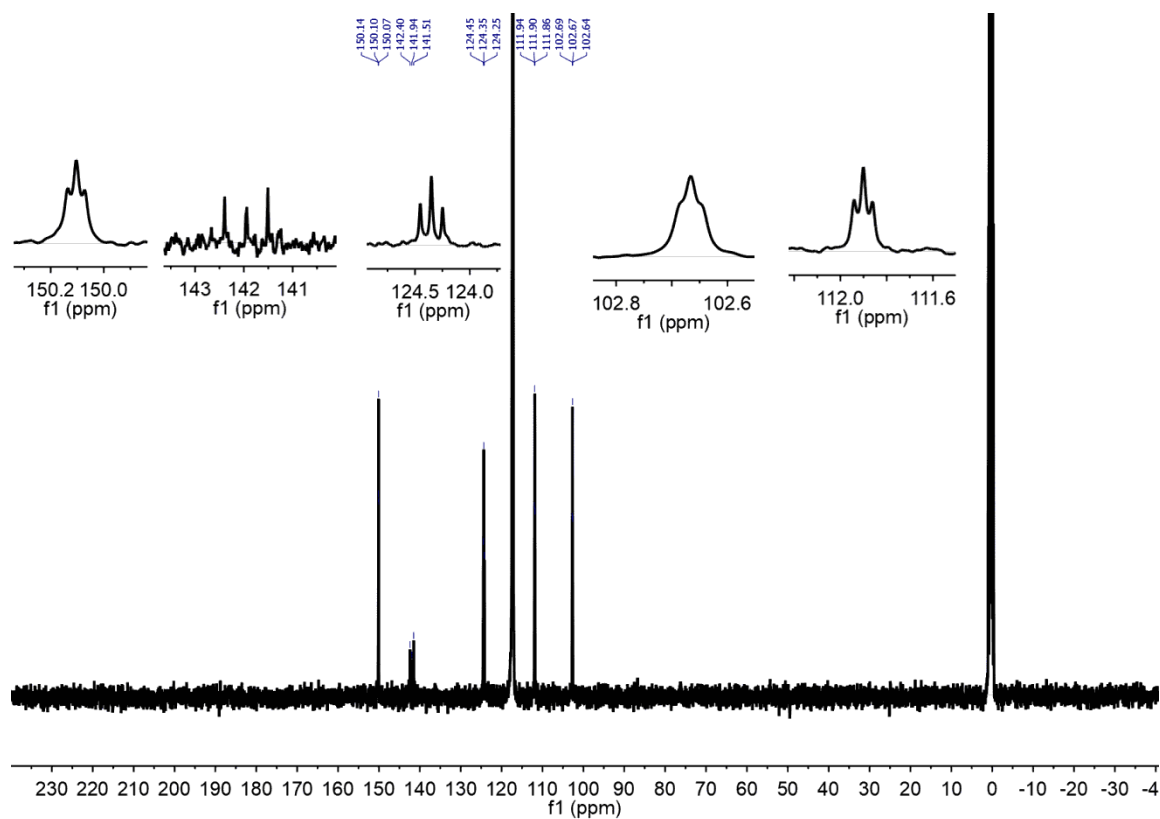

Figure S.20 –  $^{13}\text{C}\{^1\text{H}\}$  NMR (101 MHz,  $\text{CD}_3\text{CN}$ ,  $25^\circ\text{C}$ ) spectrum of **4**

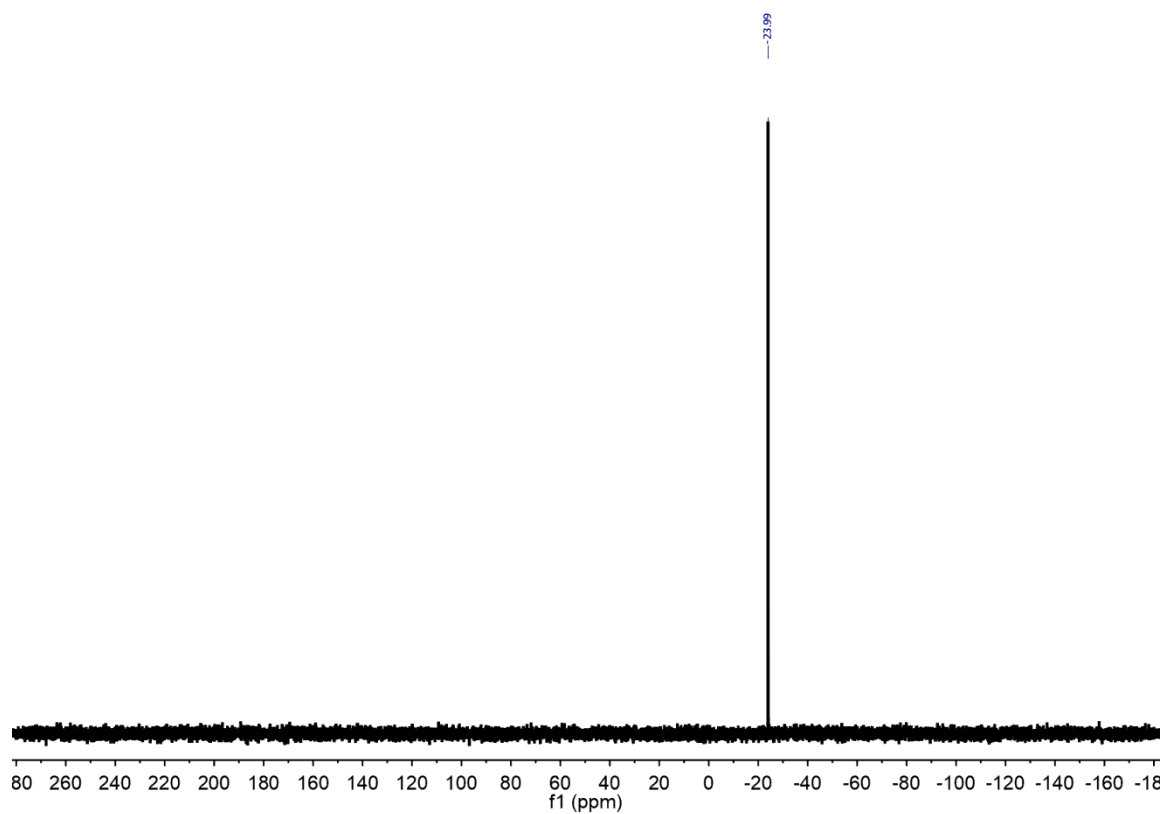

Figure S.21 –  $^{31}\text{P}\{^1\text{H}\}$  NMR (162 MHz,  $\text{CD}_3\text{CN}$ ,  $25^\circ\text{C}$ ) spectrum of **4**

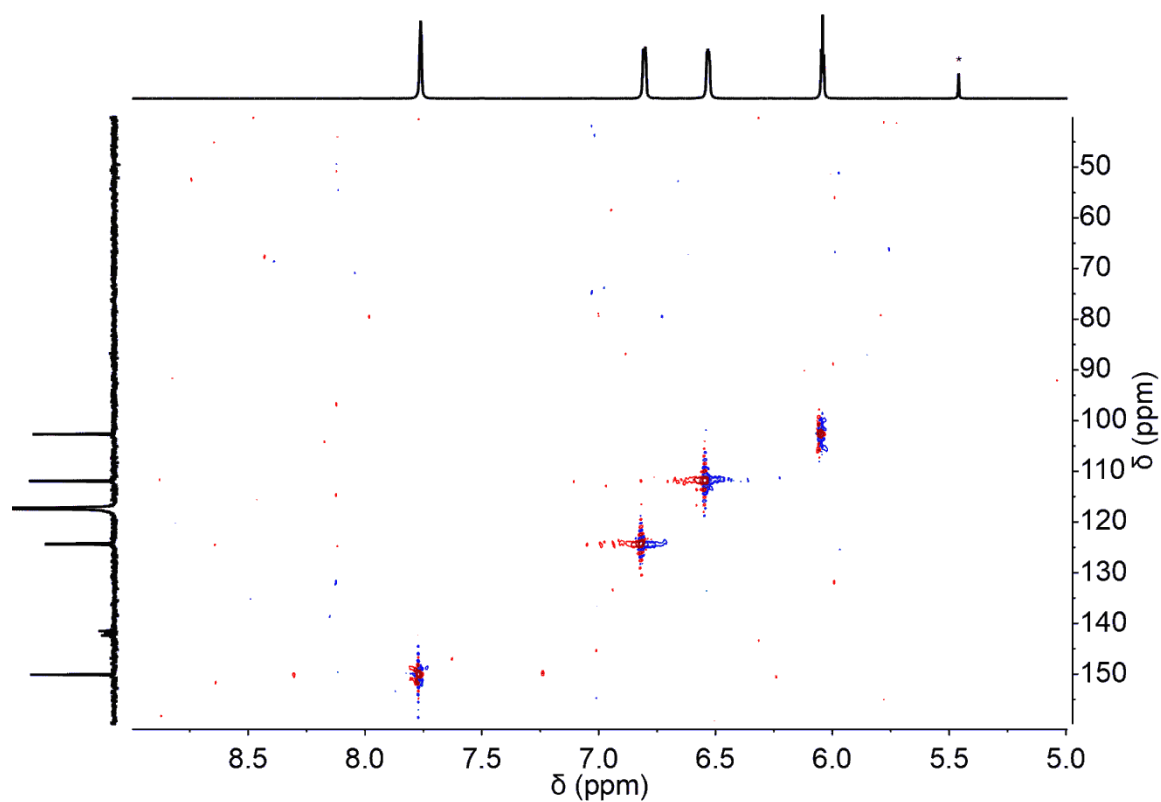

Figure S.22 –  $^1\text{H}$ - $^{13}\text{C}$  HSQC NMR (400 MHz,  $\text{CD}_3\text{CN}$ ,  $25^\circ\text{C}$ ) spectrum of **4**

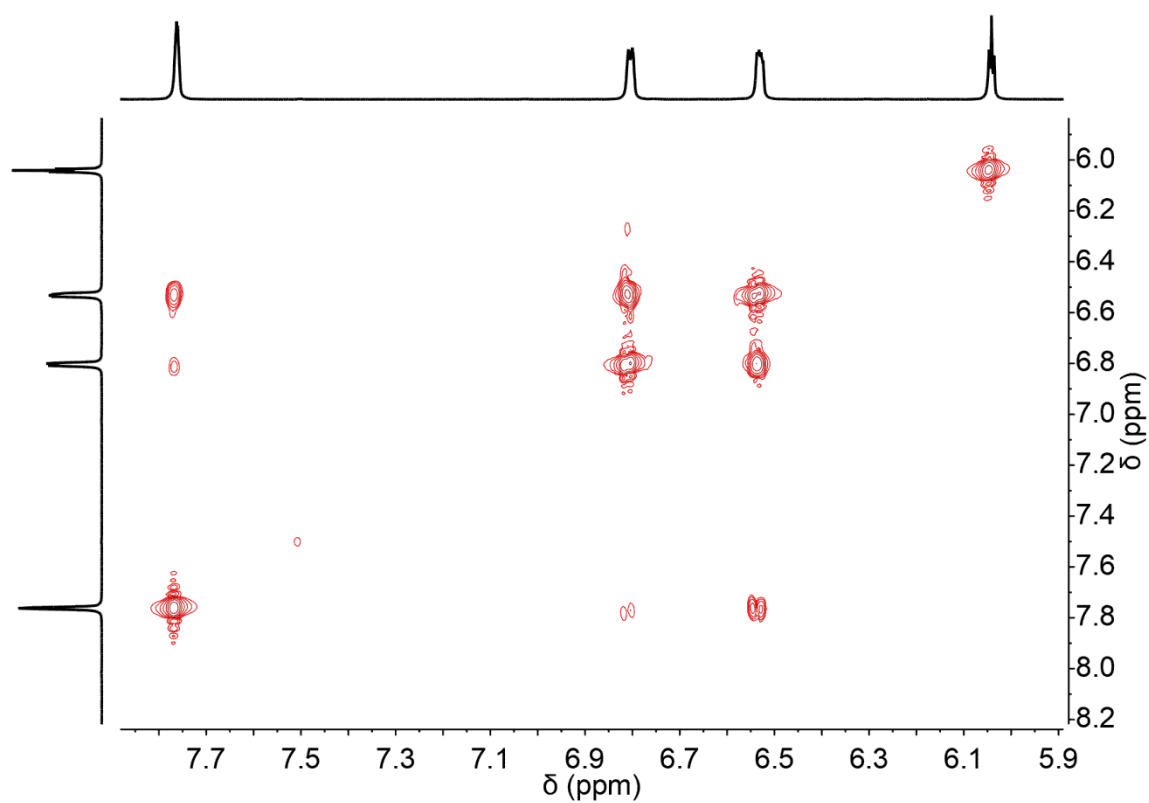

Figure S.23 –  $^1\text{H}$ – $^1\text{H}$  COSY NMR (400 MHz,  $\text{CD}_3\text{CN}$ ,  $25^\circ\text{C}$ ) spectrum of **4**

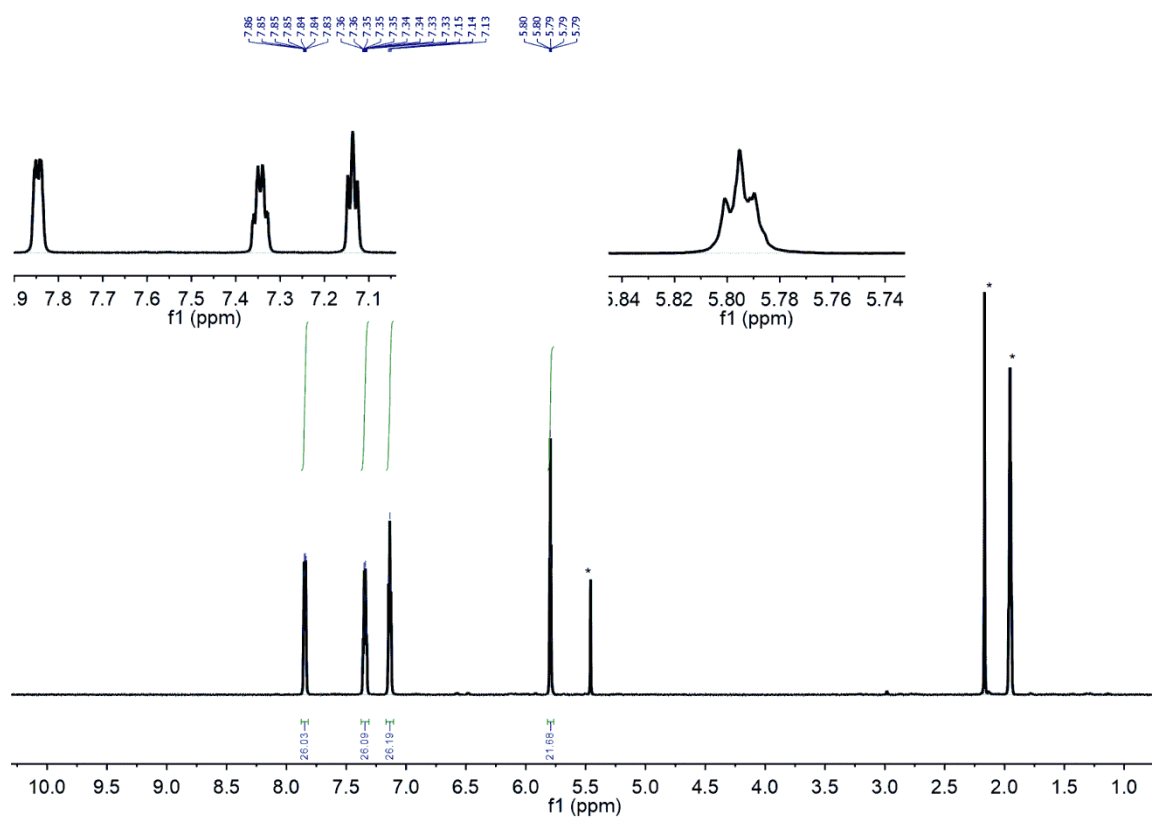

Figure S.24 –  $^1\text{H}$  NMR (400 MHz,  $\text{CD}_3\text{CN}$ ,  $25^\circ\text{C}$ ) spectrum of **5**

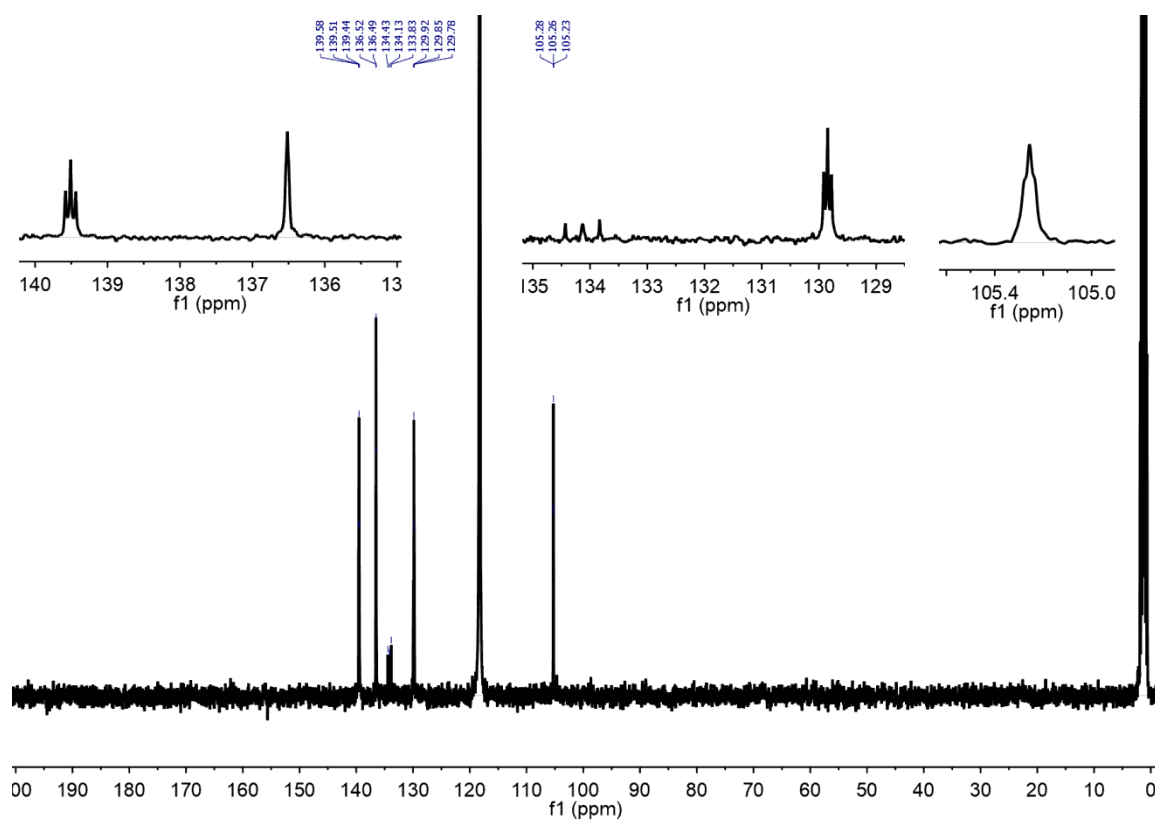

Figure S.25 –  $^{13}\text{C}\{^1\text{H}\}$  NMR (101 MHz,  $\text{CD}_3\text{CN}$ ,  $25^\circ\text{C}$ ) spectrum of **5**

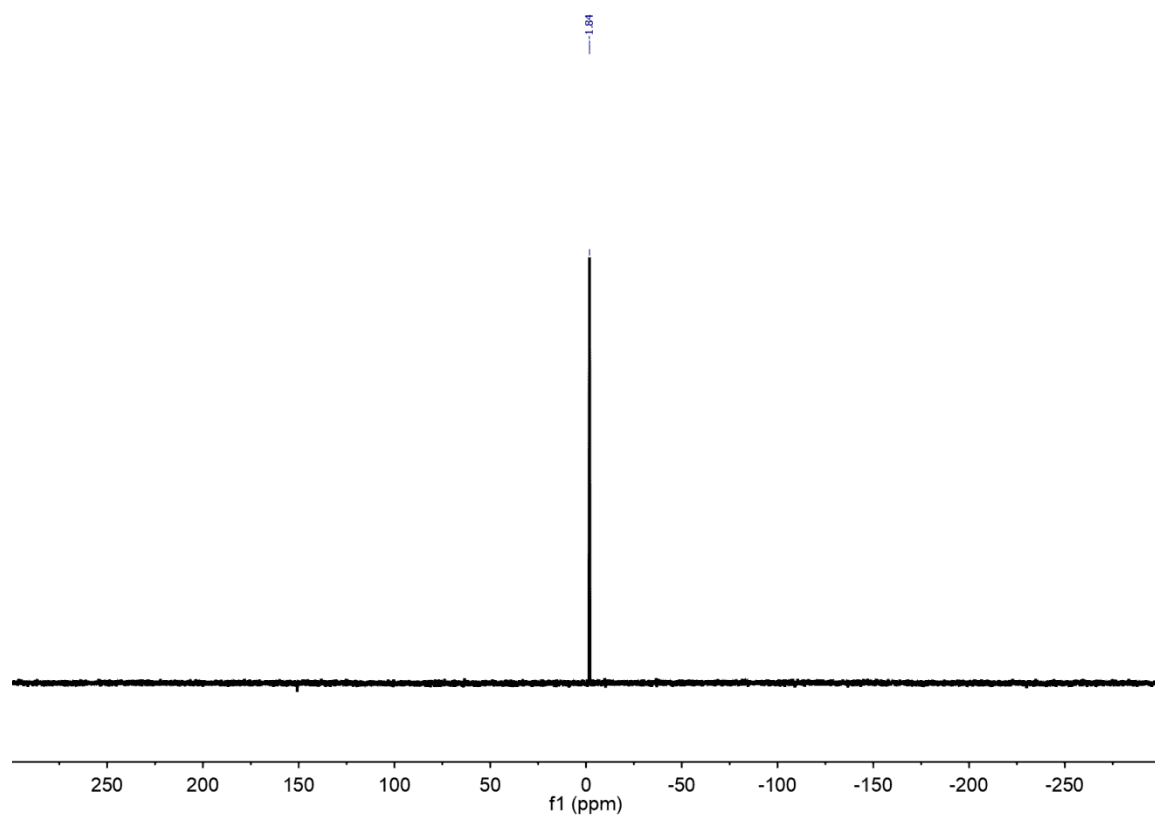

Figure S.26 –  $^{31}\text{P}\{^1\text{H}\}$  NMR (162 MHz,  $\text{CD}_3\text{CN}$ ,  $25^\circ\text{C}$ ) spectrum of **5**

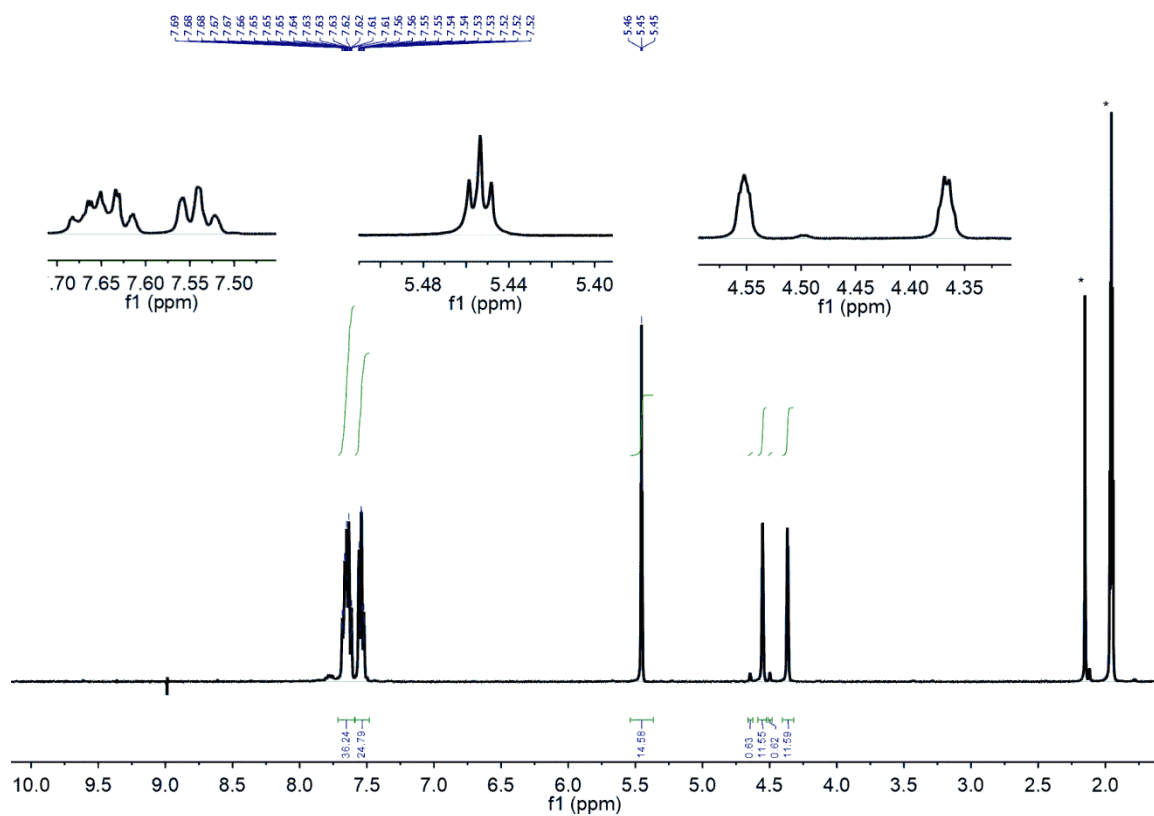

Figure S.27 – <sup>1</sup>H NMR (400 MHz, CD<sub>3</sub>CN, 25°C) spectrum of **6**

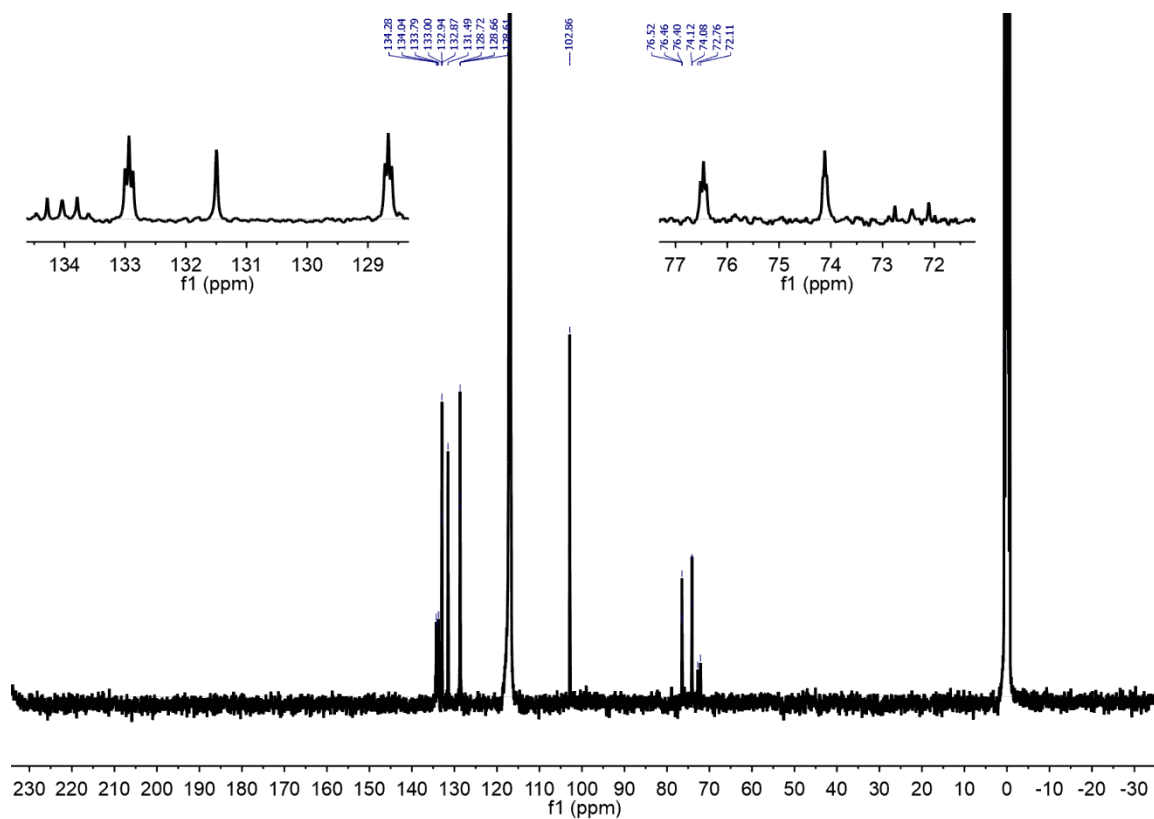

Figure S.28 – <sup>13</sup>C{<sup>1</sup>H} NMR (101 MHz, CD<sub>3</sub>CN, 25°C) spectrum of **6**



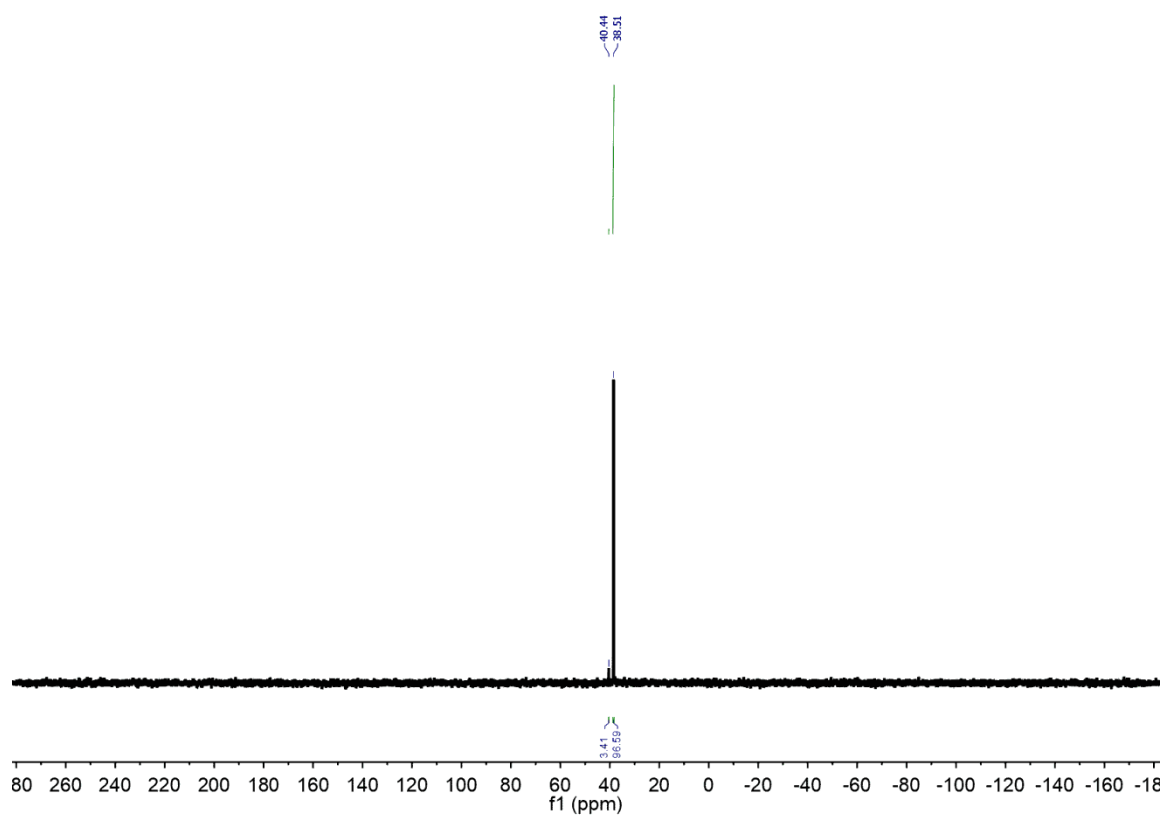

Figure S.29 –  $^{31}\text{P}\{^1\text{H}\}$  NMR (162 MHz,  $\text{CD}_3\text{CN}$ , 25°C) spectrum of **6**

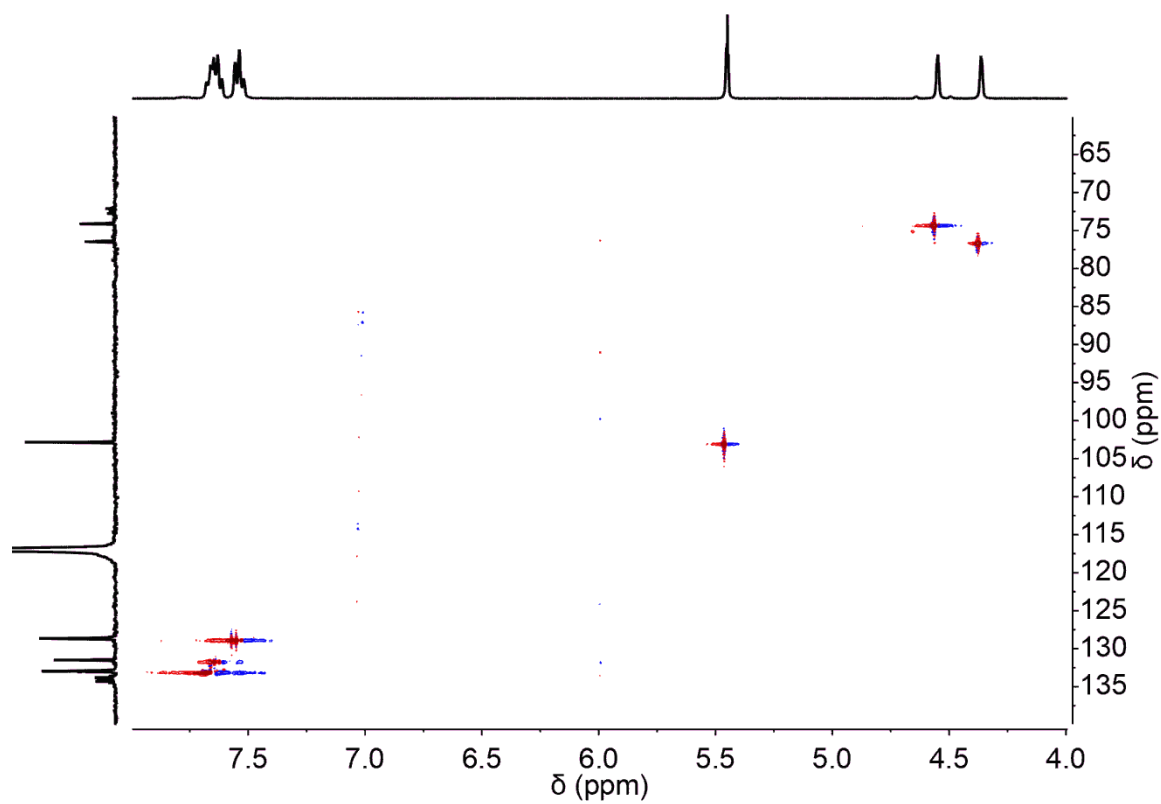

Figure S.30 –  $^1\text{H}$ - $^{13}\text{C}$  HSQC NMR (400 MHz,  $\text{CD}_3\text{CN}$ , 25°C) spectrum of **6**

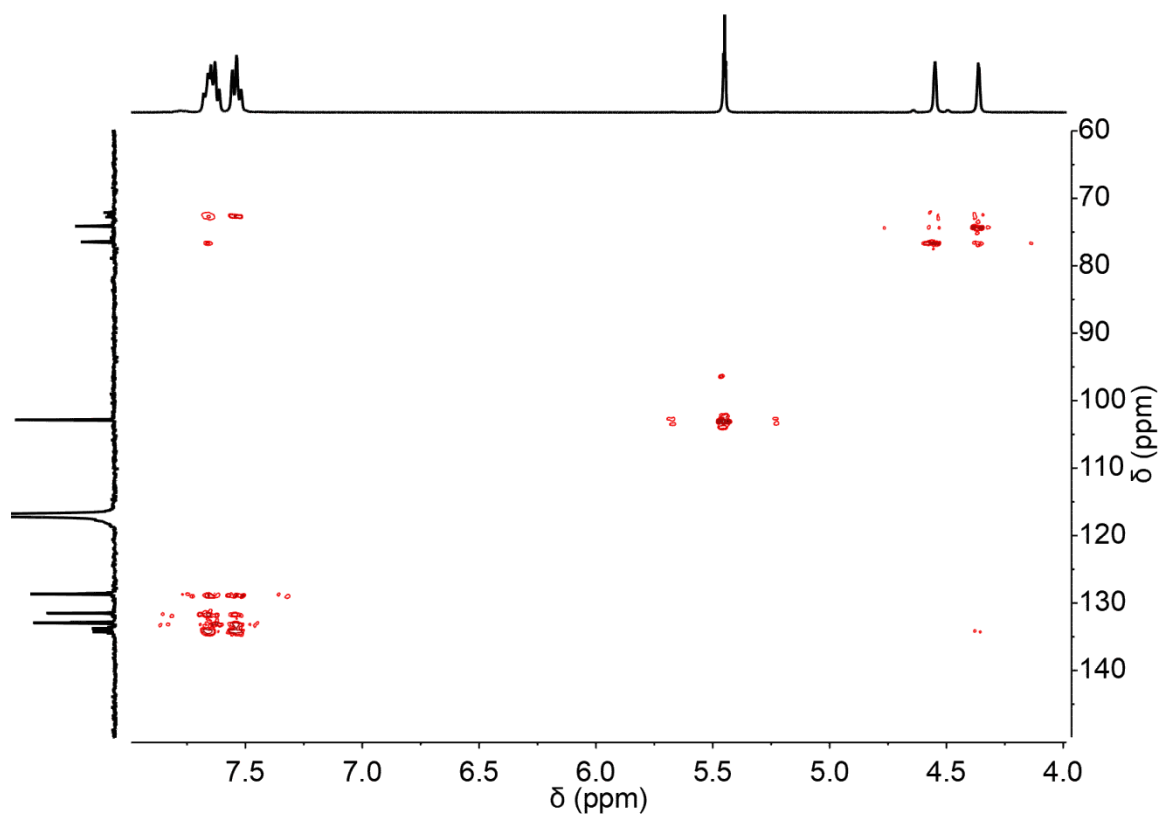

Figure S.31 –  $^1\text{H}$ - $^{13}\text{C}$  HMBC NMR (400 MHz,  $\text{CD}_3\text{CN}$ ,  $25^\circ\text{C}$ ) spectrum of **6**

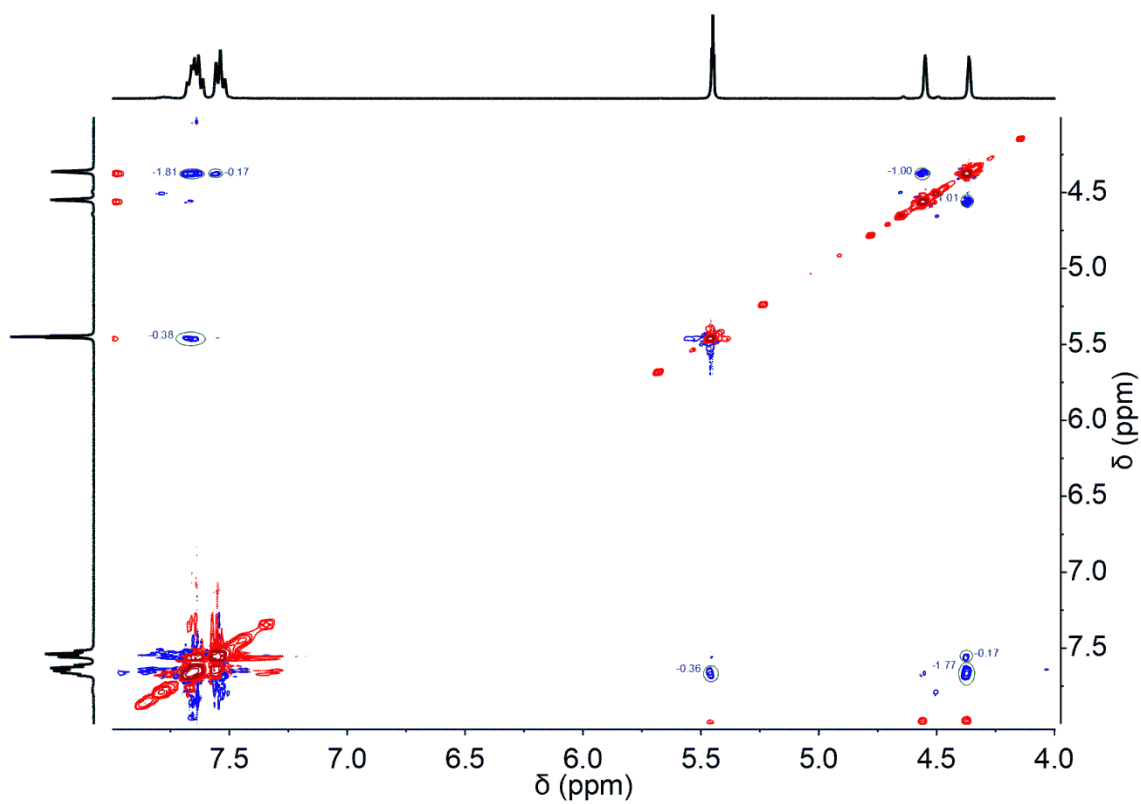

Figure S.32 –  $^1\text{H}$ - $^1\text{H}$  NOESY NMR (400 MHz,  $\text{CD}_3\text{CN}$ ,  $25^\circ\text{C}$ ) spectrum of **6**

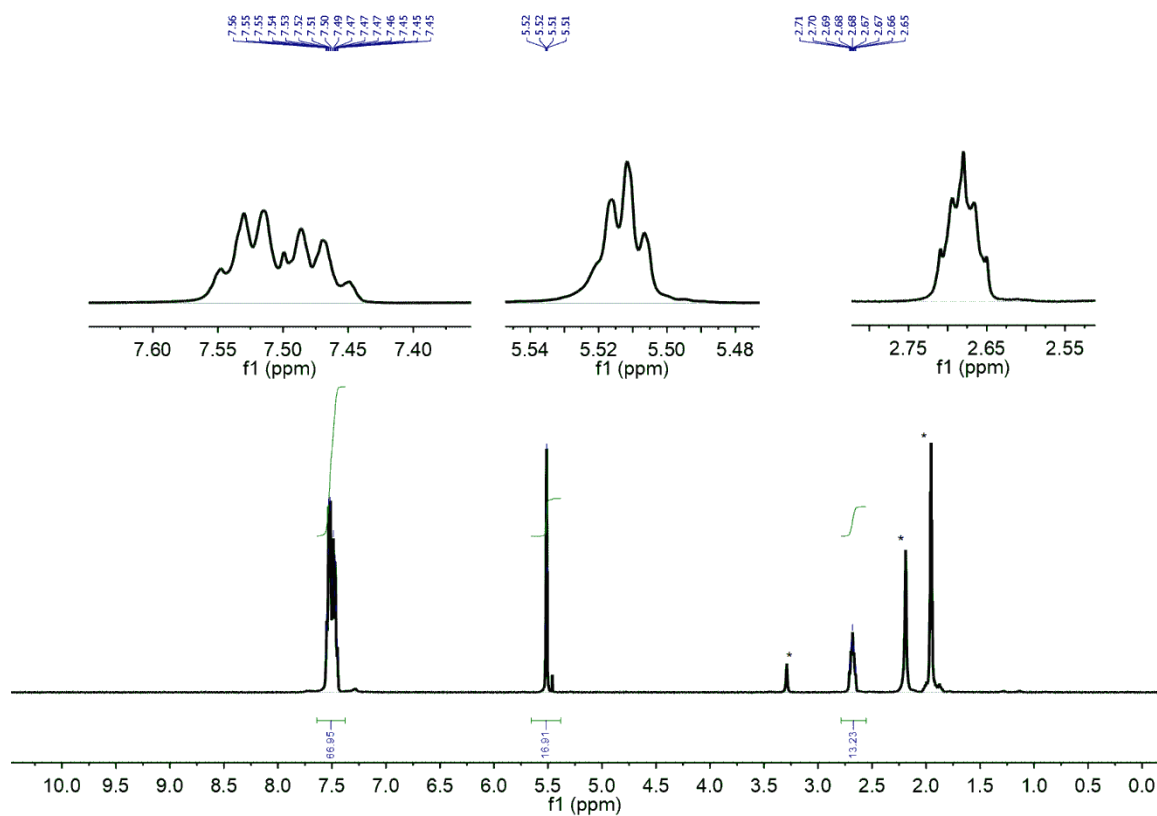

Figure S.33 –  $^1\text{H}$  NMR (400 MHz,  $\text{CD}_3\text{CN}$ ,  $25^\circ\text{C}$ ) spectrum of **7**

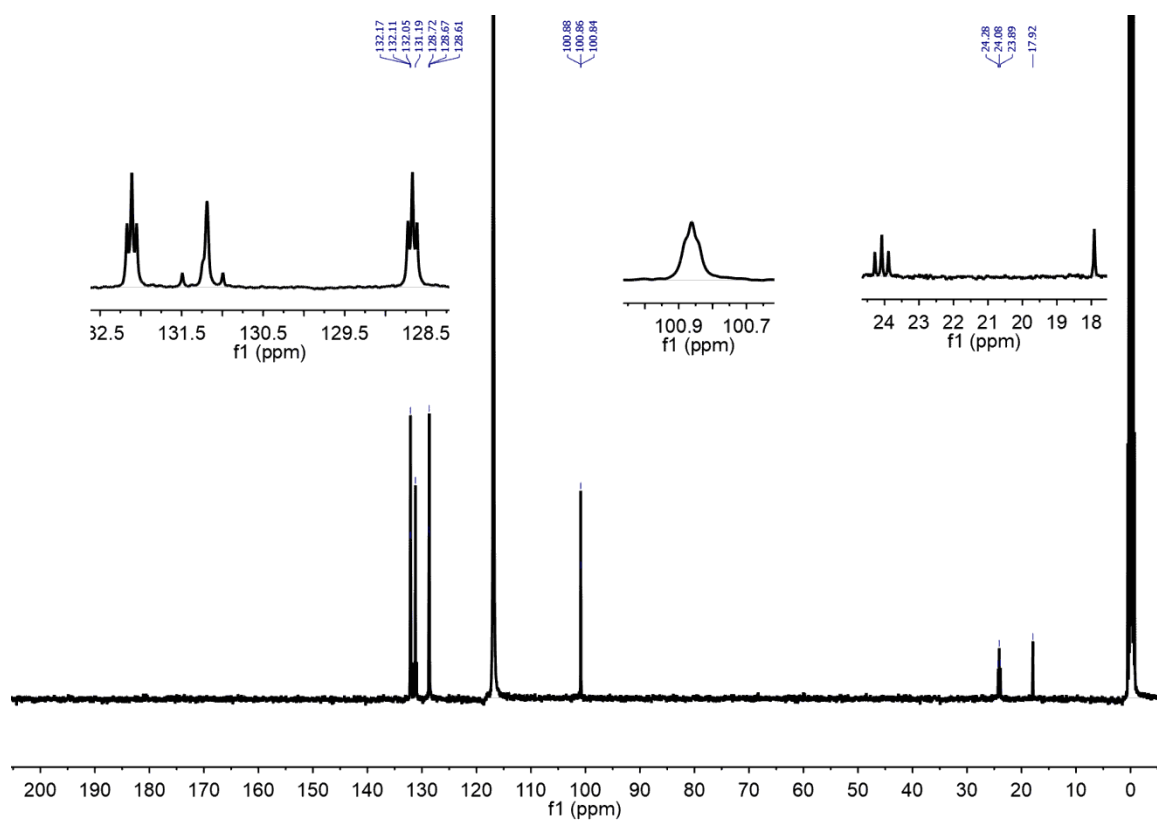

Figure S.34 –  $^{13}\text{C}\{^1\text{H}\}$  NMR (101 MHz,  $\text{CD}_3\text{CN}$ ,  $25^\circ\text{C}$ ) spectrum of **7**

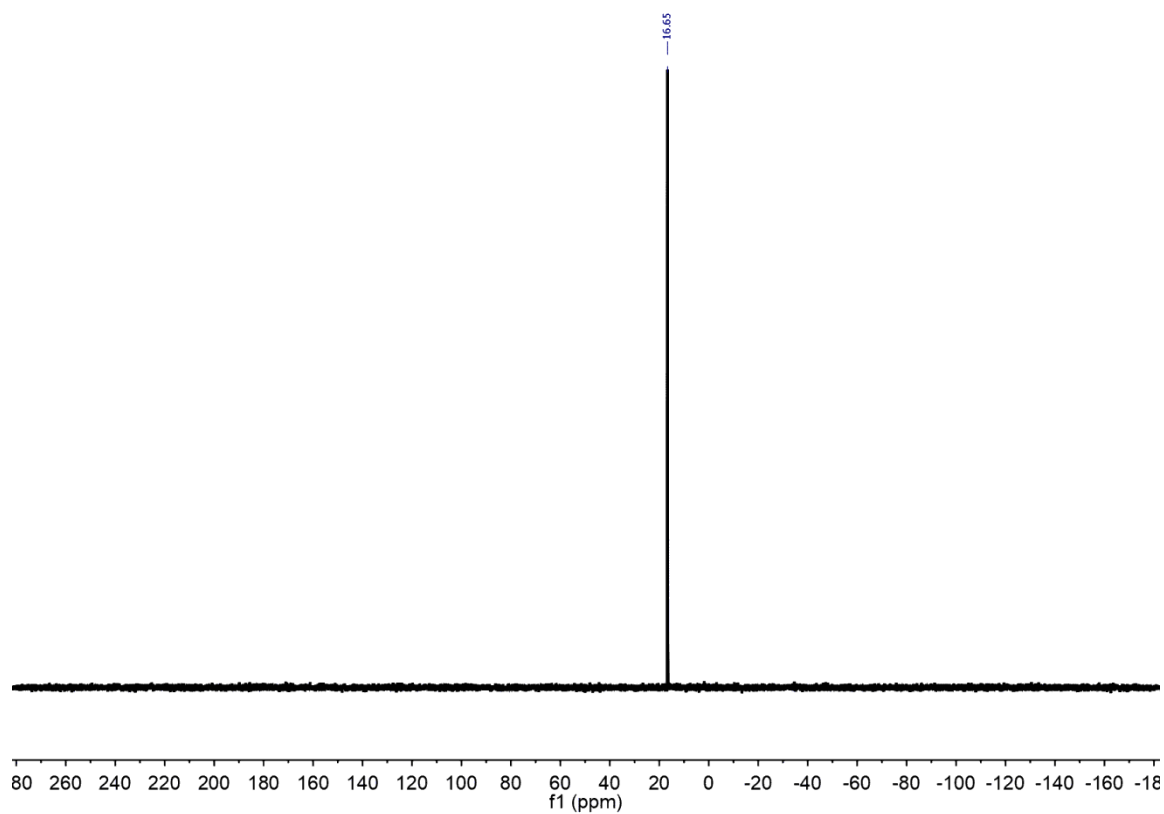

Figure S.35 –  $^{31}\text{P}\{^1\text{H}\}$  NMR (162 MHz,  $\text{CD}_3\text{CN}$ , 25°C) spectrum of **7**

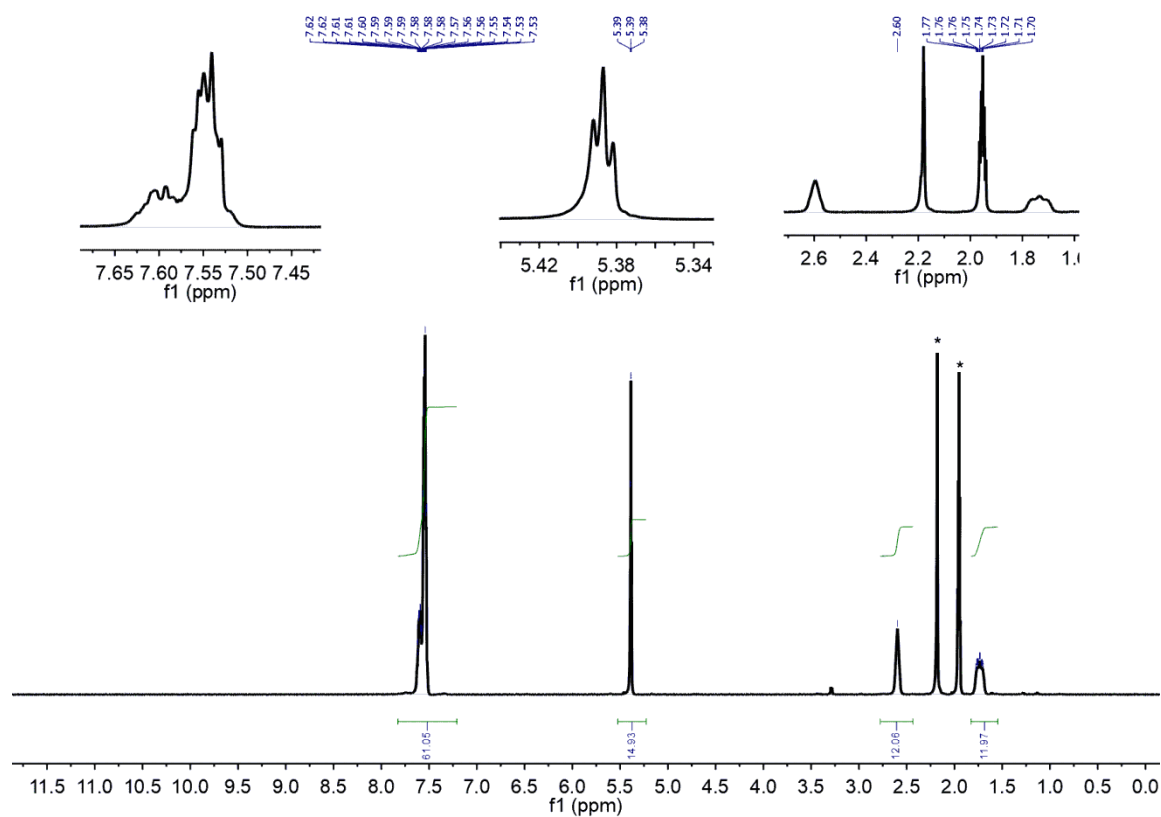

Figure S.36 –  $^1\text{H}$  NMR (400 MHz,  $\text{CD}_3\text{CN}$ , 25°C) spectrum of **8**

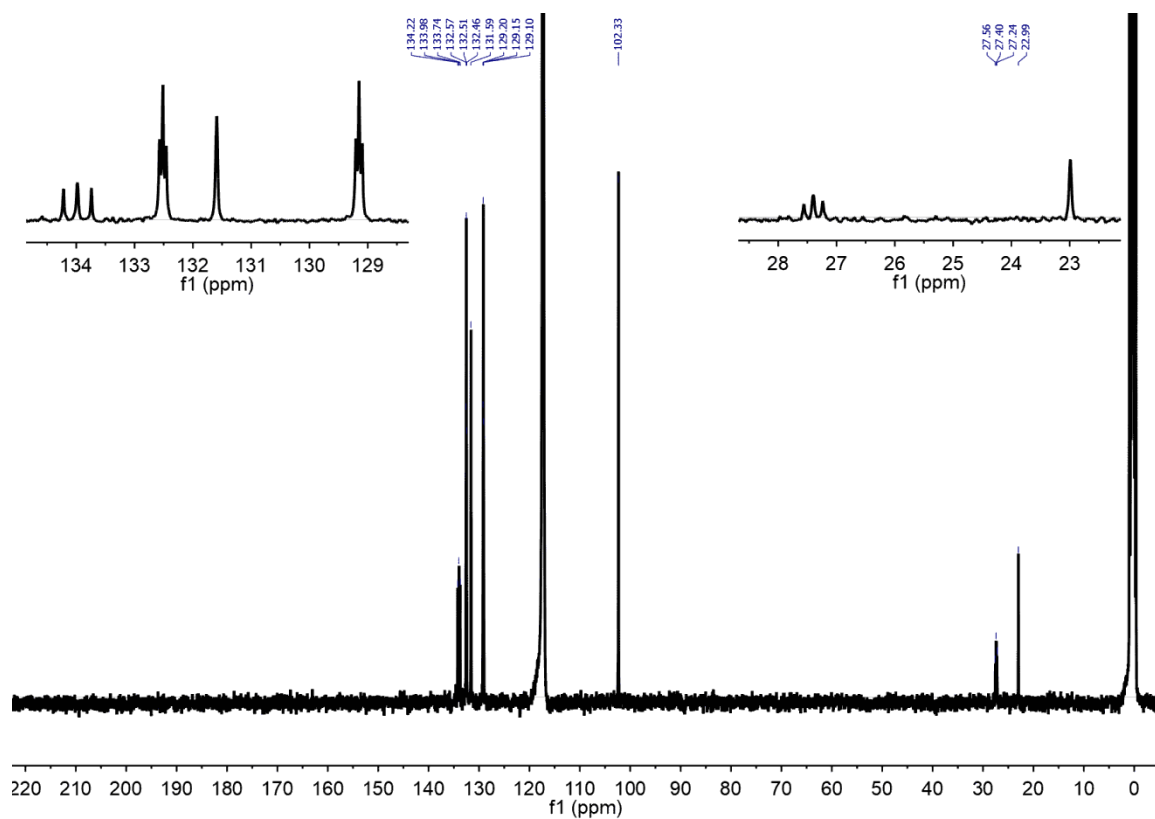

Figure S.37 –  $^{13}\text{C}\{^1\text{H}\}$  NMR (101 MHz,  $\text{CD}_3\text{CN}$ , 25°C) spectrum of **8**

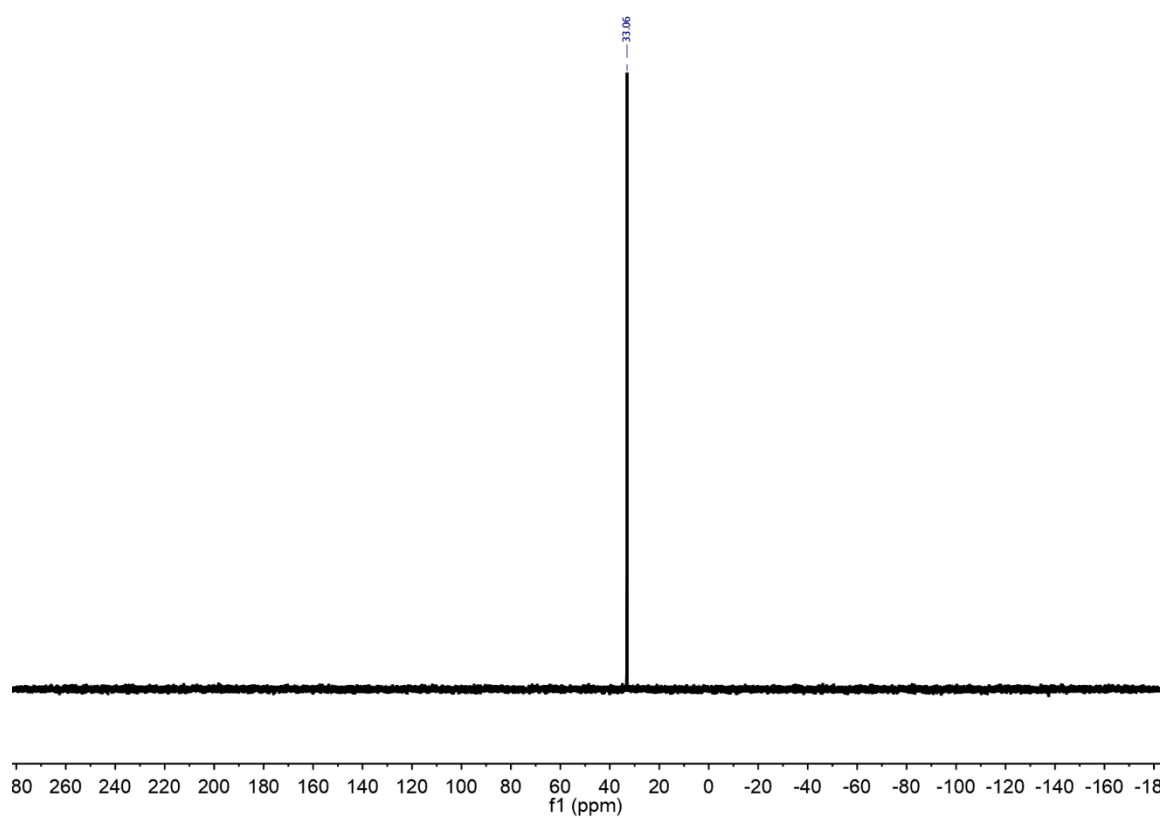

Figure S.38 –  $^{31}\text{P}\{^1\text{H}\}$  NMR (162 MHz,  $\text{CD}_3\text{CN}$ , 25°C) spectrum of **8**

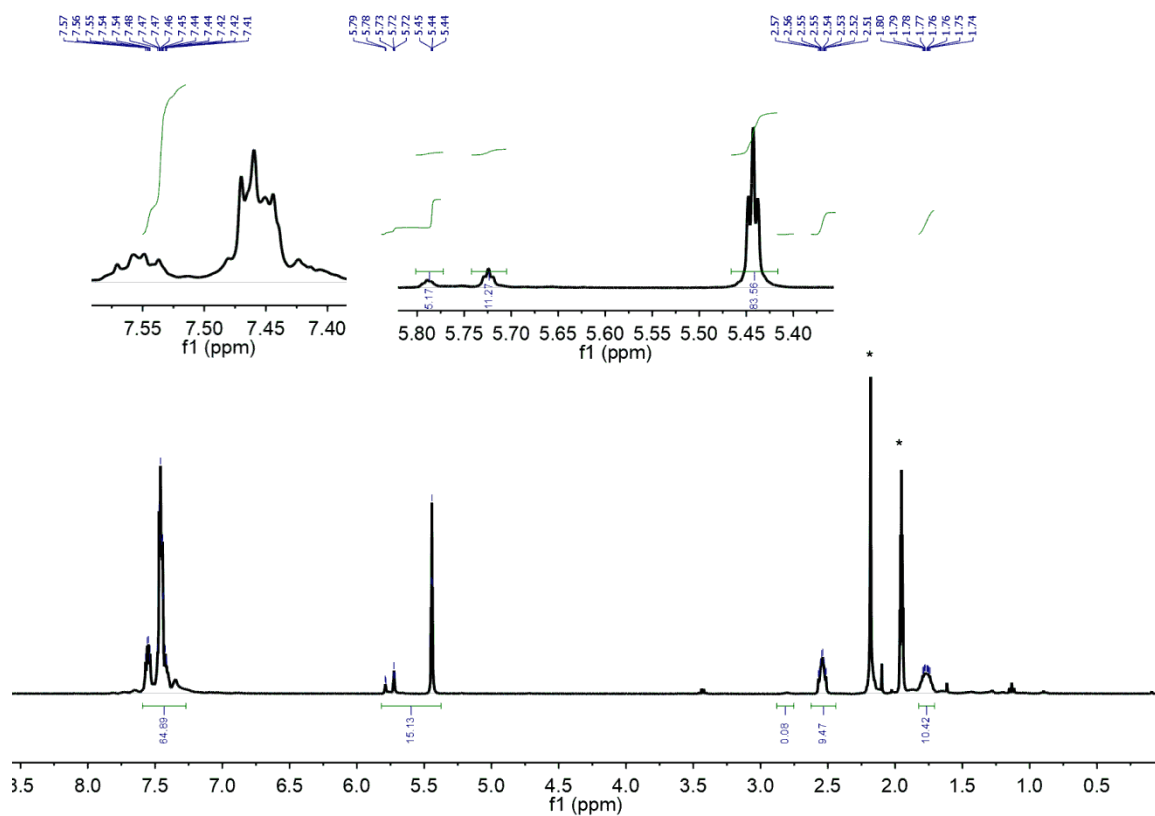

Figure S.39 – <sup>1</sup>H NMR (400 MHz, CD<sub>3</sub>CN, 25°C) spectrum of **9**

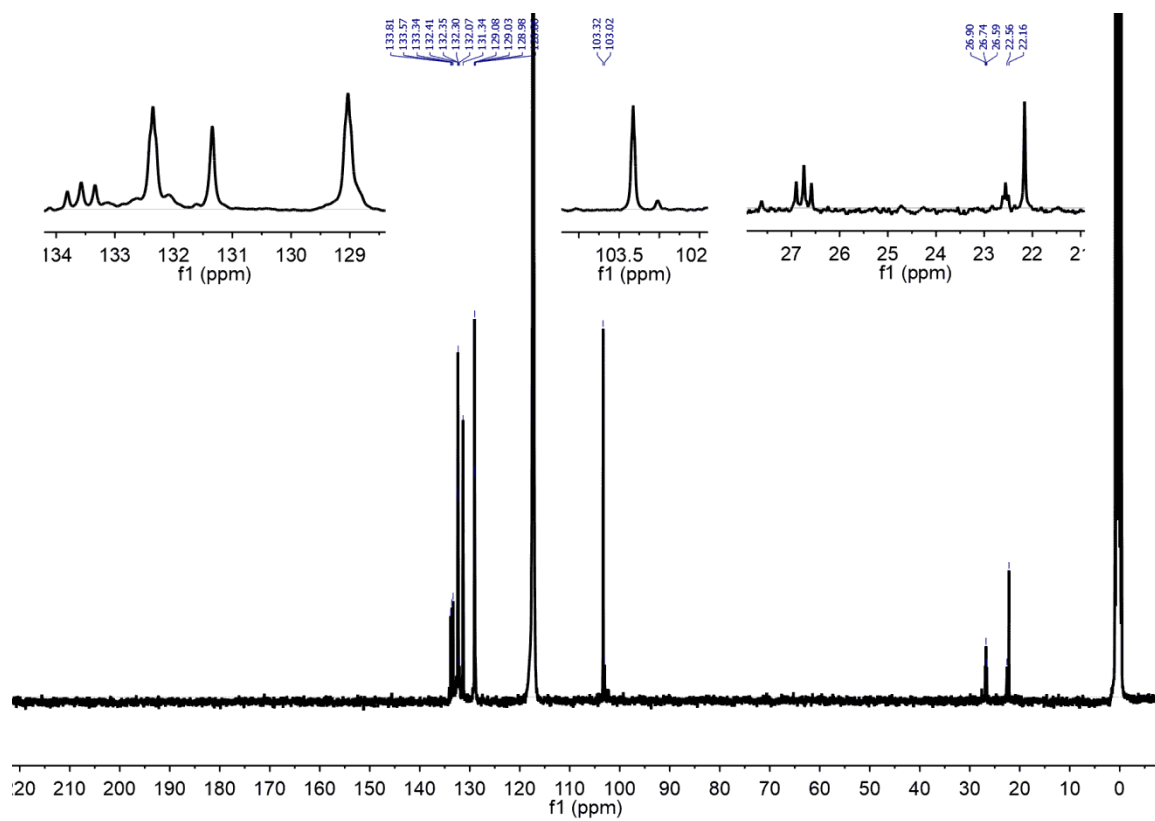

Figure S.40 – <sup>13</sup>C{<sup>1</sup>H} NMR (101 MHz, CD<sub>3</sub>CN, 25°C) spectrum of **9**

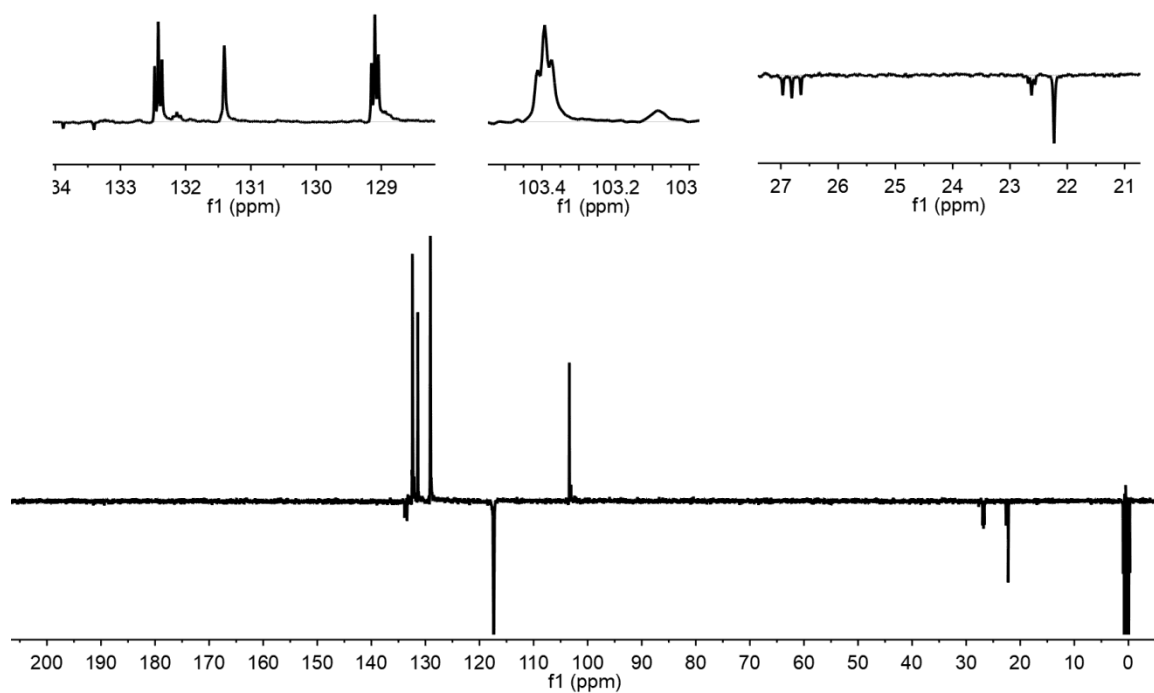

Figure S.41 – J-modulated  $^{13}\text{C}\{^1\text{H}\}$  NMR (101 MHz,  $\text{CD}_3\text{CN}$ ,  $25^\circ\text{C}$ ) spectrum of **9**

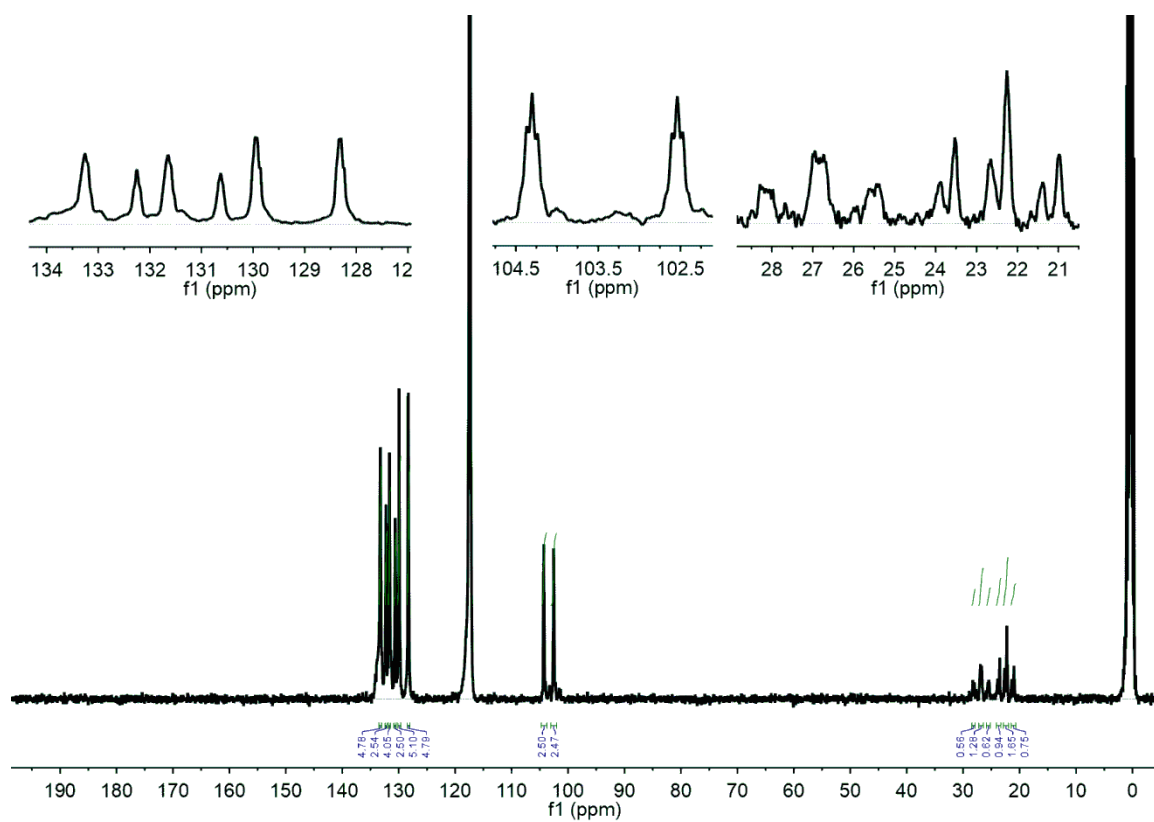

Figure S.42 –  $^{13}\text{C}\{^1\text{H}$ , gated decoupling mode} NMR (101 MHz,  $\text{CD}_3\text{CN}$ ,  $25^\circ\text{C}$ ) spectrum of **9**

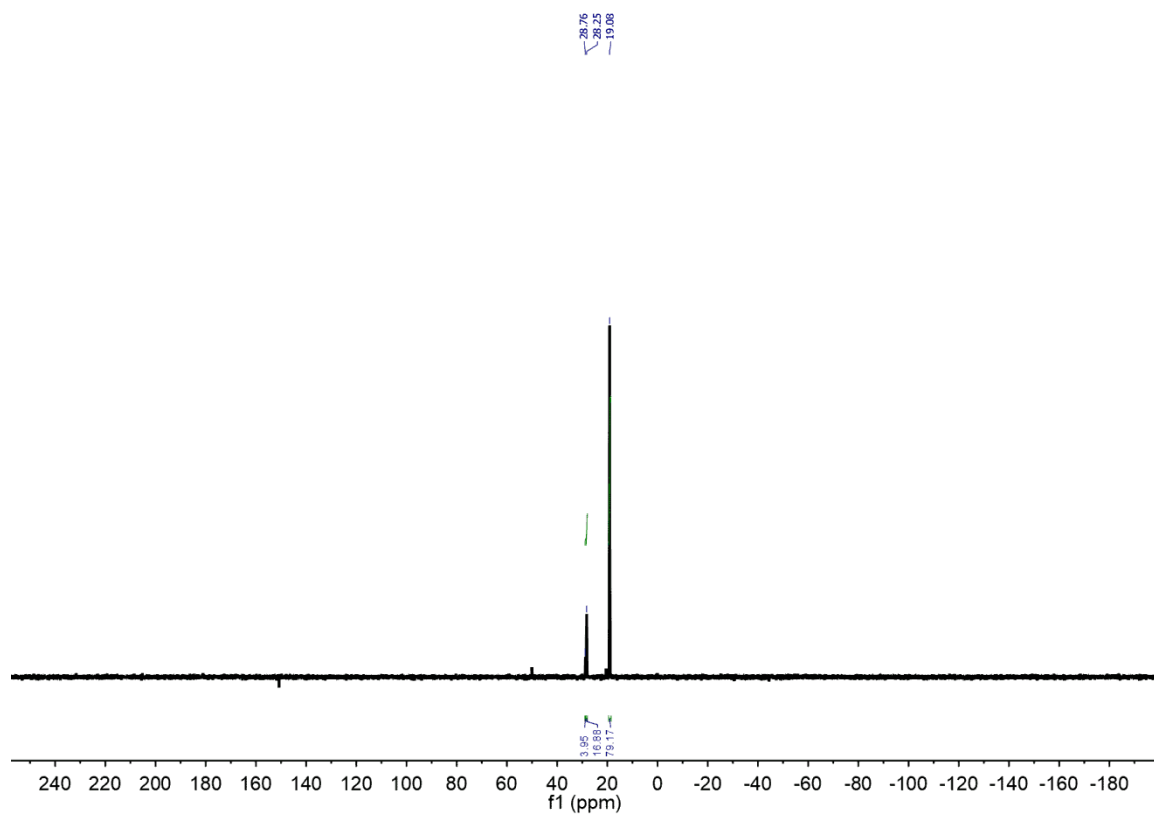

Figure S.43 –  $^{31}\text{P}\{^1\text{H}\}$  NMR (162 MHz,  $\text{CD}_3\text{CN}$ ,  $25^\circ\text{C}$ ) spectrum of **9**

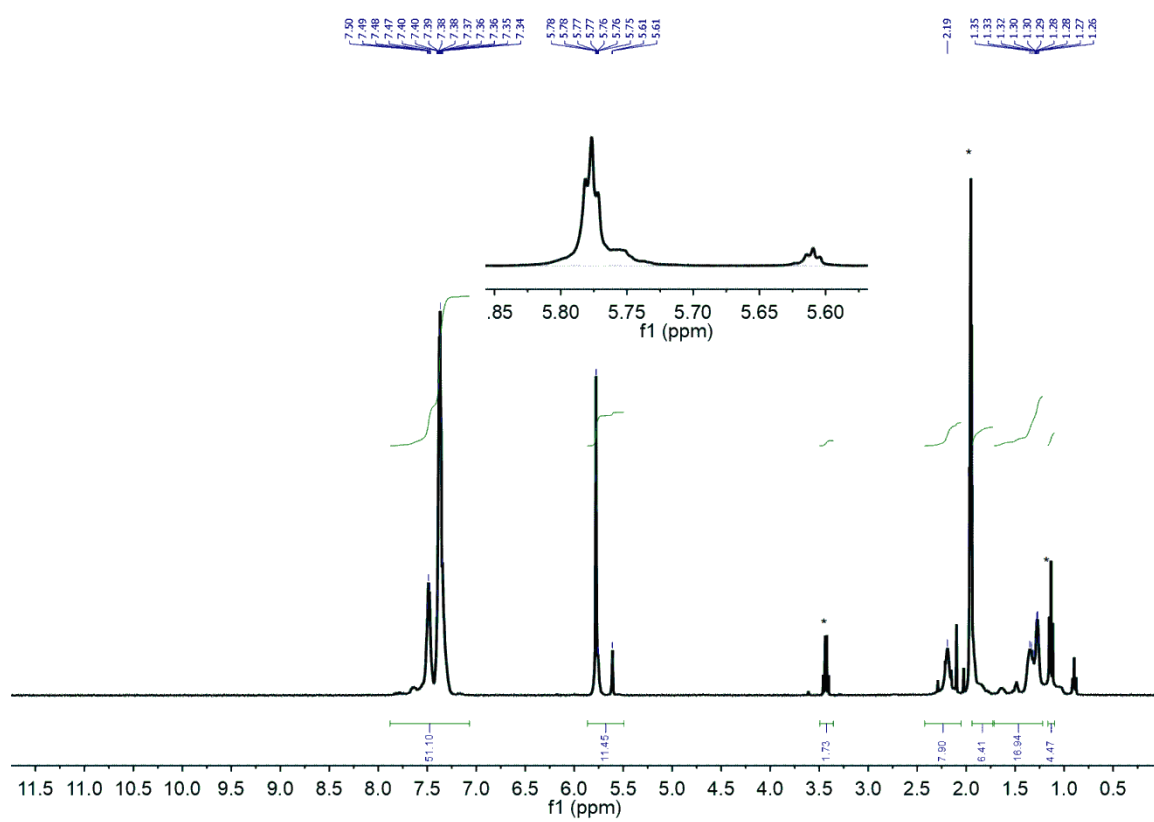

Figure S.44 –  $^1\text{H}$  NMR (400 MHz,  $\text{CD}_3\text{CN}$ ,  $25^\circ\text{C}$ ) spectrum of **10**



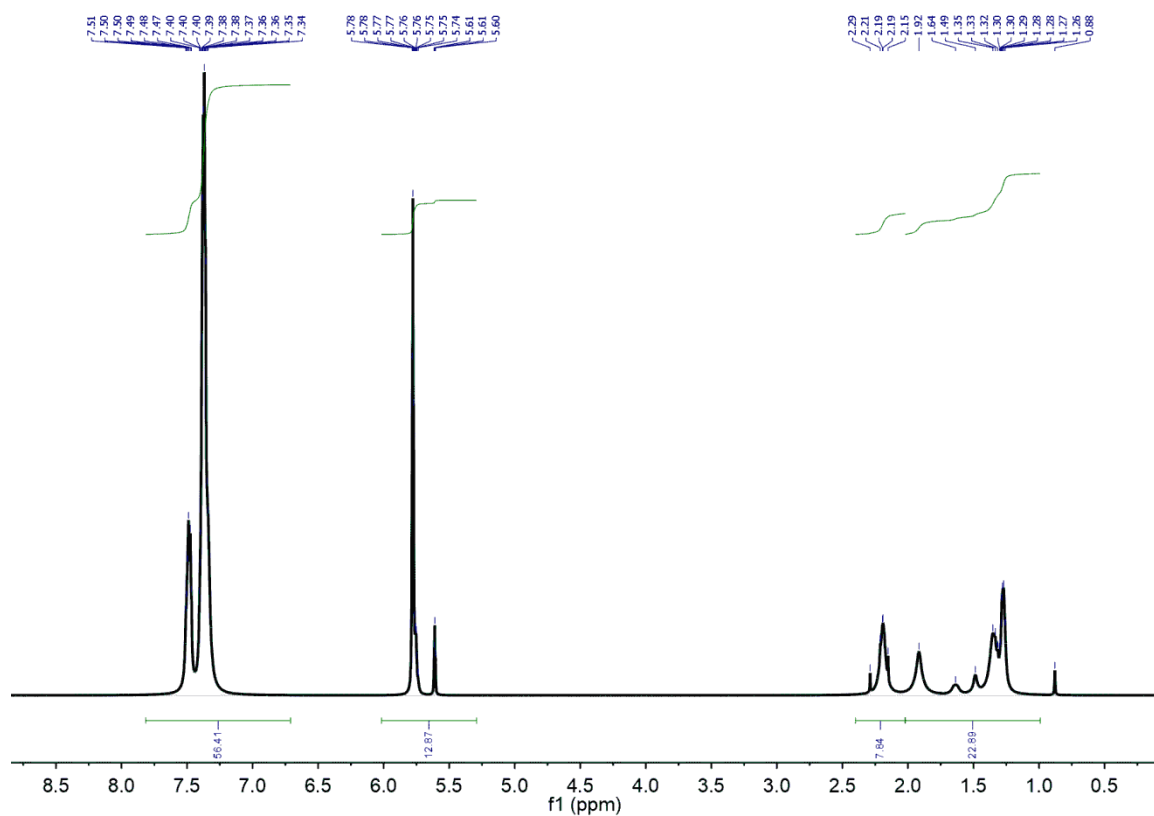

Figure S.45 –  $^1\text{H}$  (deconvoluted) NMR (400 MHz,  $\text{CD}_3\text{CN}$ ,  $25^\circ\text{C}$ ) spectrum of **10**

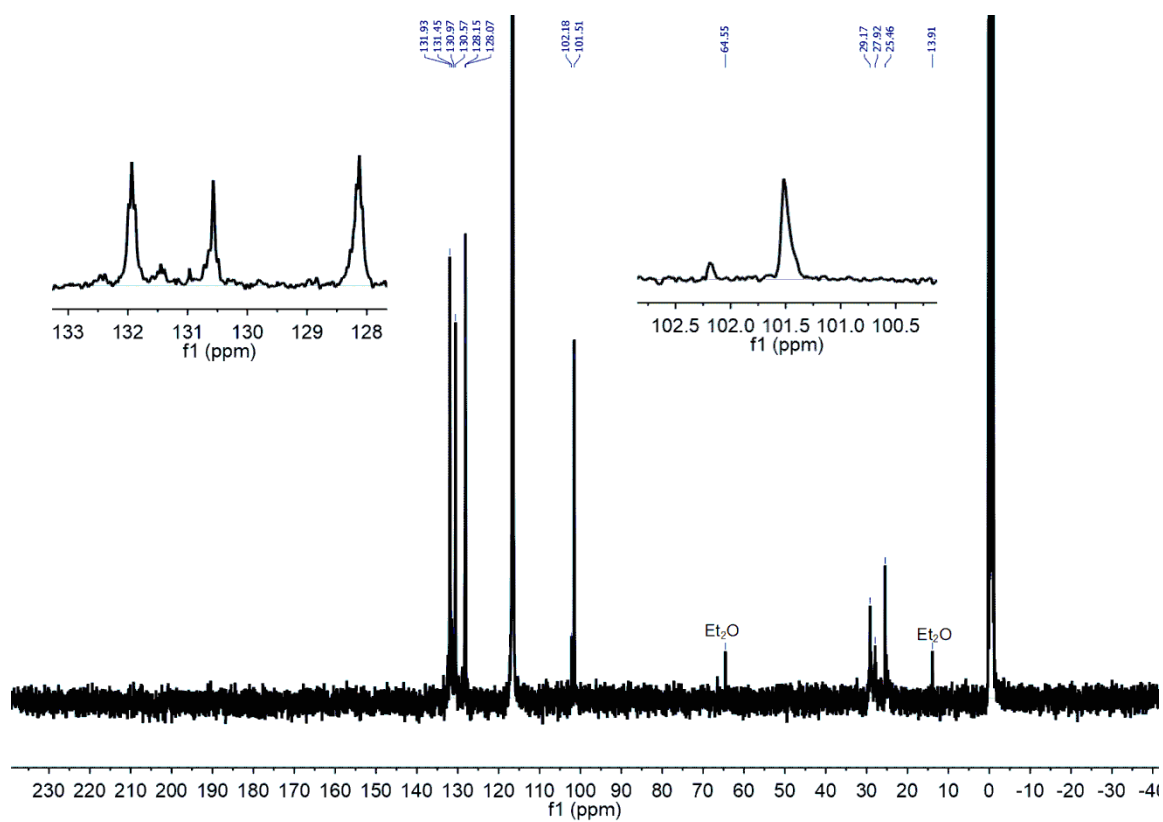

Figure S.46 –  $^{13}\text{C}\{^1\text{H}\}$  NMR (101 MHz,  $\text{CD}_3\text{CN}$ ,  $25^\circ\text{C}$ ) spectrum of **10**

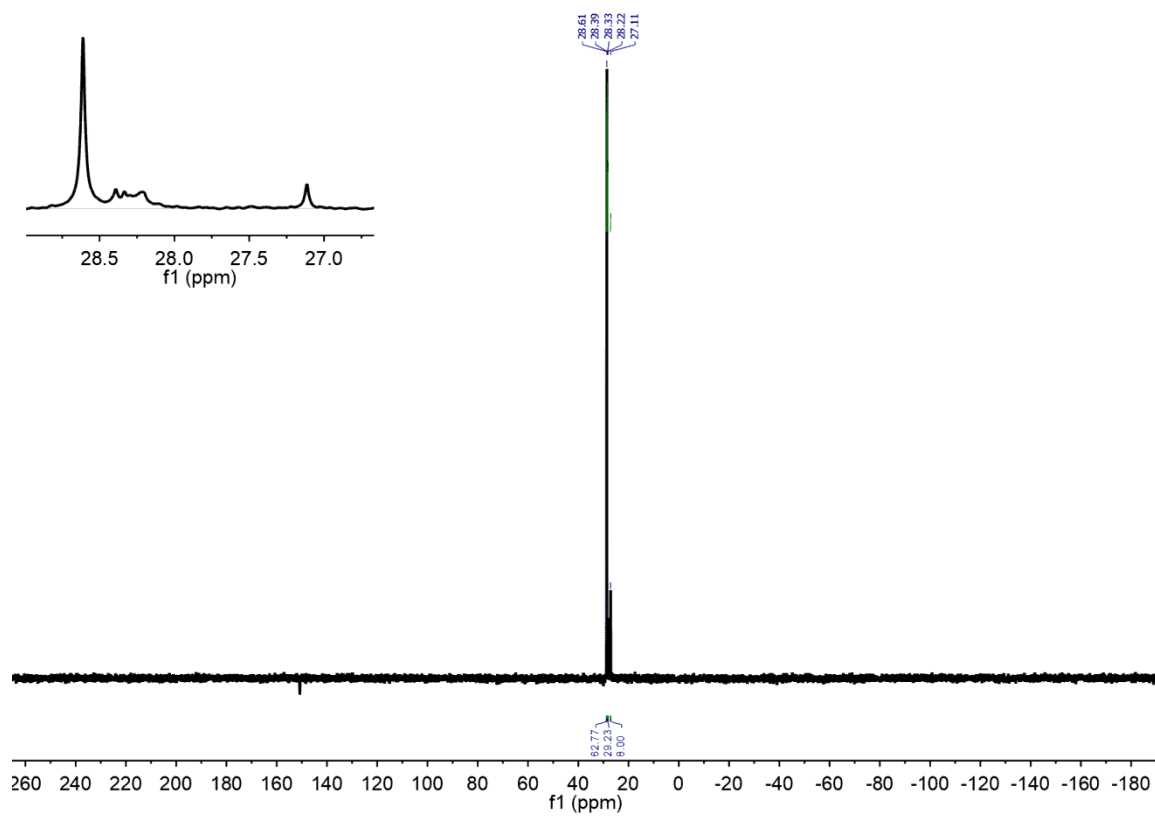

Figure S.47 –  $^{31}\text{P}\{^1\text{H}\}$  NMR (162 MHz,  $\text{CD}_3\text{CN}$ ,  $25^\circ\text{C}$ ) spectrum of **10**

## S.4 FTIR spectra

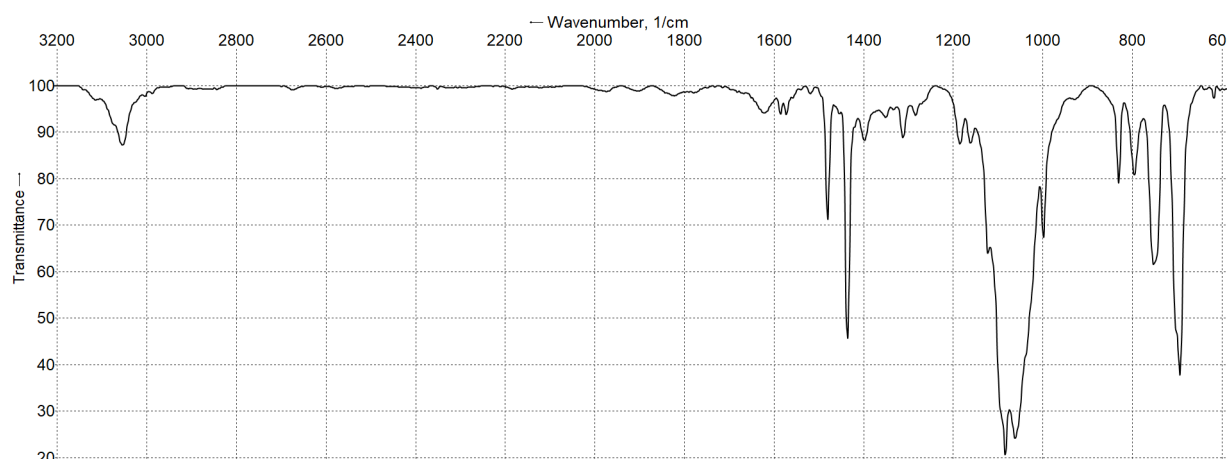

Figure S.48 – FTIR spectrum of **1** (KBr)

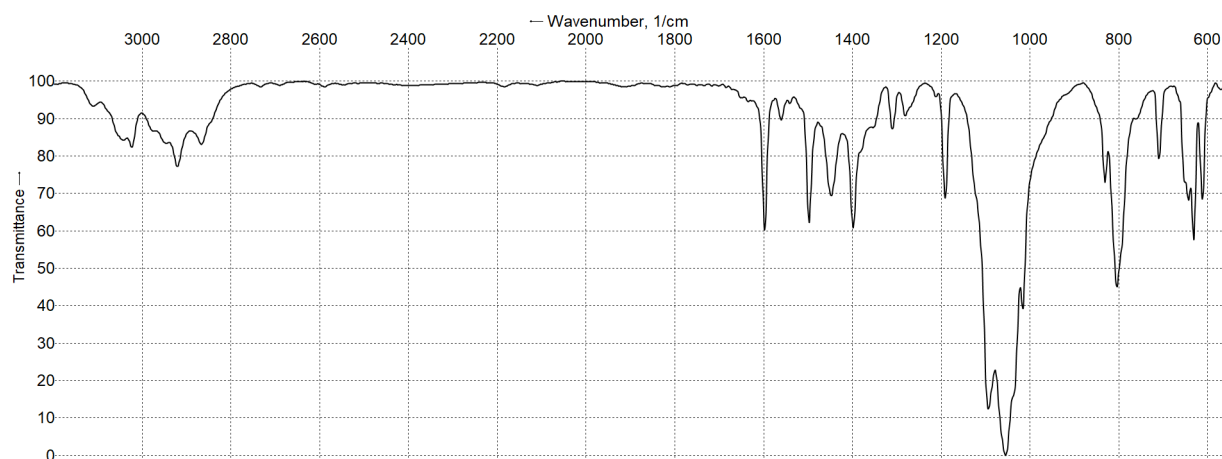

Figure S.49 – FTIR spectrum of **2** (KBr)

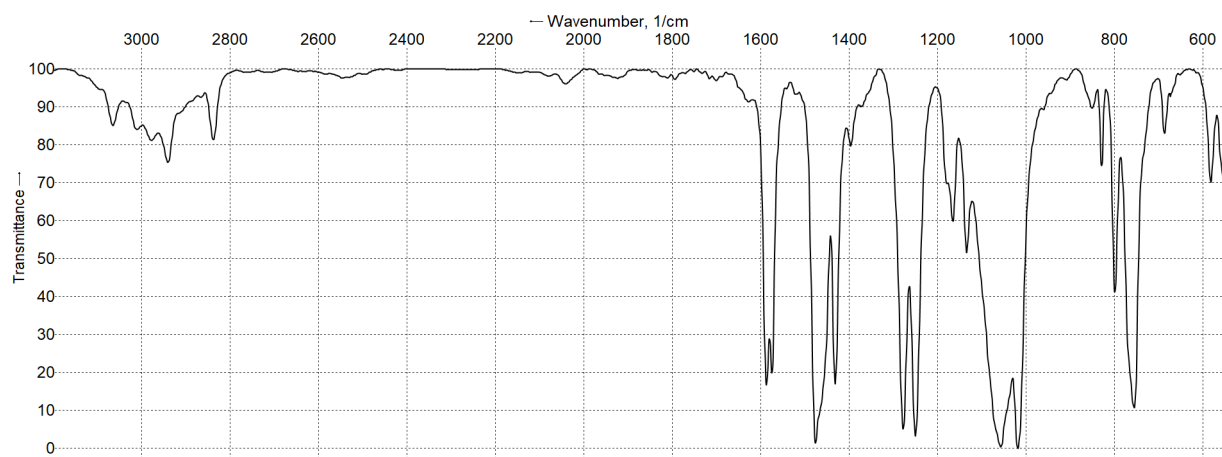

Figure S.50 – FTIR spectrum of **3** (KBr)

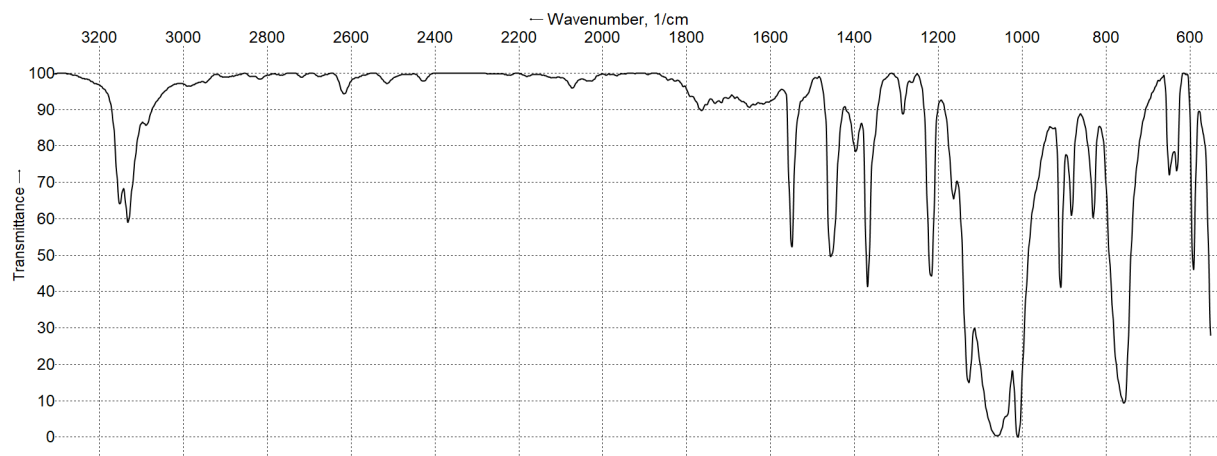

Figure S.51 – FTIR spectrum of **4** (KBr)

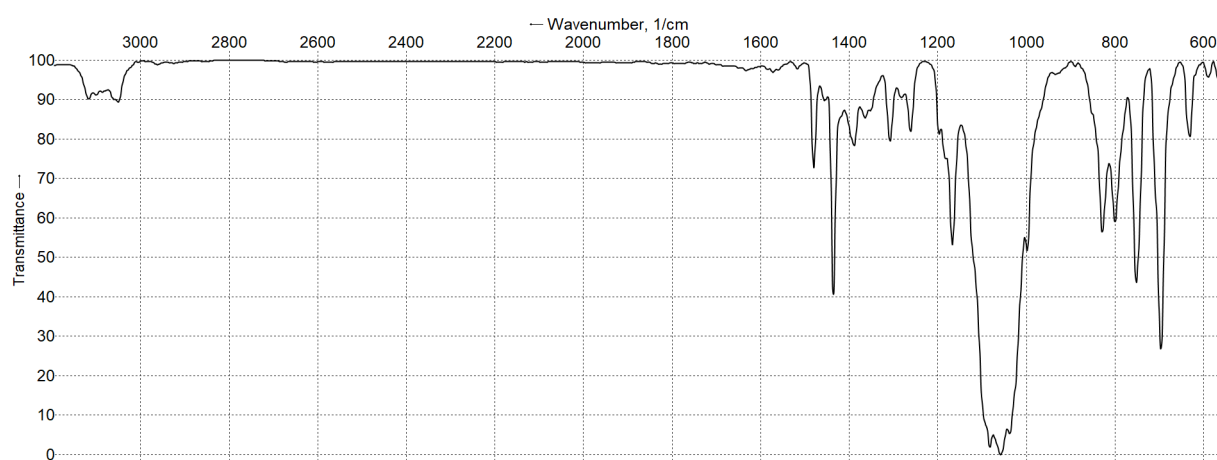

Figure S.52 – FTIR spectrum of **6** (KBr)

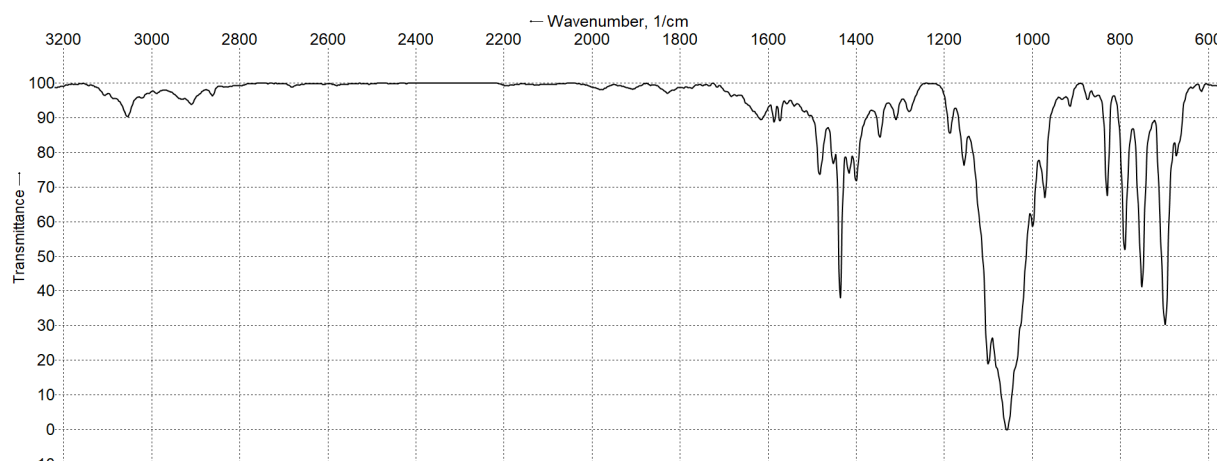

Figure S.53 – FTIR spectrum of **7** (KBr)

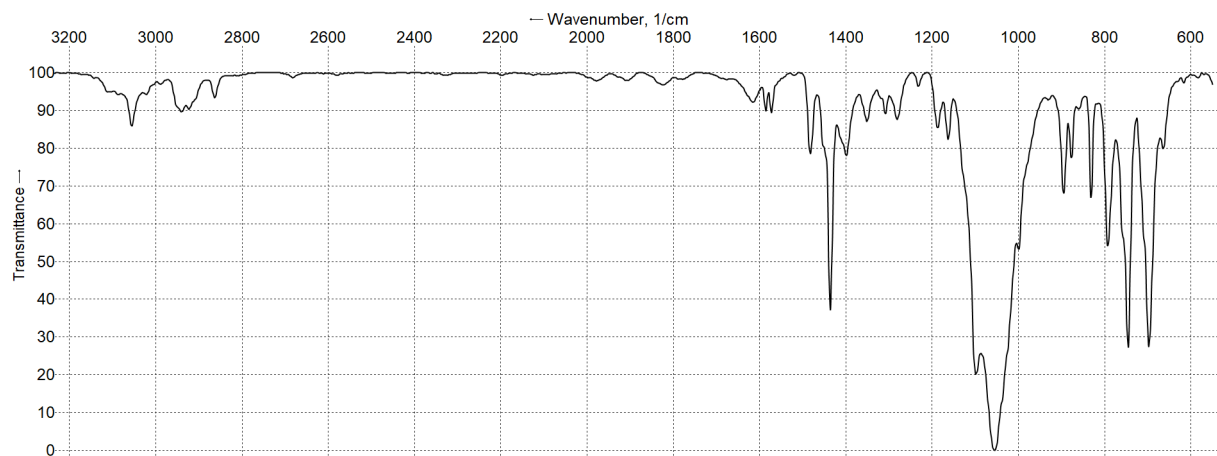

Figure S.54 – FTIR spectrum of **8** (KBr)

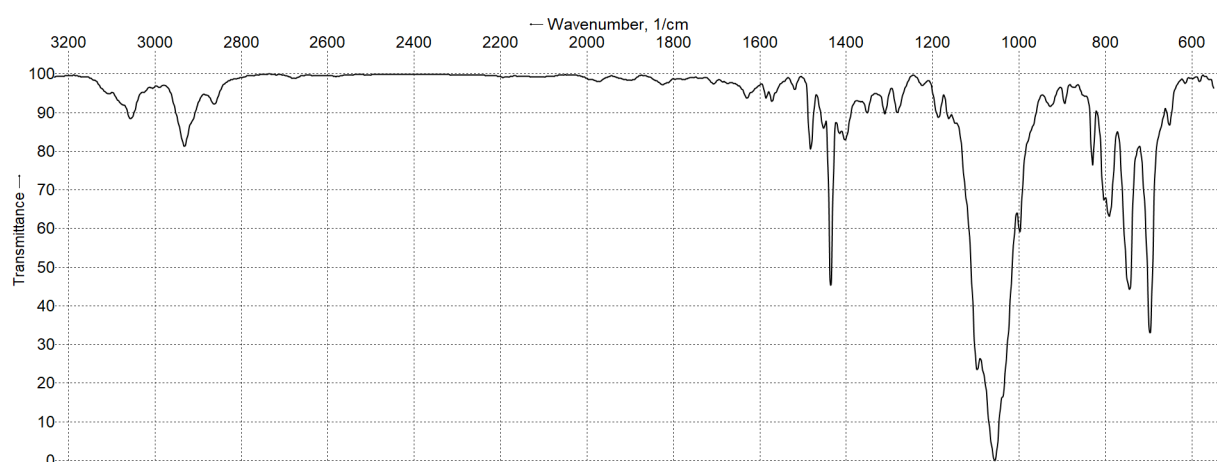

Figure S.55 – FTIR spectrum of **9** (KBr)

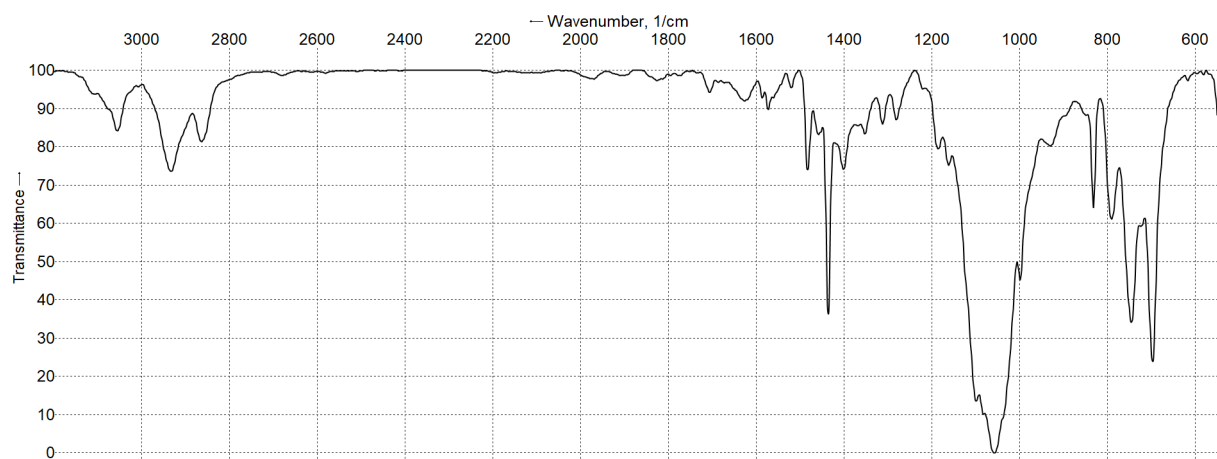

Figure S.56 – FTIR spectrum of **10** (KBr)

## S.5 ESI-MS spectra

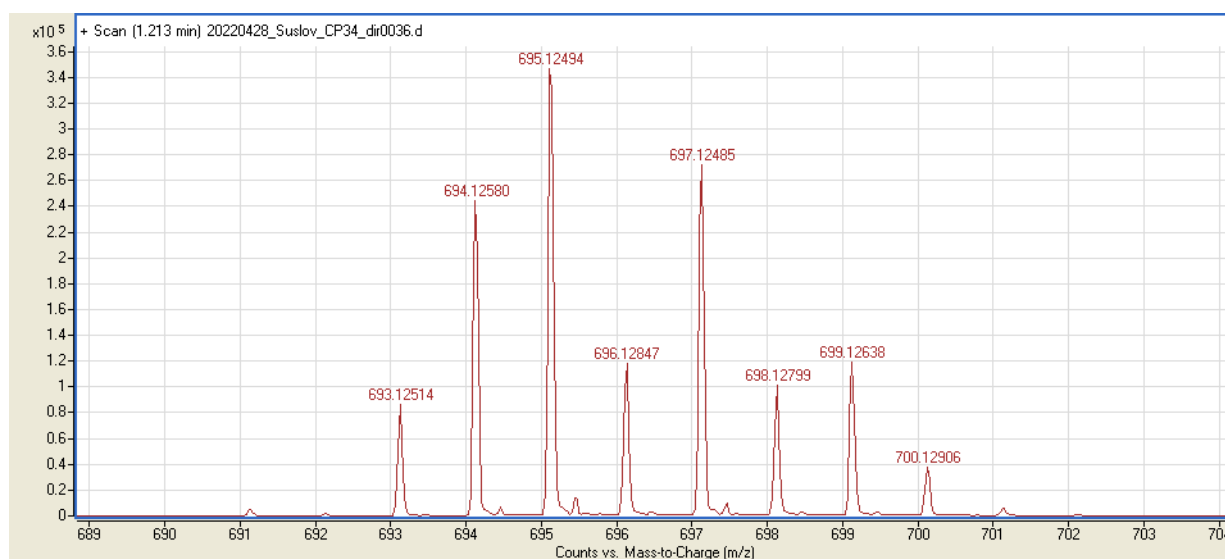

Figure S.57 – MS spectrum of **1** (MeCN, positive ion mode)

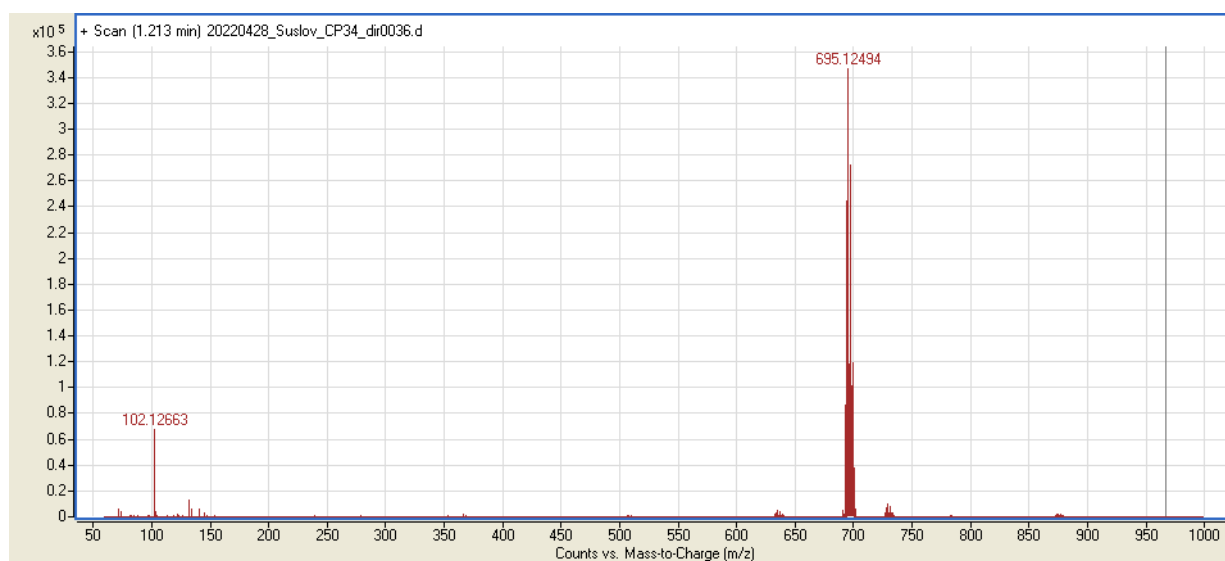

Figure S.58 – MS spectrum of **1** (MeCN, positive ion mode)

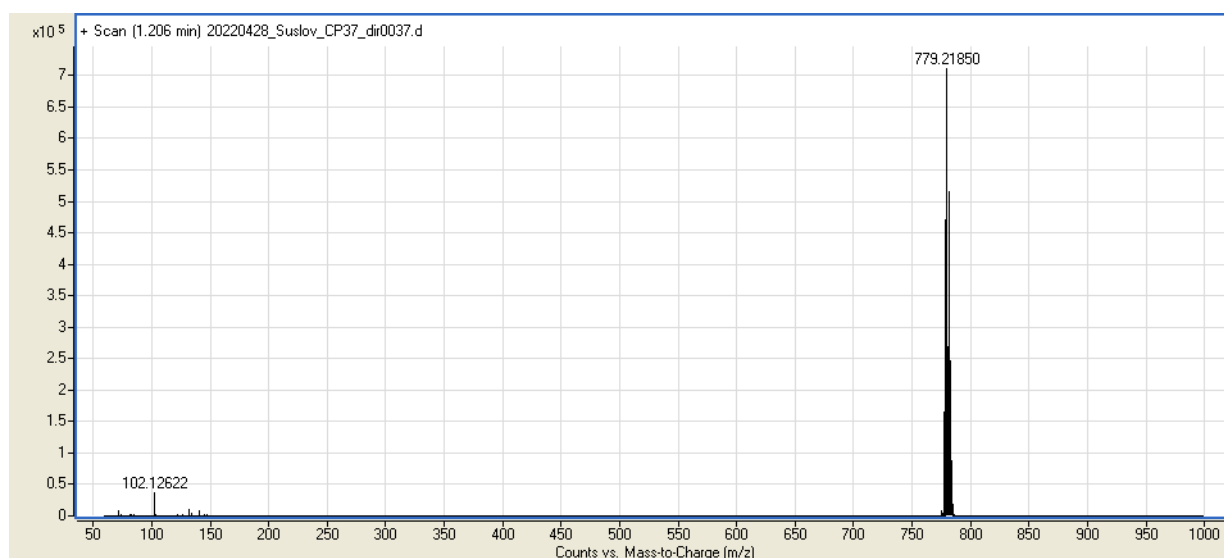

Figure S.59 – MS spectrum of **2** (MeCN, positive ion mode)

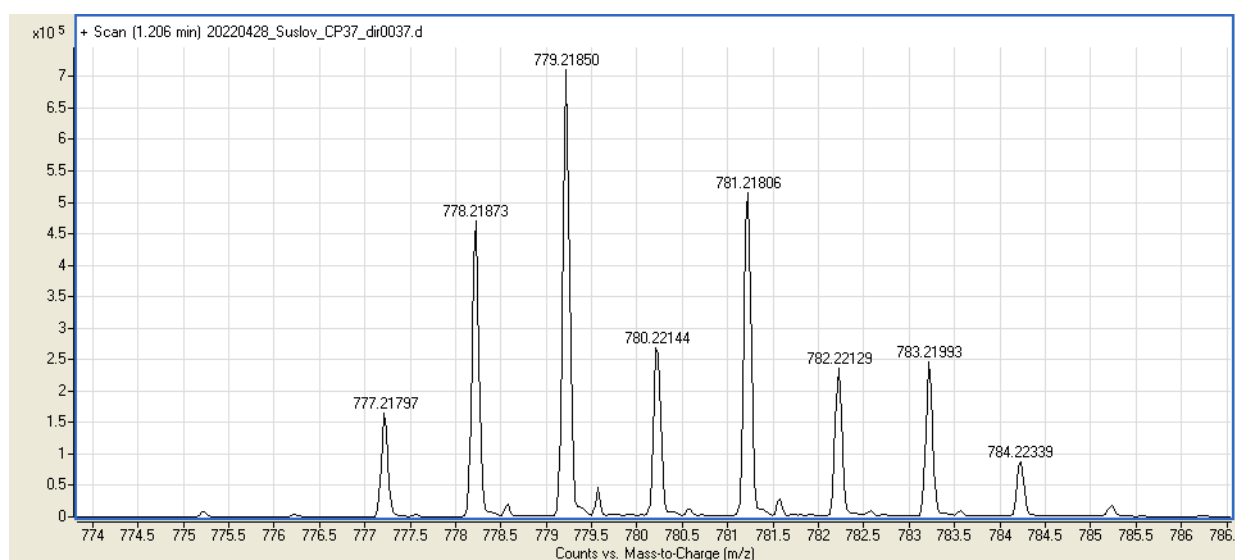

Figure S.60 – MS spectrum of **2** (MeCN, positive ion mode)

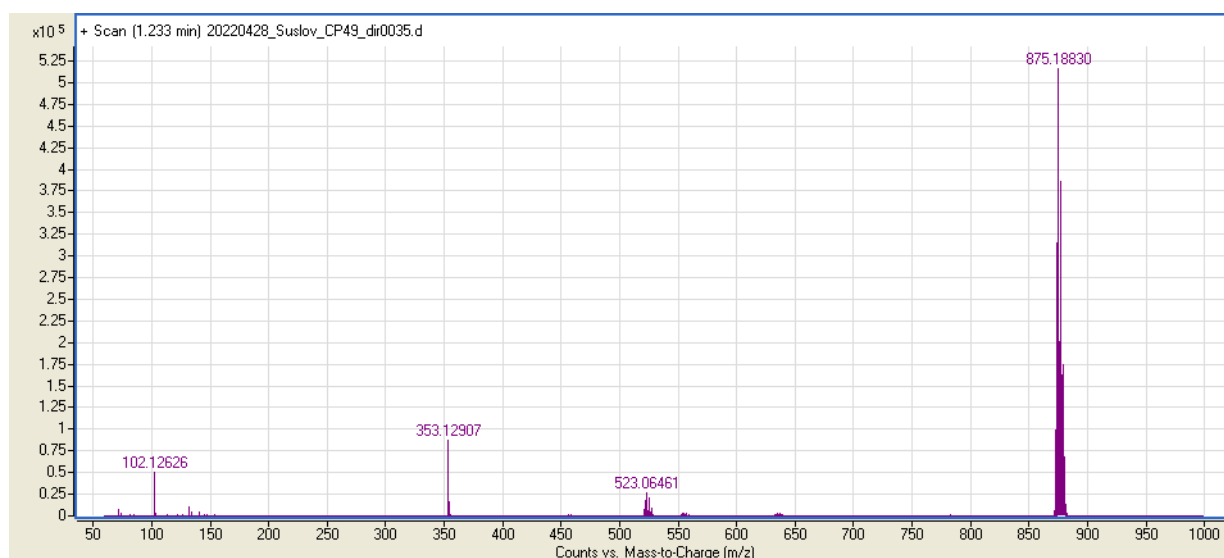

Figure S.61 – MS spectrum of **3** (MeCN, positive ion mode)

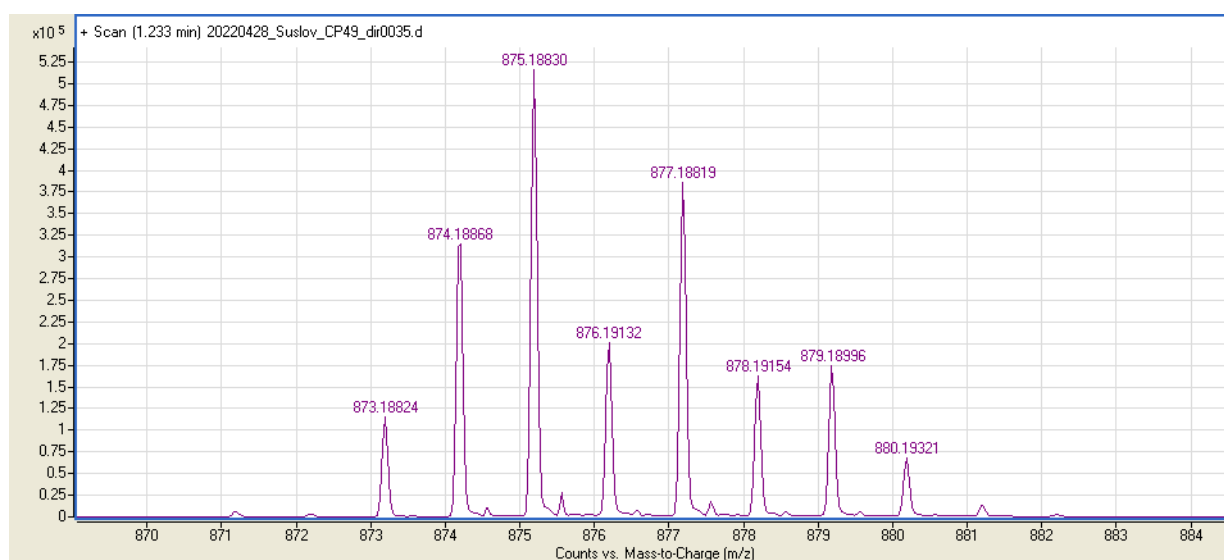

Figure S.62 – MS spectrum of **3** (MeCN, positive ion mode)



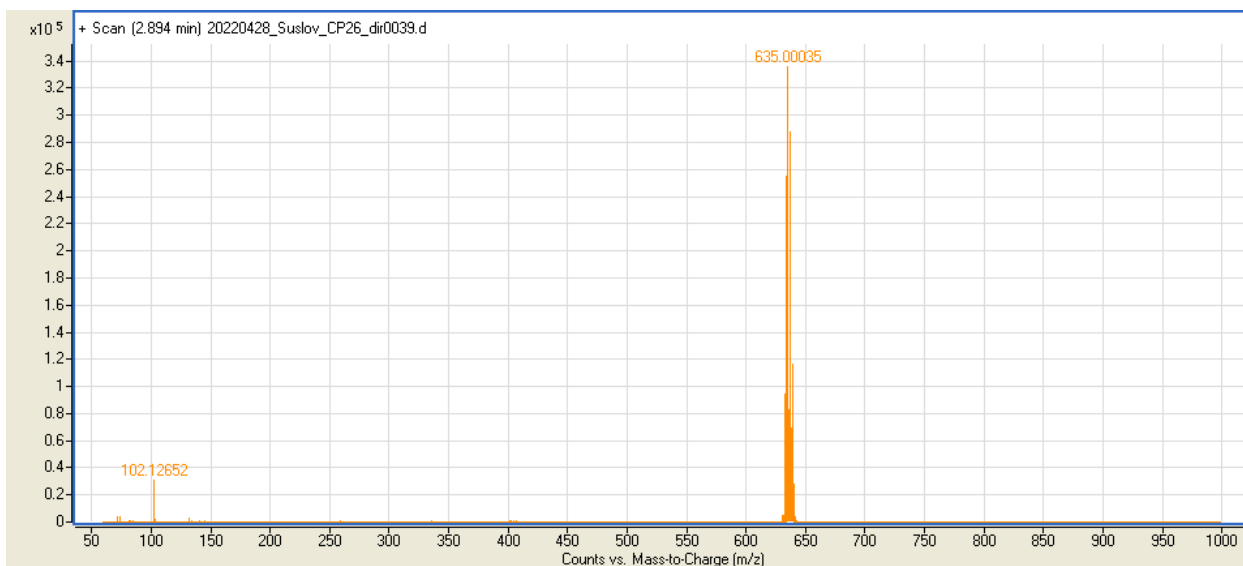

Figure S.63 – MS spectrum of **4** (MeCN, positive ion mode)

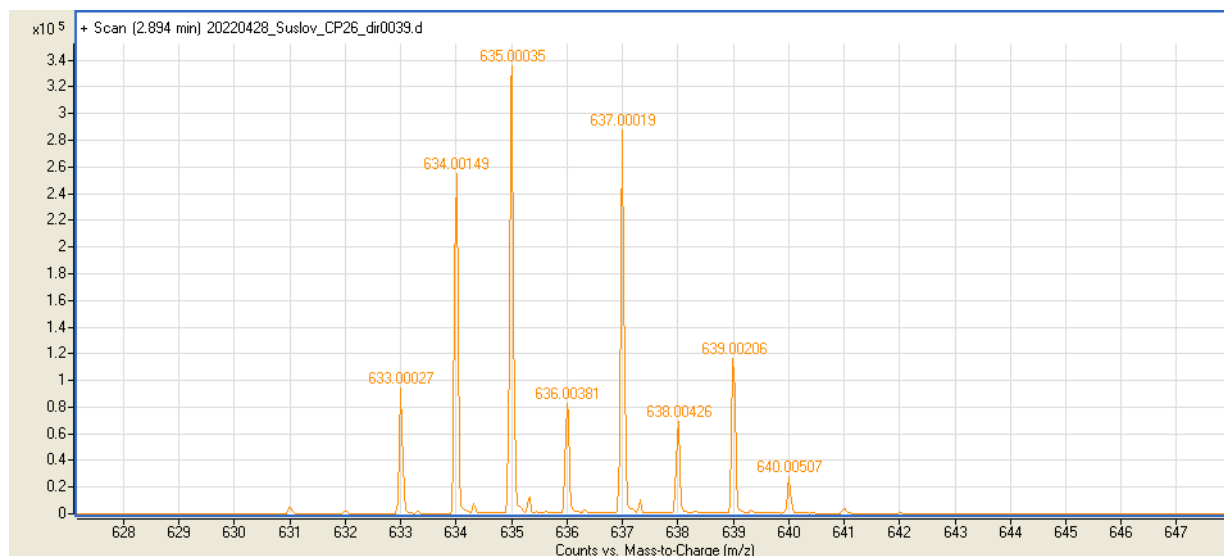

Figure S.64 – MS spectrum of **4** (MeCN, positive ion mode)

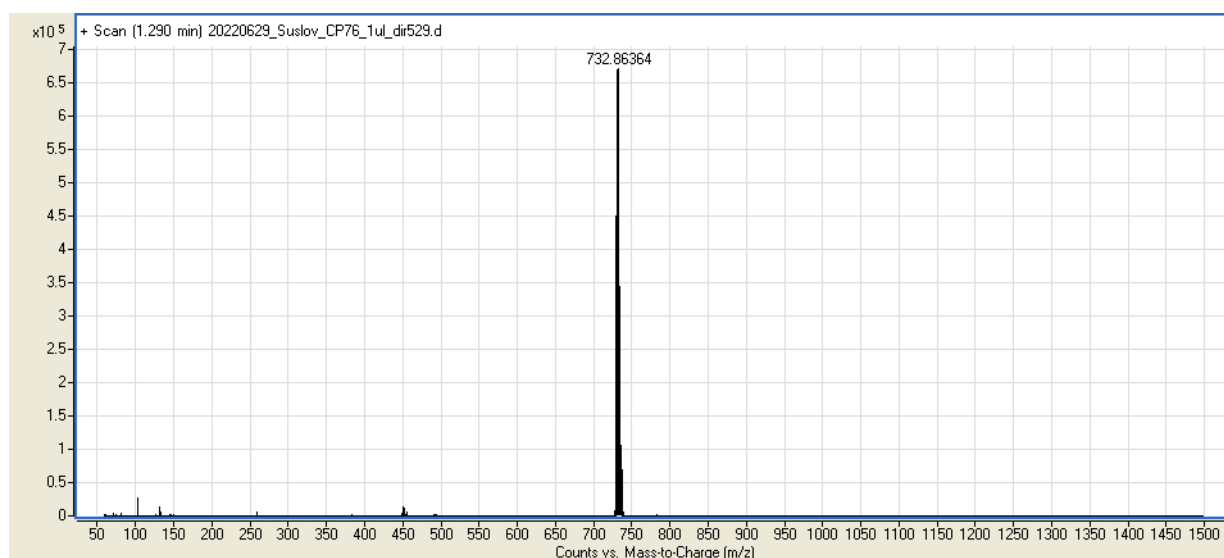

Figure S.65 – MS spectrum of **5** (MeCN, positive ion mode)

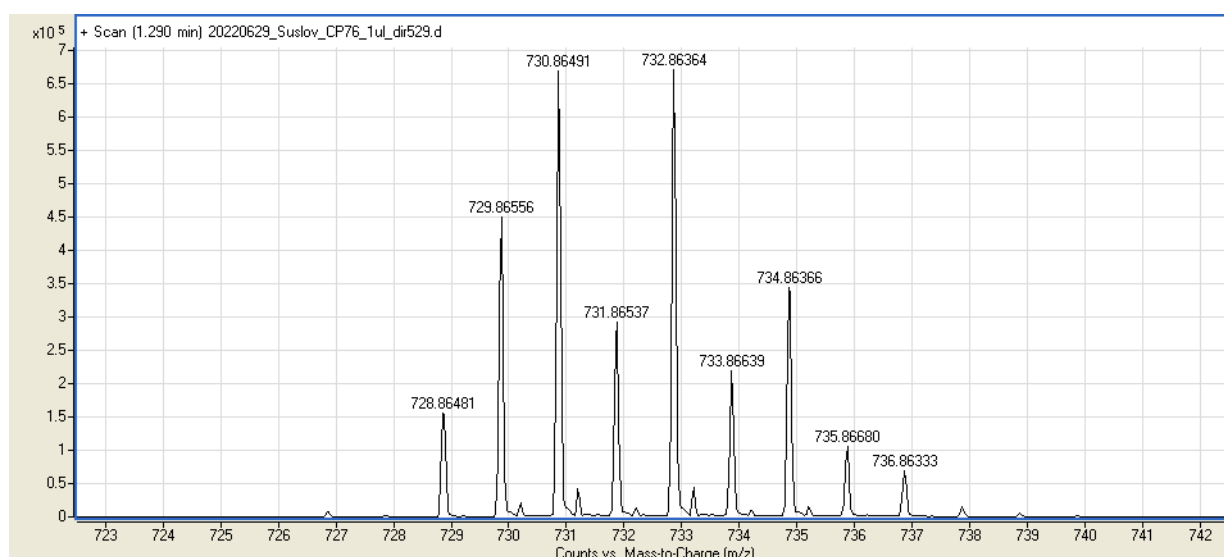

Figure S.66 – MS spectrum of **5** (MeCN, positive ion mode)

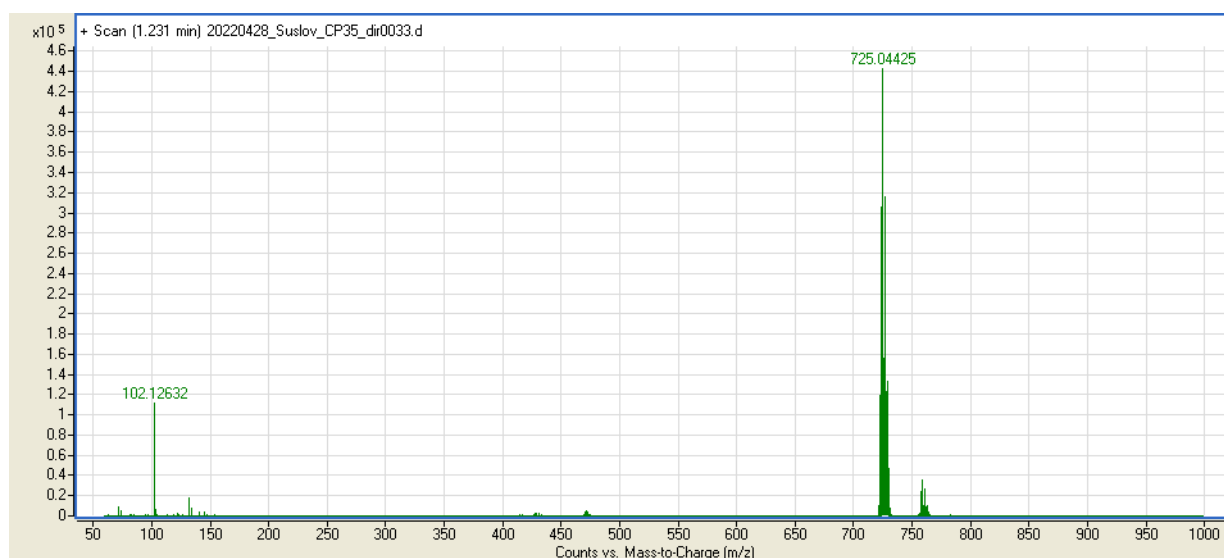

Figure S.67 – MS spectrum of **6** (MeCN, positive ion mode)

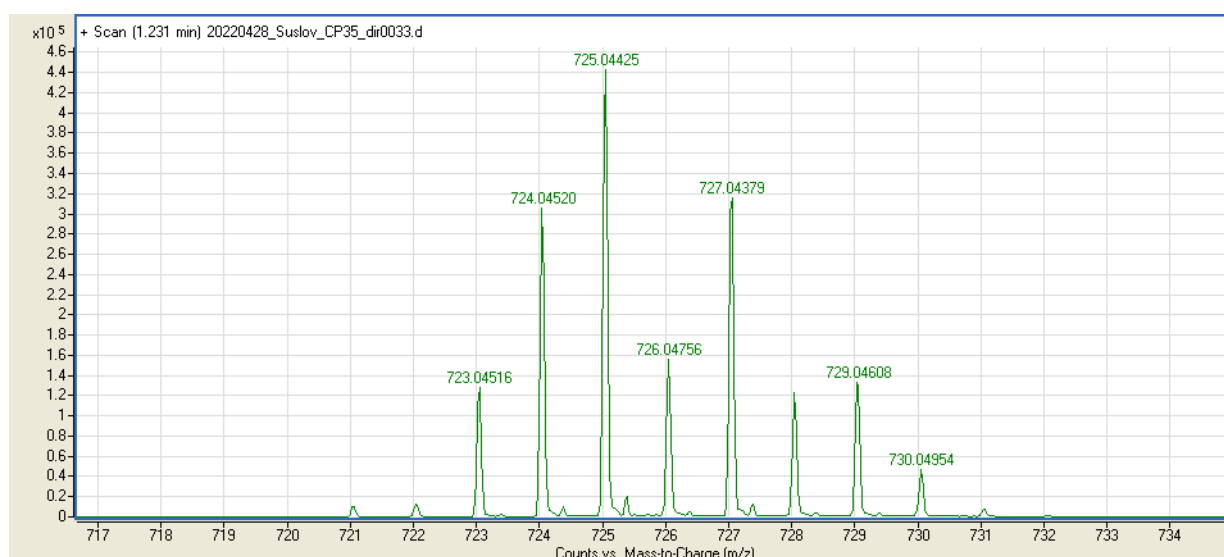

Figure S.68 – MS spectrum of **6** (MeCN, positive ion mode)

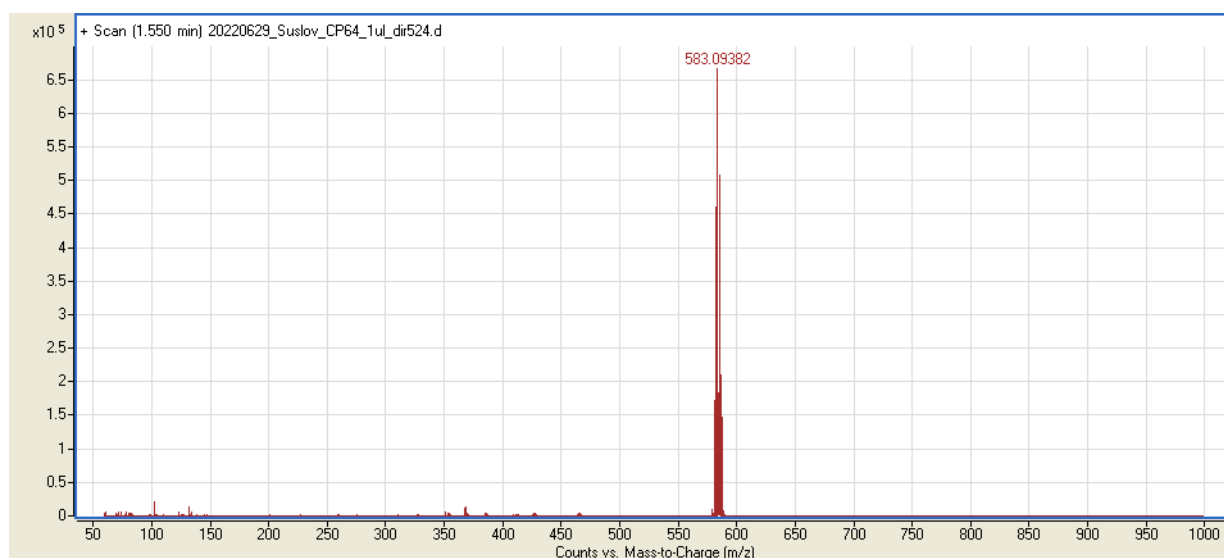

Figure S.69 – MS spectrum of **7** (MeCN, positive ion mode)

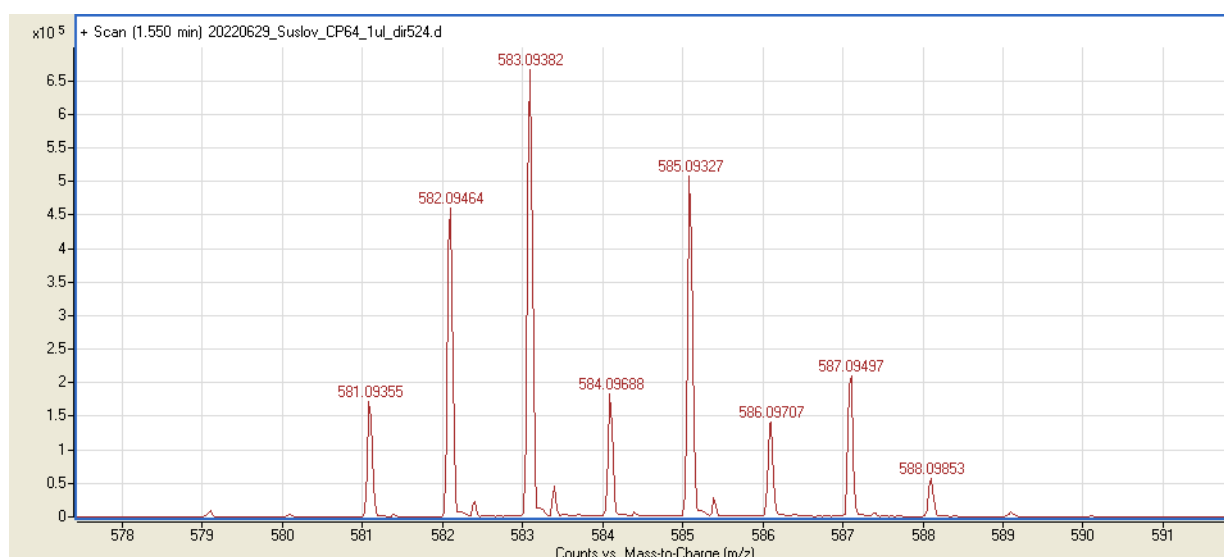

Figure S.70 – MS spectrum of **7** (MeCN, positive ion mode)

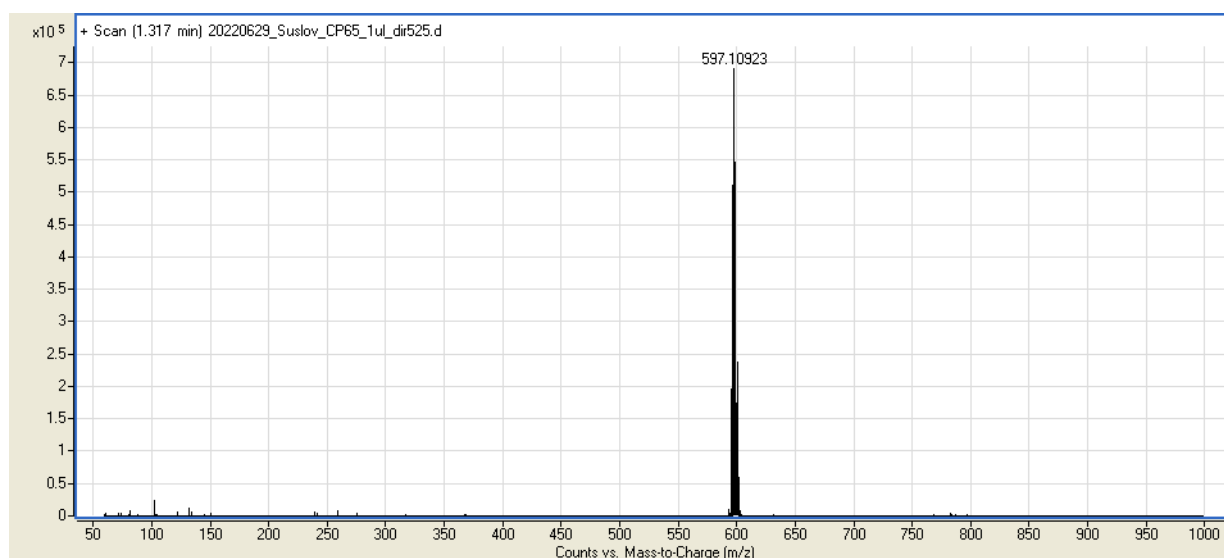

Figure S.71 – MS spectrum of **8** (MeCN, positive ion mode)

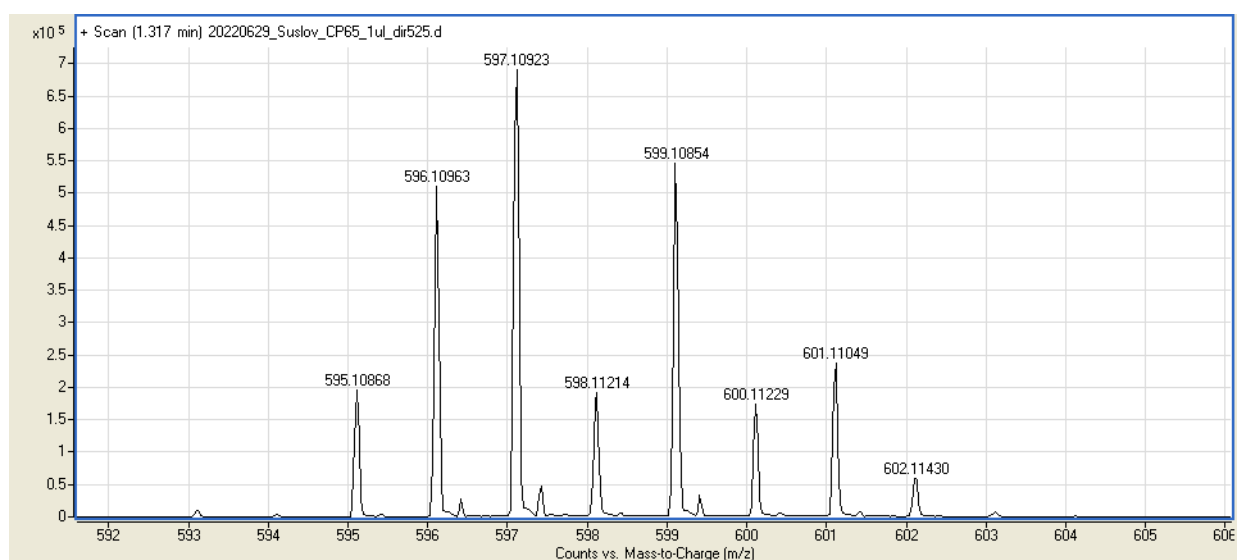

Figure S.72 – MS spectrum of **8** (MeCN, positive ion mode)

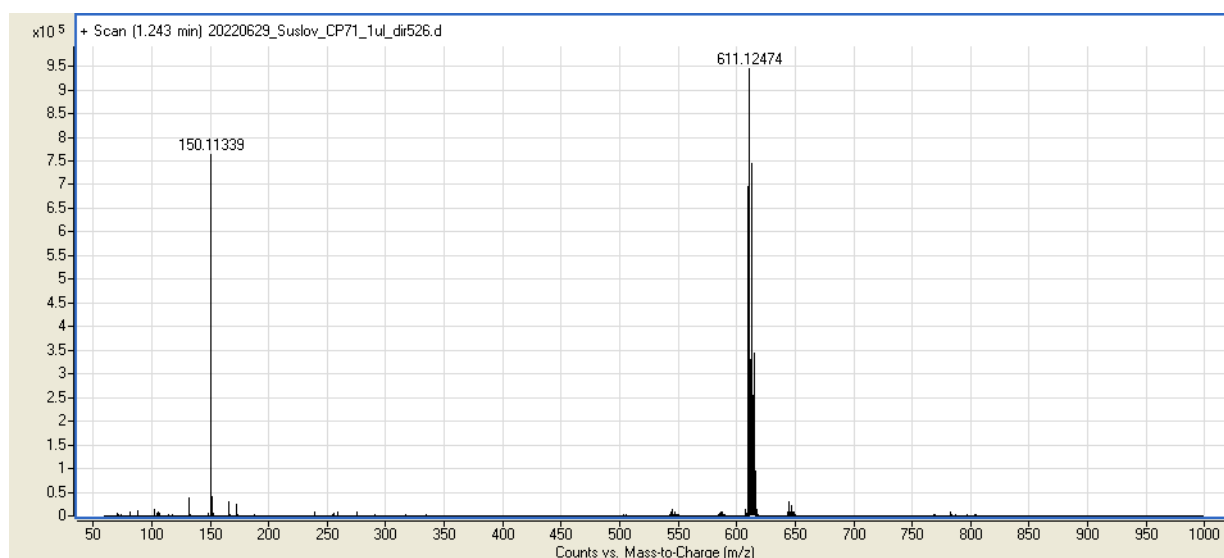

Figure S.73 – MS spectrum of **9** (MeCN, positive ion mode)

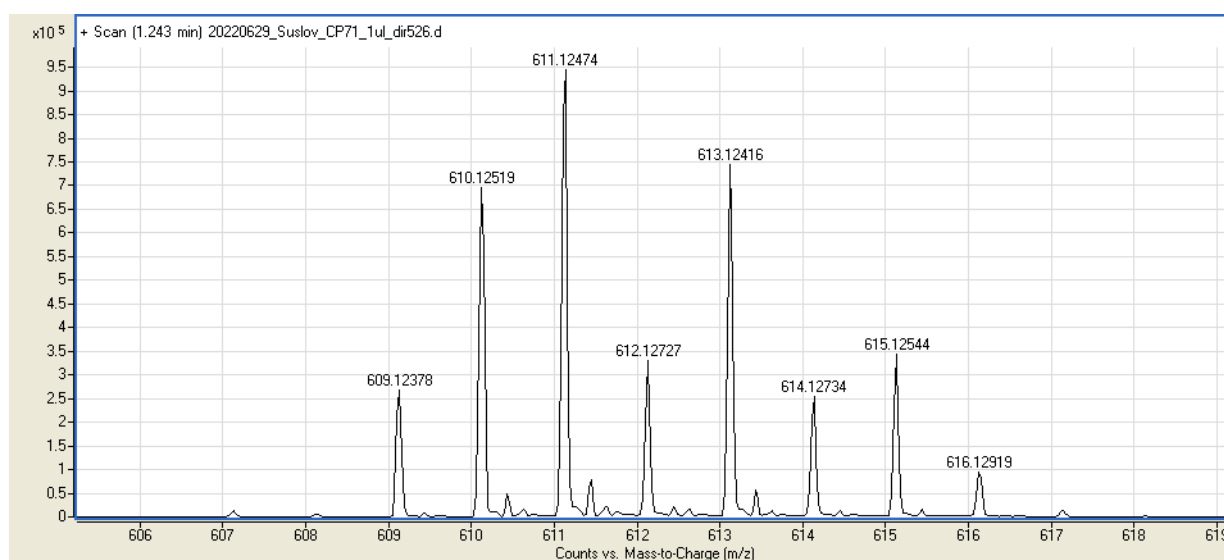

Figure S.74 – MS spectrum of **9** (MeCN, positive ion mode)

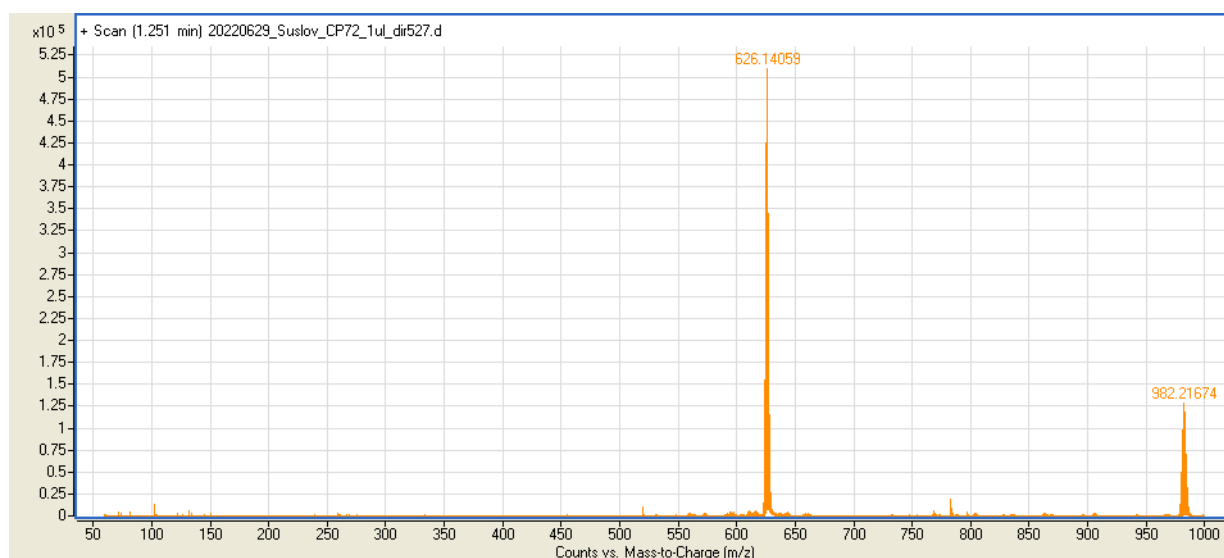

Figure S.75 – MS spectrum of **10** (MeCN, positive ion mode)

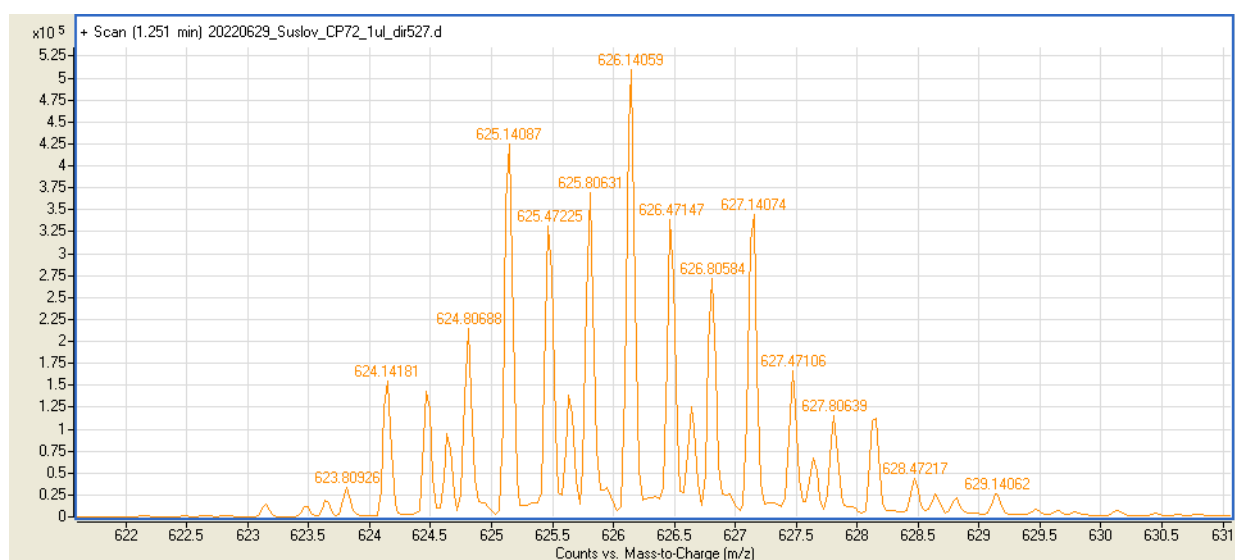

Figure S.76 – MS spectrum of **10** (MeCN, positive ion mode)

## S.6 UV-vis spectra

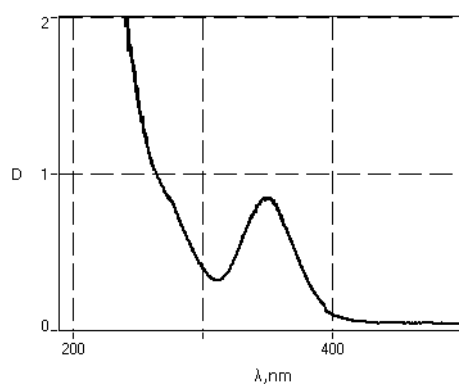

Figure S.77 – UV-vis spectrum of **1** ( $C = 0.5$  mM, solvent – 1,2- $C_2H_4Cl_2$ )

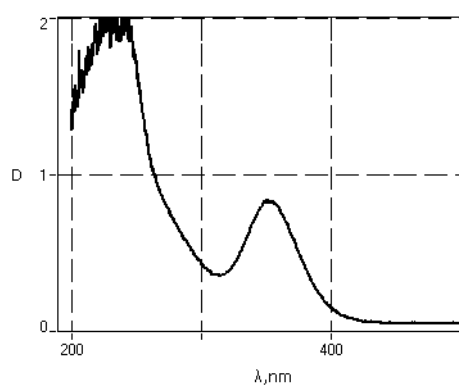

Figure S.78 – UV-vis spectrum of **2** ( $C = 0.5$  mM, solvent – 1,2- $C_2H_4Cl_2$ )

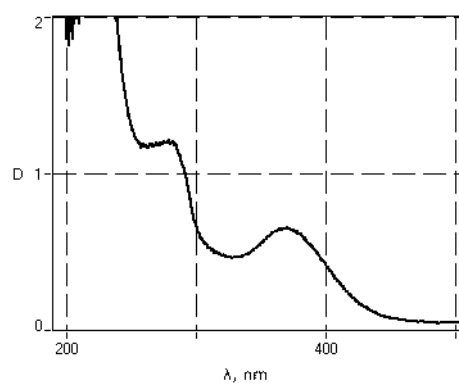

Figure S.79 – UV-vis spectrum of **3** ( $C = 0.5$  mM, solvent – 1,2- $C_2H_4Cl_2$ )



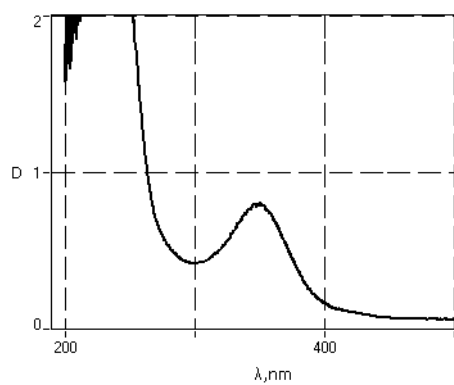

Figure S.80 – UV-vis spectrum of **4** ( $C = 0.5$  mM, solvent – 1,2- $C_2H_4Cl_2$ )

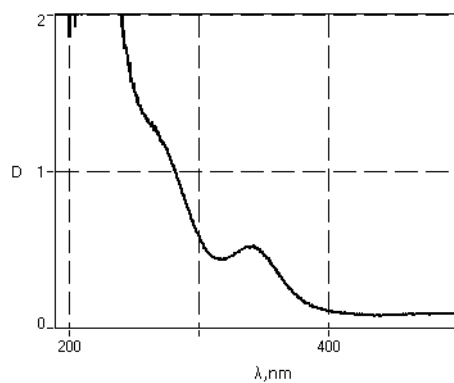

Figure S.81 – UV-vis spectrum of **6** ( $C = 0.5$  mM, solvent – 1,2- $C_2H_4Cl_2$ )

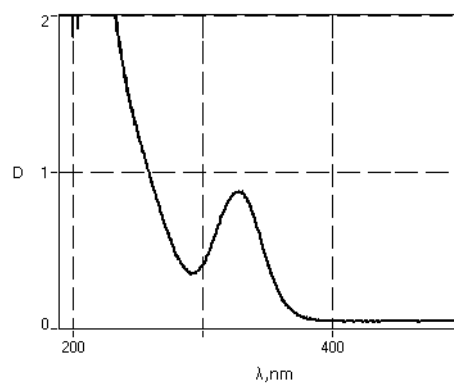

Figure S.82 – UV-vis spectrum of **7** ( $C = 0.5$  mM, solvent – 1,2- $C_2H_4Cl_2$ )

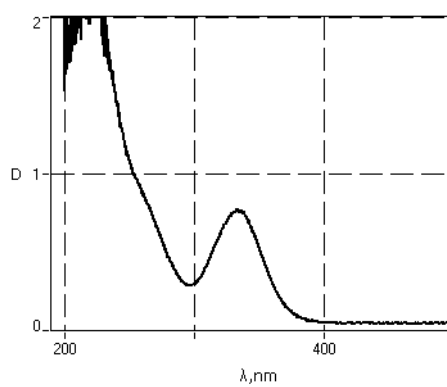

Figure S.83 – UV-vis spectrum of **8** ( $C = 0.5$  mM, solvent – 1,2- $C_2H_4Cl_2$ )

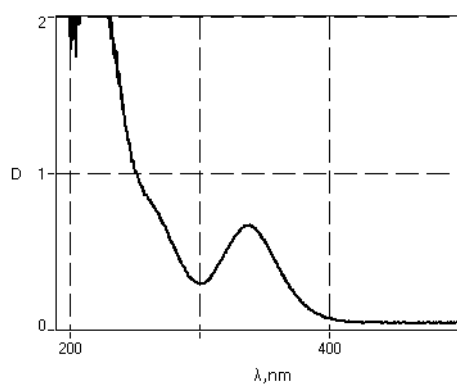

Figure S.84 – UV-vis spectrum of **9** ( $C = 0.5$  mM, solvent – 1,2- $C_2H_4Cl_2$ )

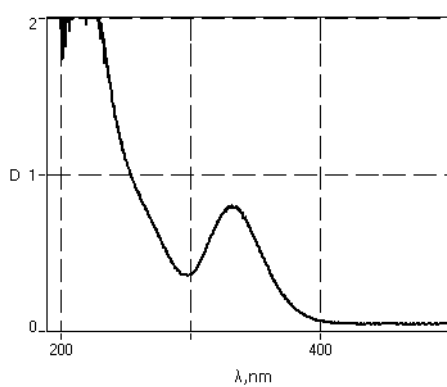

Figure S.85 – UV-vis spectrum of **10** ( $C = 0.5$  mM, solvent – 1,2- $C_2H_4Cl_2$ )

S.7 Reaction of  $[\text{Pd}(\kappa^2\text{-O,O'-acac})(\text{TOMPP})_2]\text{BF}_4$  with  $\text{BF}_3\cdot\text{OEt}_2$  in the presence of MeCN

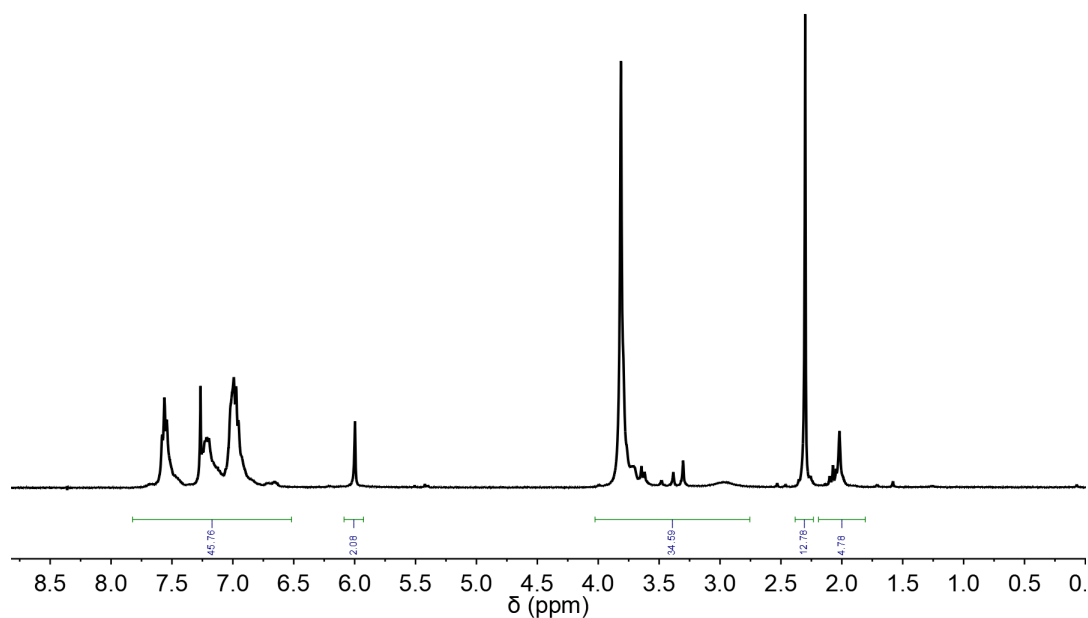

Figure S.86 –  $^1\text{H}$  NMR (400 MHz,  $\text{CDCl}_3$ ,  $25^\circ\text{C}$ ) spectrum

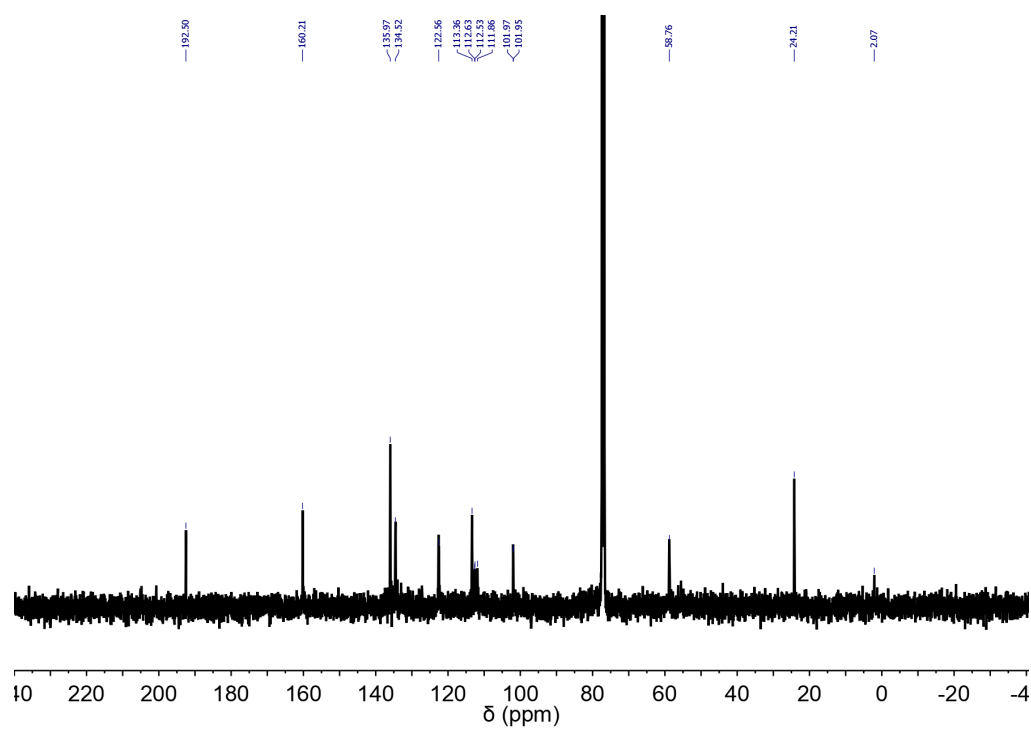

Figure S.87 –  $^{13}\text{C}\{^1\text{H}\}$  NMR (101 MHz,  $\text{CDCl}_3$ ,  $25^\circ\text{C}$ ) spectrum

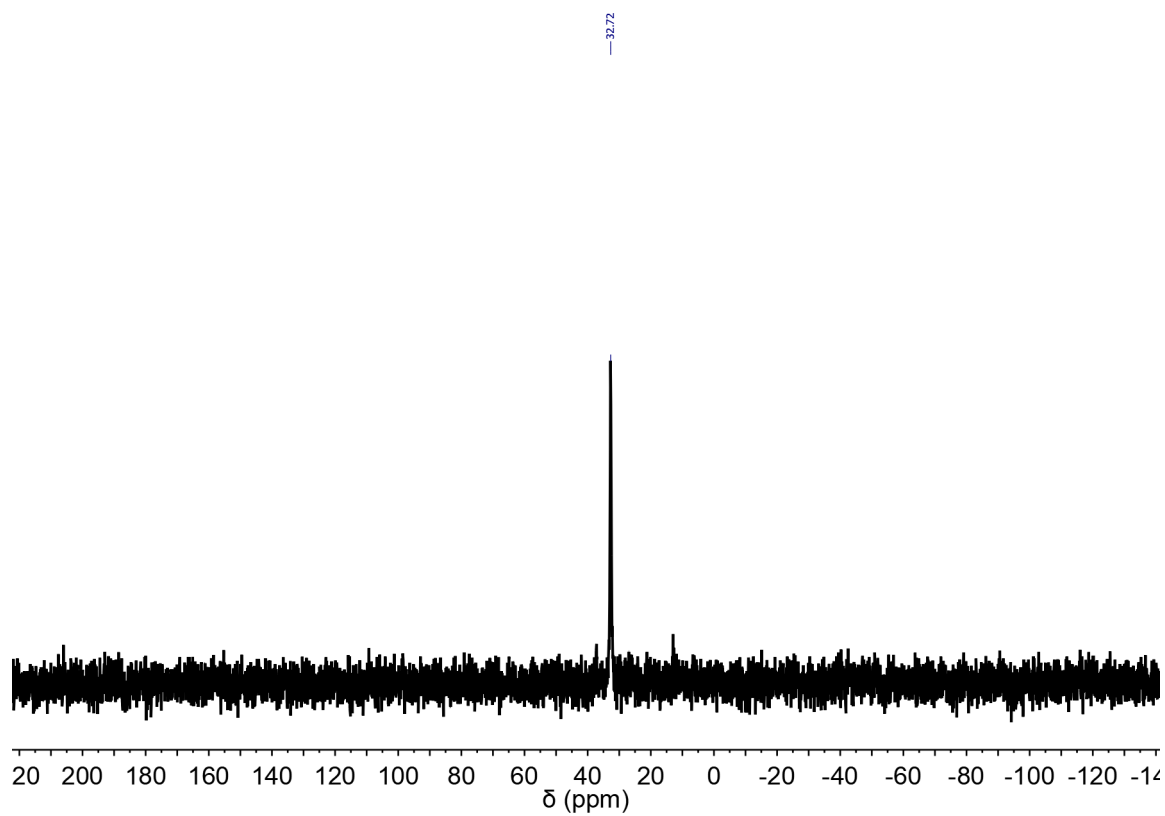

Figure S.88 –  $^{31}\text{P}\{^1\text{H}\}$  NMR (162 MHz,  $\text{CDCl}_3$ , 25°C) spectrum

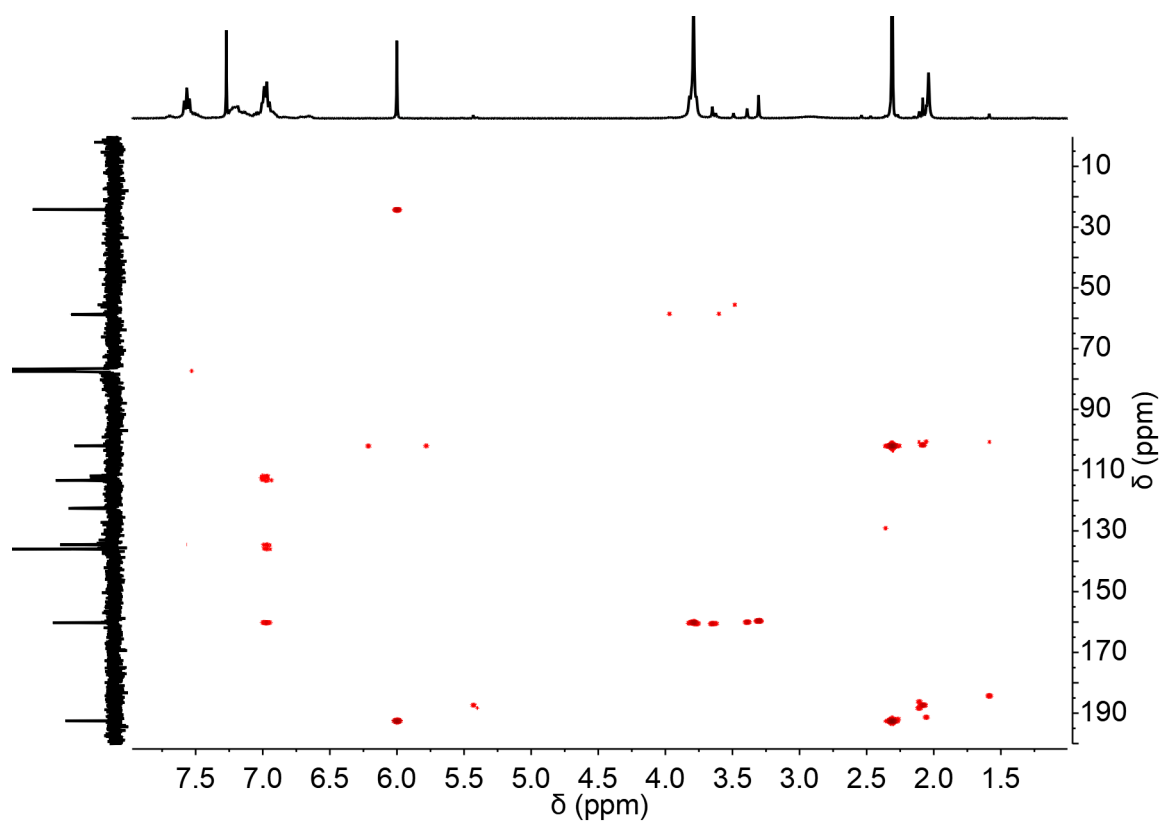

Figure S.89 –  $^1\text{H}$ - $^{13}\text{C}$  HMBC NMR (400 MHz,  $\text{CDCl}_3$ , 25°C) spectrum

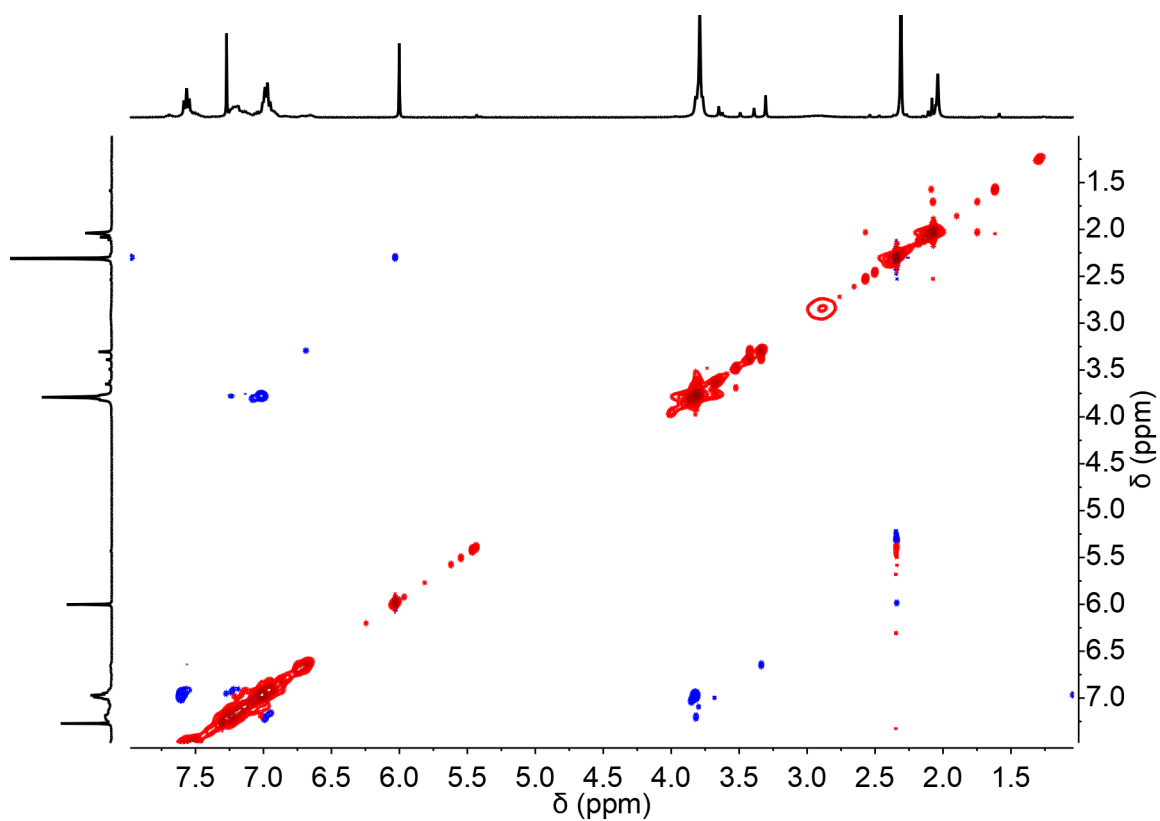

Figure S.90 –  $^1\text{H}$ - $^1\text{H}$  NOESY NMR (400 MHz,  $\text{CDCl}_3$ ,  $25^\circ\text{C}$ ) spectrum of **6**

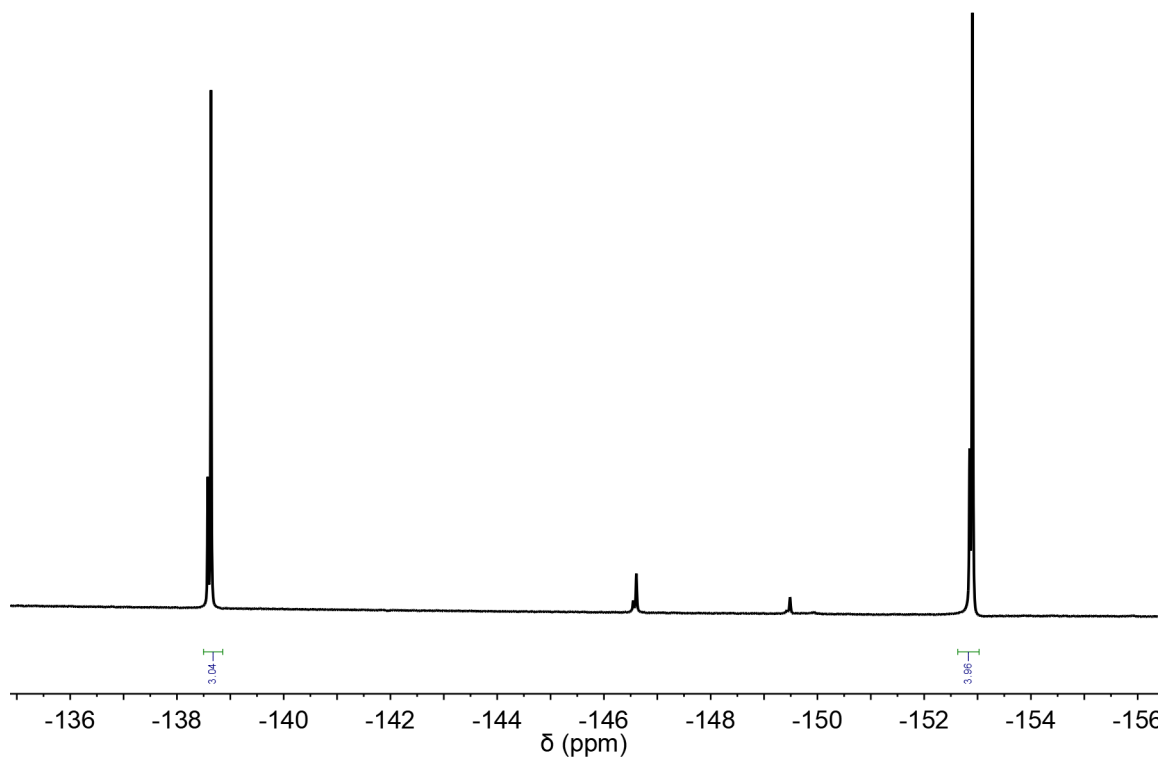

Figure S.91 –  $^{19}\text{F}$  NMR (376 MHz,  $\text{CDCl}_3$ ,  $25^\circ\text{C}$ ) spectrum

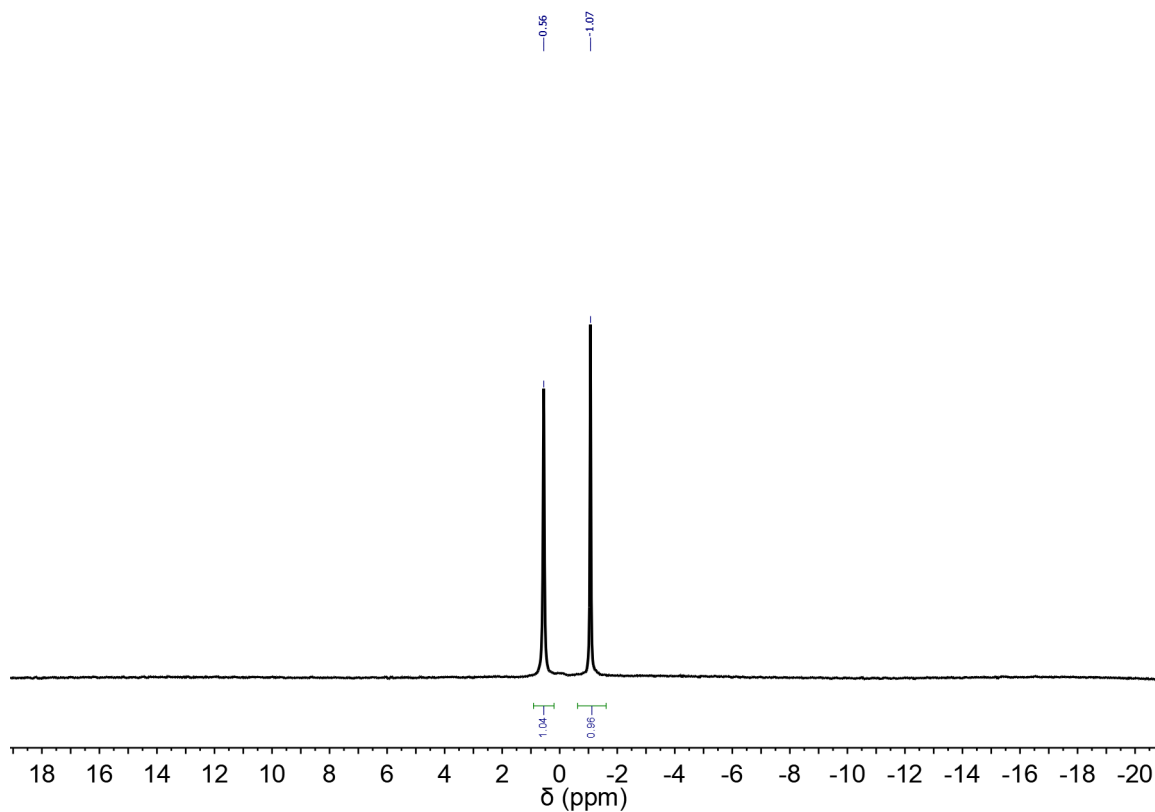

Figure S.92 –  $^{11}\text{B}$  NMR (128 MHz,  $\text{CDCl}_3$ , 25°C) spectrum

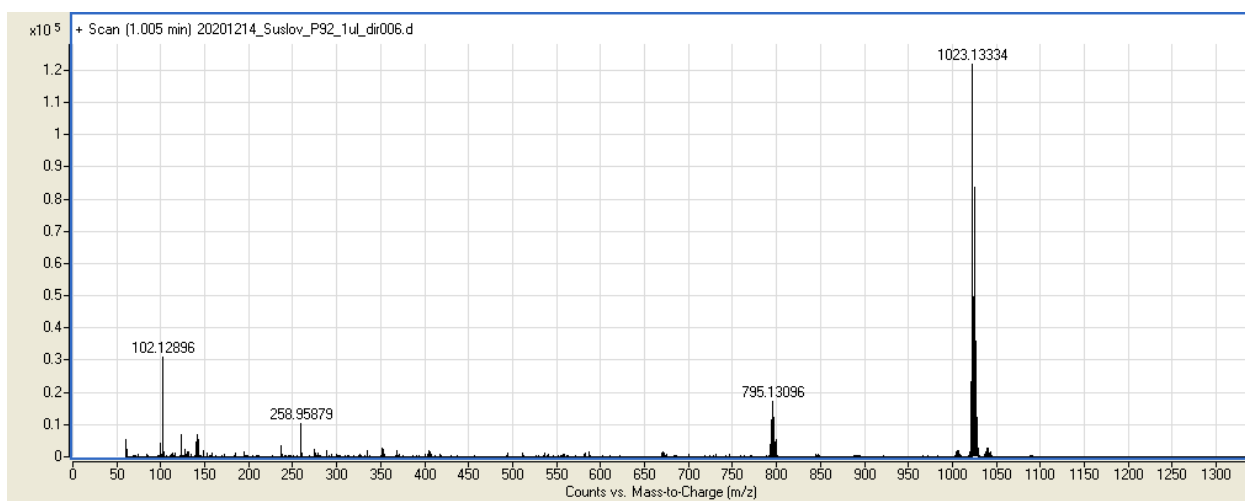

Figure S.93 – ESI-MS spectrum (MeCN, positive ion mode)

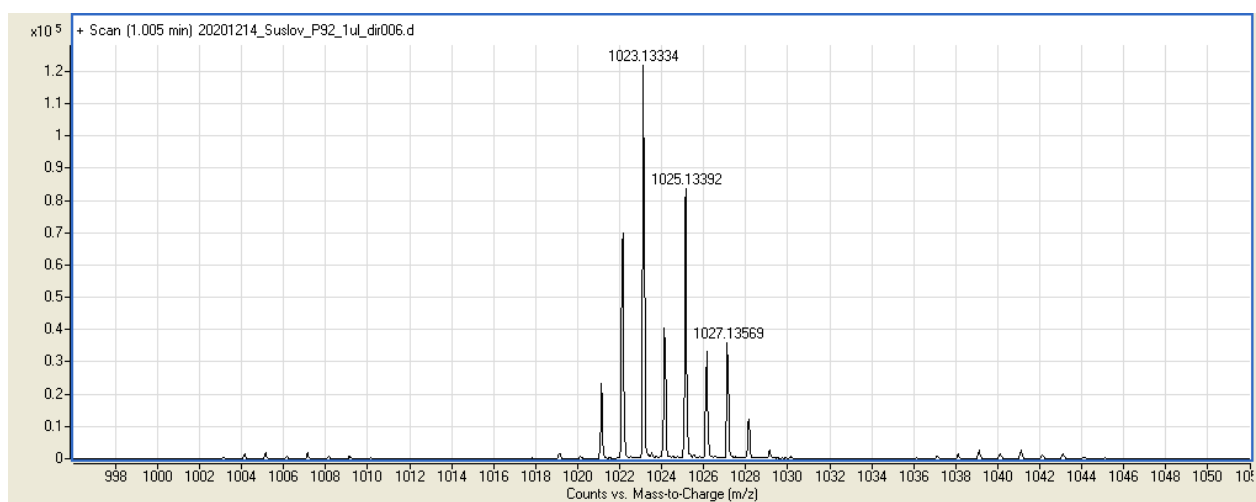

Figure S.94 – ESI-MS spectrum, main Pd cation zoomed (MeCN, positive ion mode)

## S.8 PPAs characterization

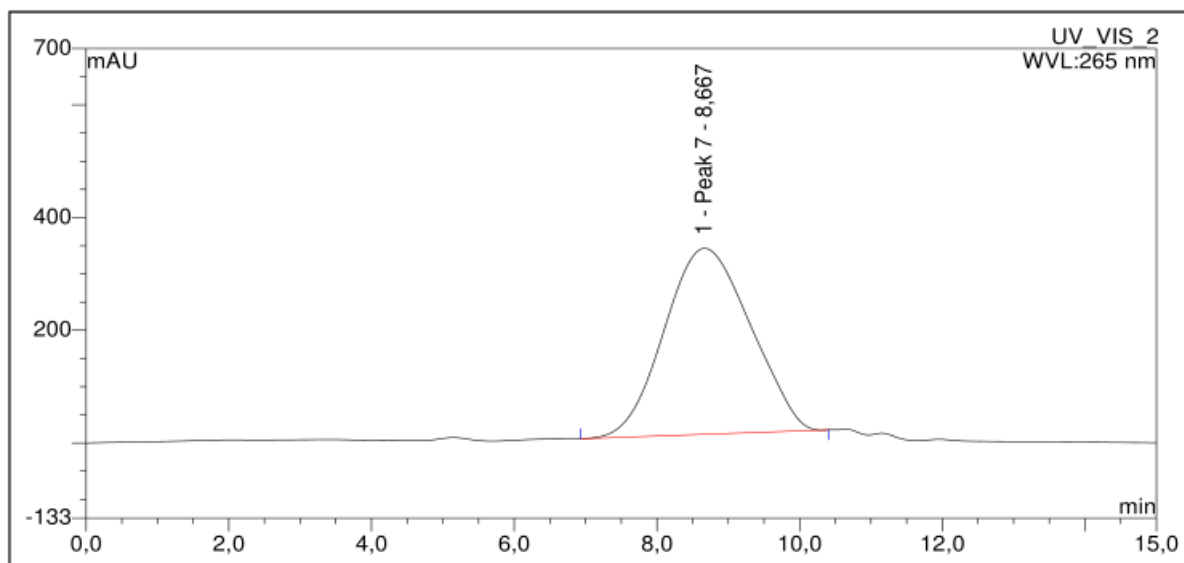

| Peaks                        |        |      |      |
|------------------------------|--------|------|------|
| Peak number                  | 1      | 2    | 3    |
| Peak name                    | Peak 7 | n.a. | n.a. |
| Peak Parameters              |        |      |      |
| Ret. Time Peak Start [min]   | 6.93   | n.a. | n.a. |
| Mw (Peak Start) [Da]         | 347091 | n.a. | n.a. |
| Ret. Time Peak Maximum [min] | 8.67   | n.a. | n.a. |
| Mw (Peak Maximum) [Da]       | 15482  | n.a. | n.a. |
| Ret. Time Peak End [min]     | 10.41  | n.a. | n.a. |
| Mw (Peak End) [Da]           | 682    | n.a. | n.a. |
| Peak Area [rel. units]       | 460.21 | n.a. | n.a. |
| % Total Peak Area            | 100.00 | n.a. | n.a. |
| Averages                     |        |      |      |
| Number Average Mn            | 8919   | n.a. | n.a. |
| Weight Average Mw            | 21380  | n.a. | n.a. |
| Z Average Mz                 | 45110  | n.a. | n.a. |
| (Z+1) Average Mz+1           | 77866  | n.a. | n.a. |
| Polydispersity               |        |      |      |
| Polydispersity PD            | 2.40   | n.a. | n.a. |

Figure S.95 – GPC elution curves recorded from the UV-detector of PPA obtained with **3**,  
Table 5, Entry 11



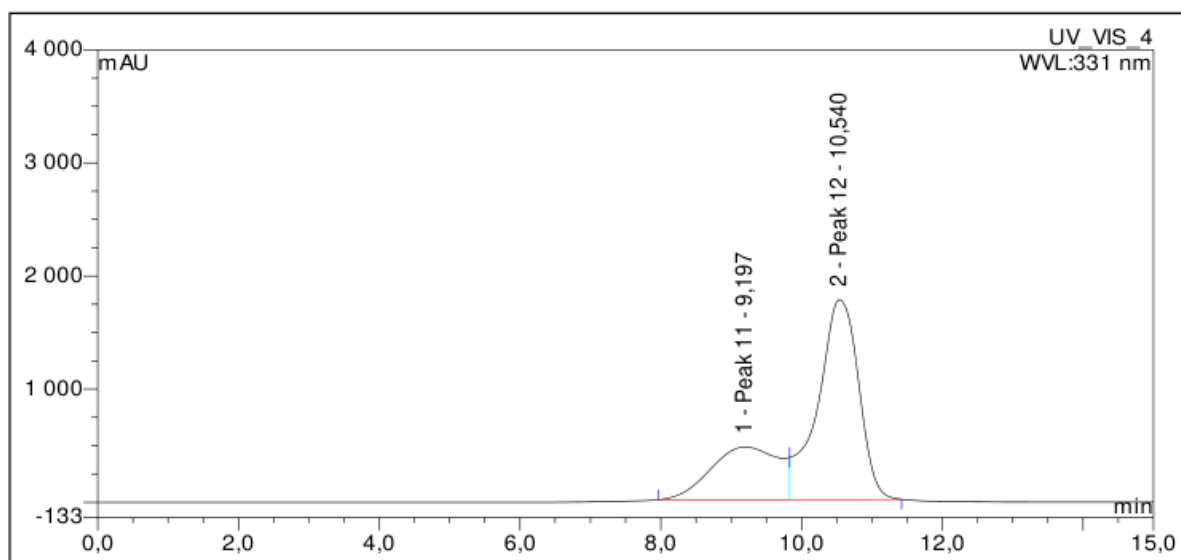

| Peaks                        |         |         |      |
|------------------------------|---------|---------|------|
| Peak number                  | 1       | 2       | 3    |
| Peak name                    | Peak 11 | Peak 12 | n.a. |
| Peak Parameters              |         |         |      |
| Ret. Time Peak Start [min]   | 7,97    | 9,83    | n.a. |
| Mw (Peak Start) [Da]         | 53359   | 1910    | n.a. |
| Ret. Time Peak Maximum [min] | 9,20    | 10,54   | n.a. |
| Mw (Peak Maximum) [Da]       | 5935    | 536     | n.a. |
| Ret. Time Peak End [min]     | 9,83    | 11,42   | n.a. |
| Mw (Peak End) [Da]           | 1910    | 111     | n.a. |
| Peak Area [rel. units]       | 522,97  | 1188,31 | n.a. |
| % Total Peak Area            | 30,56   | 69,44   | n.a. |
| Averages                     |         |         |      |
| Number Average Mn            | 4964    | 513     | n.a. |
| Weight Average Mw            | 7946    | 655     | n.a. |
| Z Average Mz                 | 12921   | 846     | n.a. |
| (Z+1) Average Mz+1           | 18959   | 1064    | n.a. |
| Polydispersity               |         |         |      |
| Polydispersity PD            | 1,60    | 1,28    | n.a. |

Figure S.96 – GPC elution curves recorded from the UV-detector of PPA obtained with **3**,  
Table 5, Entry 13

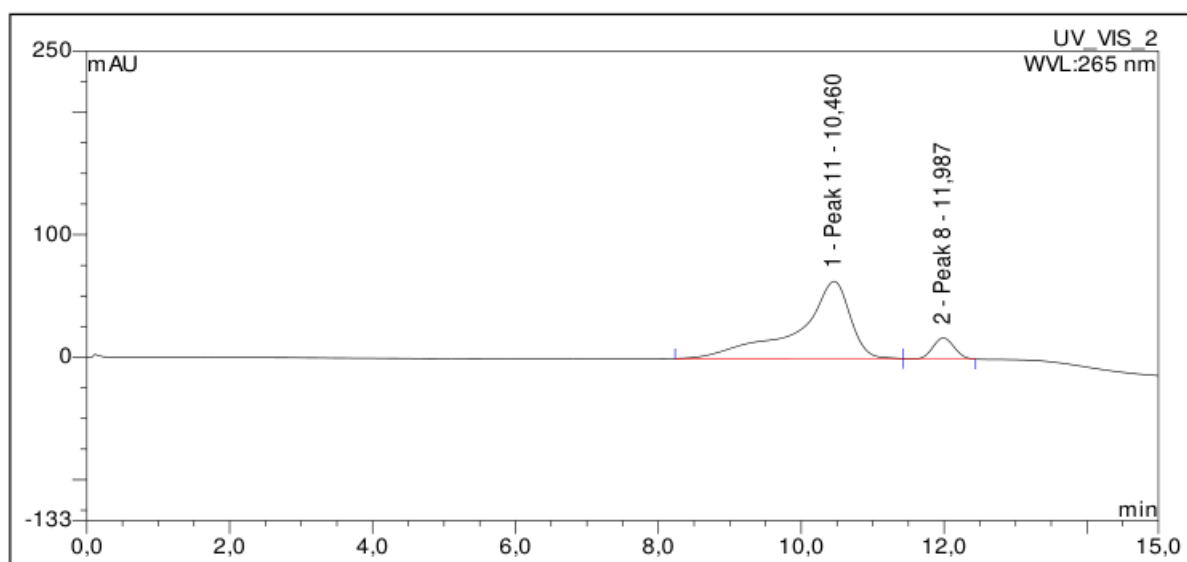

| Peaks                        |         |        |      |
|------------------------------|---------|--------|------|
| Peak number                  | 1       | 2      | 3    |
| Peak name                    | Peak 11 | Peak 8 | n.a. |
| Peak Parameters              |         |        |      |
| Ret. Time Peak Start [min]   | 8,23    | 11,43  | n.a. |
| Mw (Peak Start) [Da]         | 33588   | 111    | n.a. |
| Ret. Time Peak Maximum [min] | 10,46   | 11,99  | n.a. |
| Mw (Peak Maximum) [Da]       | 628     | 41     | n.a. |
| Ret. Time Peak End [min]     | 11,42   | 12,44  | n.a. |
| Mw (Peak End) [Da]           | 112     | 18     | n.a. |
| Peak Area [rel. units]       | 53,50   | 5,88   | n.a. |
| % Total Peak Area            | 90,09   | 9,91   | n.a. |
| Averages                     |         |        |      |
| Number Average Mn            | 801     | 39     | n.a. |
| Weight Average Mw            | 1950    | 41     | n.a. |
| Z Average Mz                 | 5941    | 43     | n.a. |
| (Z+1) Average Mz+1           | 11167   | 45     | n.a. |
| Polydispersity               |         |        |      |
| Polydispersity PD            | 2,44    | 1,06   | n.a. |

Figure S.97 – GPC elution curves recorded from the UV-detector of PPA obtained with **3**, Table 5, Entry 14

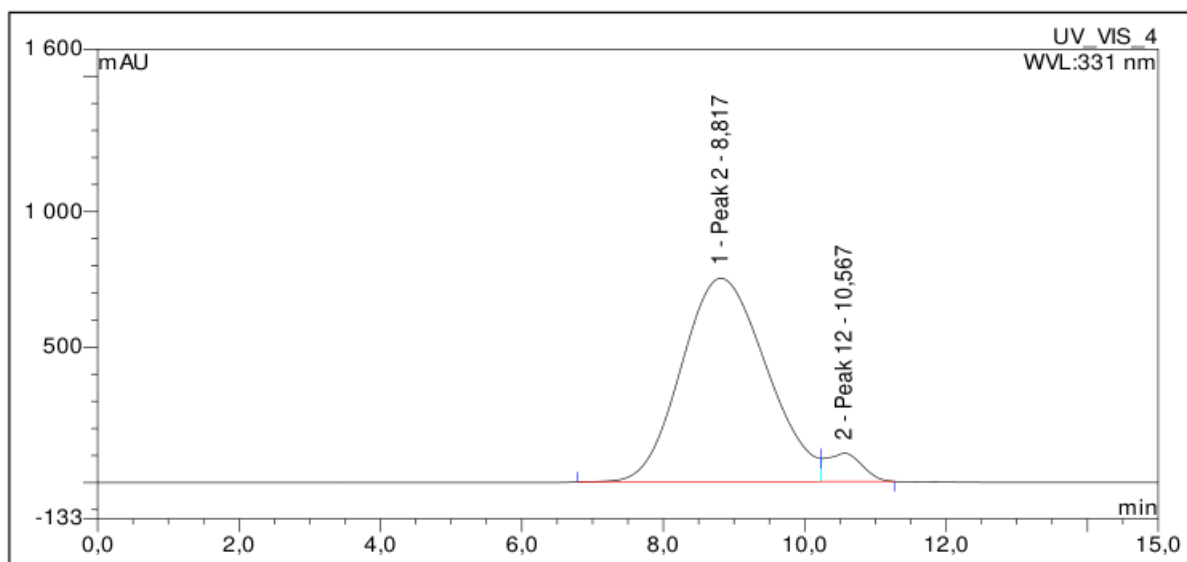

| Peaks                        |         |         |      |
|------------------------------|---------|---------|------|
| Peak number                  | 1       | 2       | 3    |
| Peak name                    | Peak 2  | Peak 12 | n.a. |
| Peak Parameters              |         |         |      |
| Ret. Time Peak Start [min]   | 6,78    | 10,23   | n.a. |
| Mw (Peak Start) [Da]         | 446534  | 928     | n.a. |
| Ret. Time Peak Maximum [min] | 8,82    | 10,57   | n.a. |
| Mw (Peak Maximum) [Da]       | 11719   | 511     | n.a. |
| Ret. Time Peak End [min]     | 10,23   | 11,27   | n.a. |
| Mw (Peak End) [Da]           | 939     | 144     | n.a. |
| Peak Area [rel. units]       | 1049,04 | 60,89   | n.a. |
| % Total Peak Area            | 94,51   | 5,49    | n.a. |
| Averages                     |         |         |      |
| Number Average Mn            | 6509    | 468     | n.a. |
| Weight Average Mw            | 16229   | 537     | n.a. |
| Z Average Mz                 | 37429   | 602     | n.a. |
| (Z+1) Average Mz+1           | 82677   | 658     | n.a. |
| Polydispersity               |         |         |      |
| Polydispersity PD            | 2,49    | 1,15    | n.a. |

Figure S.98 – GPC elution curves recorded from the UV-detector of PPA obtained with **3**,  
Table 5, Entry 19

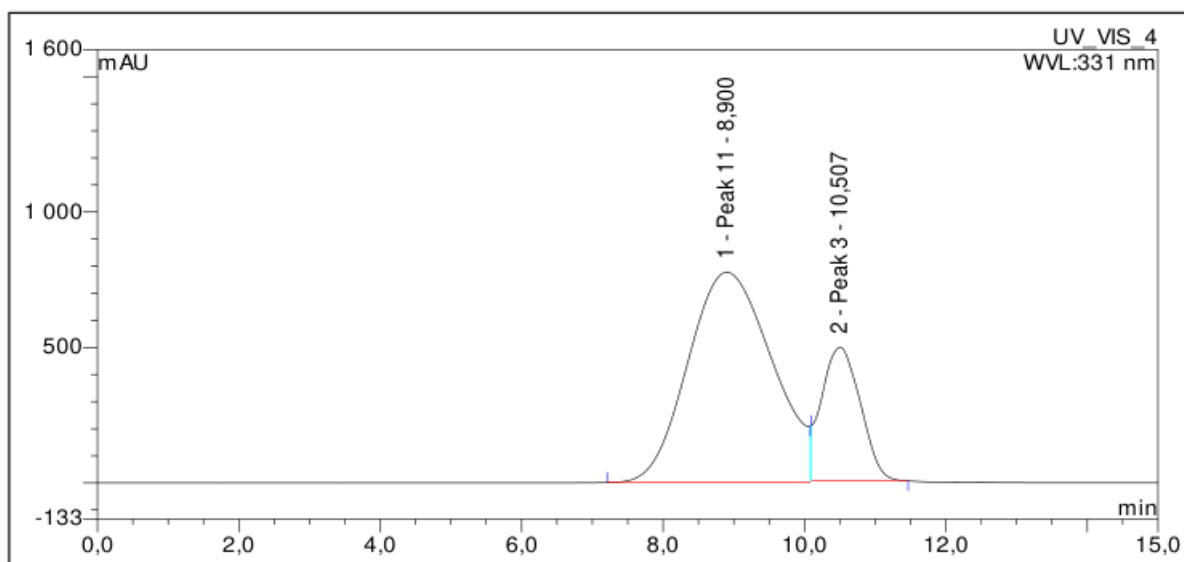

| Peaks                        |         |        |      |
|------------------------------|---------|--------|------|
| Peak number                  | 1       | 2      | 3    |
| Peak name                    | Peak 11 | Peak 3 | n.a. |
| Peak Parameters              |         |        |      |
| Ret. Time Peak Start [min]   | 7,21    | 10,10  | n.a. |
| Mw (Peak Start) [Da]         | 208025  | 1178   | n.a. |
| Ret. Time Peak Maximum [min] | 8,90    | 10,51  | n.a. |
| Mw (Peak Maximum) [Da]       | 10095   | 569    | n.a. |
| Ret. Time Peak End [min]     | 10,08   | 11,47  | n.a. |
| Mw (Peak End) [Da]           | 1214    | 102    | n.a. |
| Peak Area [rel. units]       | 1068,27 | 312,64 | n.a. |
| % Total Peak Area            | 77,36   | 22,64  | n.a. |
| Averages                     |         |        |      |
| Number Average Mn            | 5927    | 492    | n.a. |
| Weight Average Mw            | 13442   | 586    | n.a. |
| Z Average Mz                 | 27479   | 680    | n.a. |
| (Z+1) Average Mz+1           | 46937   | 764    | n.a. |
| Polydispersity               |         |        |      |
| Polydispersity PD            | 2,27    | 1,19   | n.a. |

Figure S.99 – GPC elution curves recorded from the UV-detector of PPA obtained with **3**,  
Table 5, Entry 20

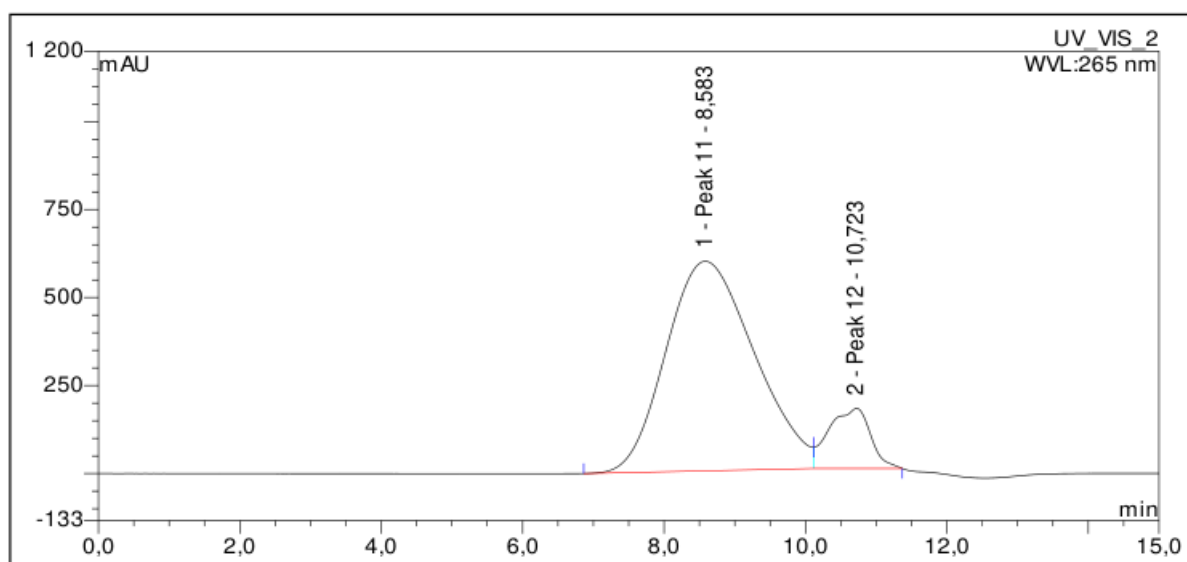

| Peaks                        |         |         |      |
|------------------------------|---------|---------|------|
| Peak number                  | 1       | 2       | 3    |
| Peak name                    | Peak 11 | Peak 12 | n.a. |
| Peak Parameters              |         |         |      |
| Ret. Time Peak Start [min]   | 6,86    | 10,12   | n.a. |
| Mw (Peak Start) [Da]         | 388691  | 1153    | n.a. |
| Ret. Time Peak Maximum [min] | 8,58    | 10,72   | n.a. |
| Mw (Peak Maximum) [Da]       | 17968   | 392     | n.a. |
| Ret. Time Peak End [min]     | 10,12   | 11,37   | n.a. |
| Mw (Peak End) [Da]           | 1153    | 123     | n.a. |
| Peak Area [rel. units]       | 860,51  | 115,87  | n.a. |
| % Total Peak Area            | 88,13   | 11,87   | n.a. |
| Averages                     |         |         |      |
| Number Average Mn            | 8843    | 430     | n.a. |
| Weight Average Mw            | 23138   | 523     | n.a. |
| Z Average Mz                 | 48280   | 623     | n.a. |
| (Z+1) Average Mz+1           | 80559   | 717     | n.a. |
| Polydispersity               |         |         |      |
| Polydispersity PD            | 2,62    | 1,22    | n.a. |

Figure S.100 – GPC elution curves recorded from the UV-detector of PPA obtained with **3**, Table 5, Entry 24

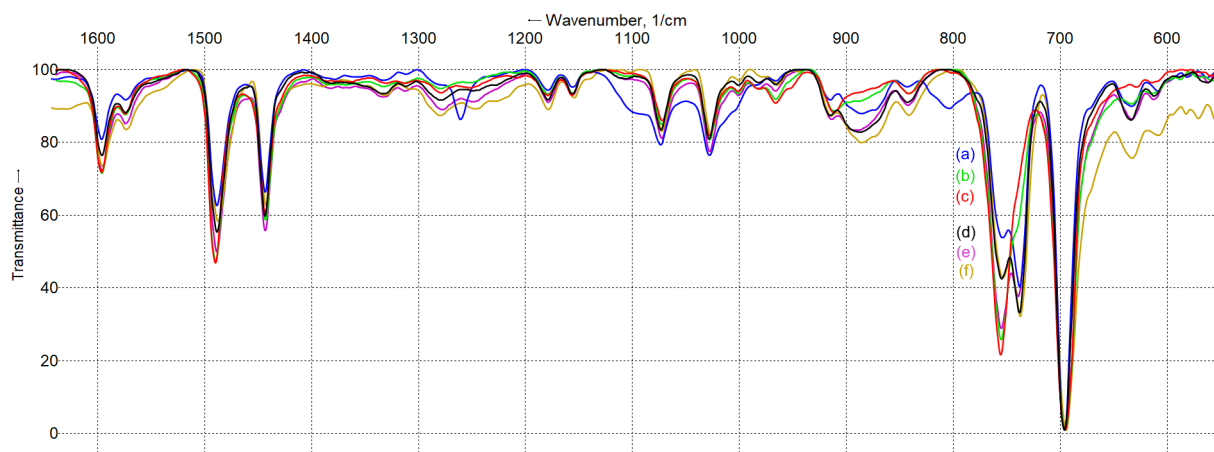

Figure S.101 – FTIR spectra (KBr) of PPAs obtained with **3**, samples reported in Table 5: Entry 11 (a), Entry 13 (b), Entry 14 (c), Entry 19 (d), Entry 20 (e), Entry 24 (f).

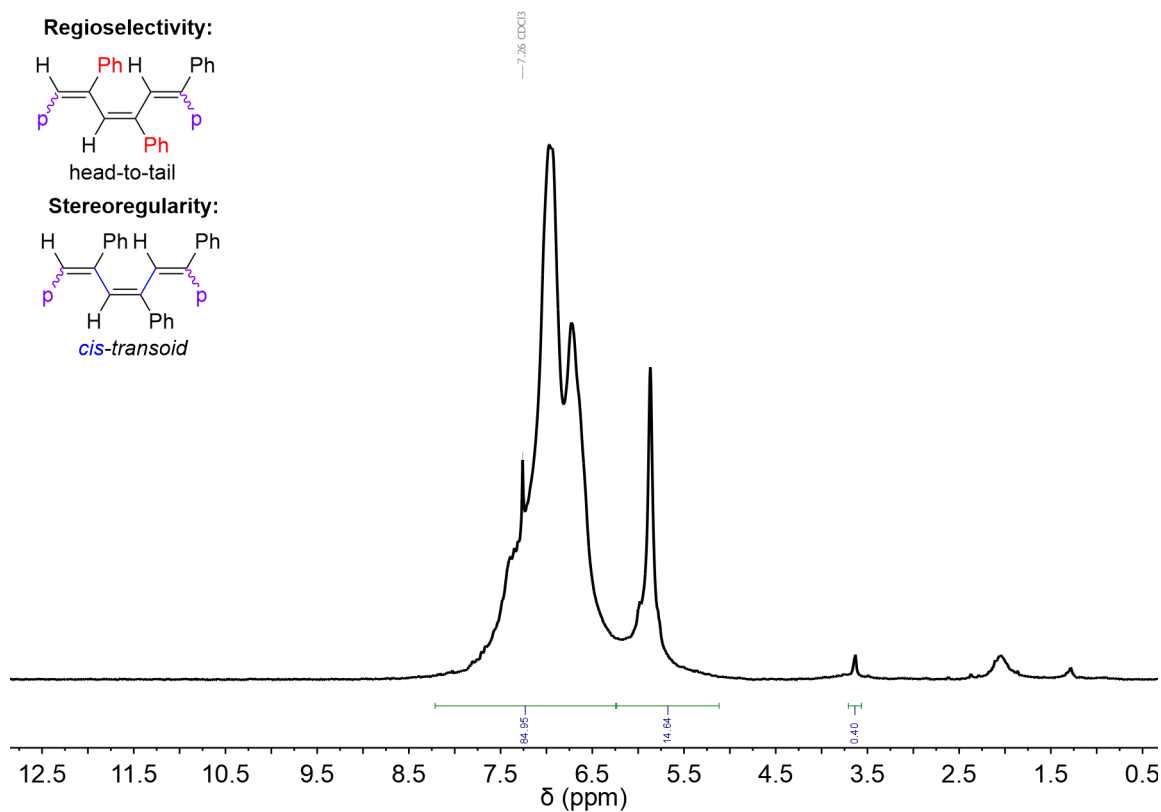

Figure S.102 – <sup>1</sup>H NMR (60 MHz, CDCl<sub>3</sub>, 40°C) spectrum of PPA obtained with **3** at 25°C in THF in CDCl<sub>3</sub> (see Table 5, Entry 24)

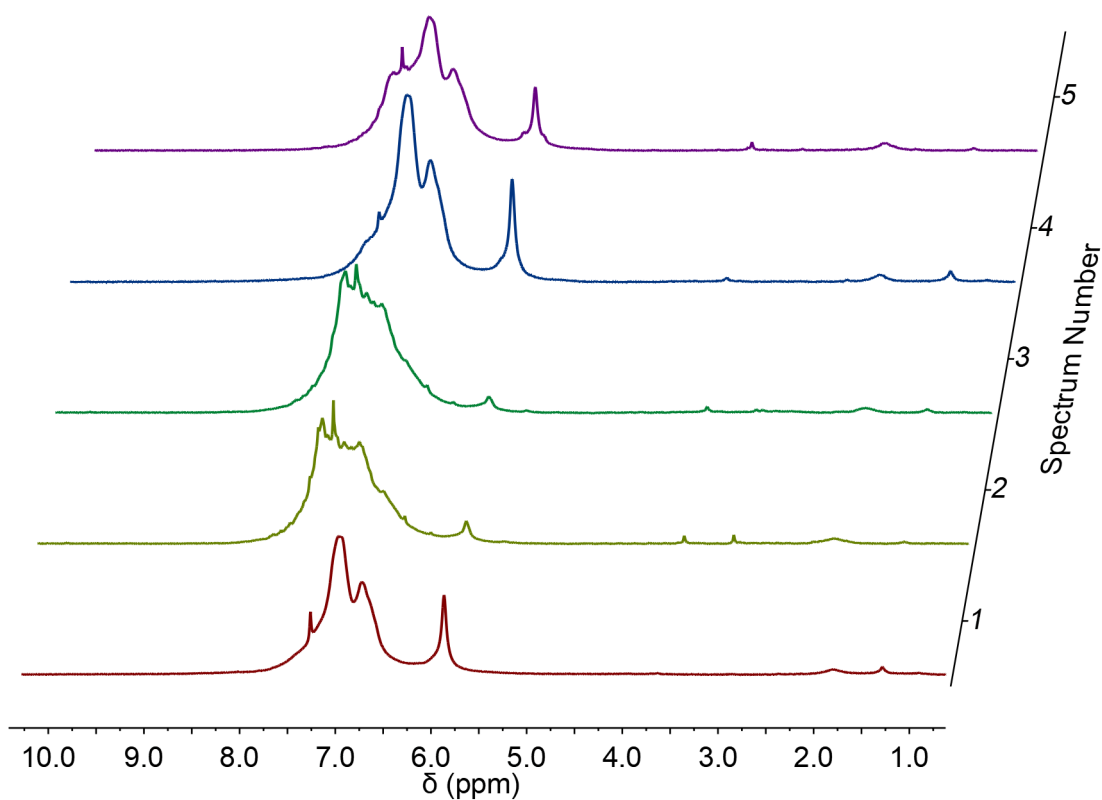

Figure S.103 – <sup>1</sup>H NMR (60 MHz, CDCl<sub>3</sub>, 40°C) spectra of PPAs obtained with **3**, samples reported in Table 5: Entry 11 (1), Entry 13 (2), Entry 14 (3), Entry 19 (4), Entry 20 (5)
